# Supplementary material
Source: publisher figshare collection journal article supplement (https://gsapubs.figshare.com/articles/dataset/_/13150865)
Supplement: Supplementary file 1 [file 1]

## Sheet: PlotDat2
Source sheet	Sheet1	0.97252	0.849355	7.5789	0.065891	3.55492	0.0988622	2.22044	0.155085	1.55827	0.252994	1.16482	0.424439	0.906115	0.734523	0.724027	1.29677	0.650868	1.7342	0.650868	1.71642	0.650868	1.75199	7.56836	0.0657994	0	0.837323	1.09179	0.849355	0.065383	0.840274	1.11143	0.766553	0.605476	0.890815	0.0272584	0.830169	5.58266	0.834669	0.102316	0.83133	5.88353	0.802287	0.705315	0.816049	0.295151	0.914316	0.61959	0.991992
Plot name	Concordia1	0.059214	0.840274	7.57879	0.0659122	3.55487	0.0989061	2.2204	0.155176	1.5582	0.253173	1.16493	0.424845	0.906157	0.735358	0.724055	1.29847	0.673908	1.57159	0.673908	1.55583	0.673908	1.58735	3.54967	0.0987156	100	0.156034	1.09063	0.857907	0.065323	0.847167	1.10907	0.797471	0.604756	0.905655	0.0272256	0.831984	5.57861	0.839466	0.102234	0.833972	5.88023	0.805142	0.704385	0.821343	0.294734	0.929906	0.618288	1.01139
Plot Type	1	0.869107	0.766553	7.57849	0.0659311	3.55471	0.0989464	2.22029	0.15526	1.55809	0.253338	1.165	0.425255	0.906166	0.736178	0.724056	1.30014	0.698109	1.42485	0.698109	1.41088	0.698109	1.43881	2.21696	0.154833			1.08717	0.866293	0.0651441	0.853925	1.10205	0.827788	0.602611	0.920205	0.0271277	0.833764	5.56656	0.84417	0.101989	0.836563	5.8704	0.807941	0.701613	0.826534	0.293489	0.945193	0.614405	1.03041
1st free col	85	0.531521	0.890815	7.57798	0.0659475	3.55446	0.0989822	2.22012	0.155335	1.55793	0.253484	1.16503	0.42566	0.906142	0.736968	0.724029	1.30174	0.723554	1.2924	0.723554	1.28002	0.723554	1.30477	1.5557	0.252419			1.08148	0.874348	0.0648497	0.860418	1.09048	0.856913	0.599082	0.934184	0.0269667	0.835474	5.54673	0.848689	0.101586	0.839053	5.85424	0.81063	0.697053	0.83152	0.291442	0.959879	0.608019	1.04868
Sigma Level	1	0.0238837	0.830169	7.57729	0.065961	3.55412	0.0990127	2.21988	0.155401	1.55772	0.253609	1.16502	0.426053	0.906087	0.737714	0.723975	1.30325	0.750337	1.17281	0.750337	1.16185	0.750337	1.18378	1.16298	0.425008			1.07367	0.881918	0.0644456	0.866518	1.07461	0.884279	0.594238	0.947319	0.0267456	0.837081	5.51951	0.852935	0.101033	0.841392	5.83206	0.813157	0.690794	0.836206	0.288631	0.973678	0.599252	1.06585
Absolute Errs	FALSE	5.16707	0.834669	7.57643	0.0659713	3.55369	0.0990375	2.21959	0.155456	1.55748	0.253712	1.16497	0.426425	0.906	0.738399	0.723895	1.30463	0.778559	1.06482	0.778559	1.05511	0.778559	1.07454	0.904487	0.734635			1.06389	0.888853	0.0639398	0.872108	1.05474	0.909353	0.588174	0.959353	0.0264689	0.838553	5.48543	0.856825	0.10034	0.843535	5.80428	0.815473	0.682958	0.840499	0.285113	0.986321	0.588277	1.08158
Symbol Type	1	0.0938693	0.83133	7.57541	0.0659783	3.55318	0.0990561	2.21925	0.155499	1.5572	0.253789	1.16488	0.426769	0.905883	0.73901	0.723791	1.30586	0.808333	0.967268	0.808333	0.95866	0.808333	0.975877	0.722643	1.2968			1.05233	0.89502	0.0633419	0.877078	1.03125	0.931649	0.581007	0.970054	0.0261419	0.839862	5.44515	0.860284	0.0995215	0.84544	5.77146	0.817531	0.673697	0.844316	0.280955	0.997563	0.575305	1.09557
Inverse Plot	TRUE	5.54481	0.802287	7.57425	0.0659818	3.5526	0.099068	2.21886	0.155529	1.55689	0.25384	1.16475	0.42708	0.90574	0.739537	0.723664	1.30692	0.839783	0.879121	0.839783	0.871493	0.839783	0.886748	IsoLine	IsoLine			1.03921	0.900298	0.0626637	0.881332	1.00461	0.950731	0.572876	0.979213	0.0257708	0.840982	5.39947	0.863245	0.0985929	0.847071	5.73422	0.819293	0.663191	0.847583	0.276238	1.00718	0.560591	1.10754
Color Plot	TRUE	0.609754	0.816049	7.57298	0.0659818	3.55196	0.099073	2.21844	0.155545	1.55656	0.253863	1.16459	0.42735	0.905572	0.739969	0.723518	1.30777	0.873048	0.799448	0.873048	0.792691	0.873048	0.806205					1.0248	0.904584	0.0619184	0.884787	0.975336	0.966228	0.563941	0.98665	0.0253631	0.841892	5.34925	0.865649	0.0975723	0.848396	5.6933	0.820724	0.651645	0.850237	0.271053	1.015	0.544419	1.11726
3D plot	FALSE	0.252244	0.914316	7.57161	0.0659782	3.55128	0.0990711	2.21799	0.155547	1.55621	0.253858	1.1644	0.427574	0.905383	0.740296	0.723354	1.30841	0.90828	0.727414	0.90828	0.721428	0.90828	0.733401					1.00938	0.907795	0.0611204	0.887375	0.94399	0.977838	0.554374	0.992223	0.0249266	0.842574	5.2955	0.867451	0.0964796	0.849388	5.64948	0.821796	0.639284	0.852224	0.265503	1.02085	0.527106	1.12454
Linear	FALSE	0.485746	0.991992	7.57019	0.0659711	3.55057	0.0990623	2.21752	0.155536	1.55586	0.253824	1.16418	0.427748	0.905177	0.740513	0.723177	1.30883	0.945653	0.662267	0.945653	0.656963	0.945653	0.667571					0.993231	0.909869	0.0602853	0.889046	0.911187	0.985336	0.544363	0.995822	0.0244697	0.843014	5.23924	0.868614	0.0953362	0.850029	5.60363	0.822489	0.626348	0.853508	0.259695	1.02463	0.508988	1.12925
Data Range	M720:P747	0.87615	0.814024	7.56872	0.0659607	3.54985	0.0990467	2.21703	0.15551	1.55549	0.253764	1.16394	0.427869	0.904957	0.740616	0.722989	1.30901	0.985357	0.603329	0.985357	0.598631	0.985357	0.608028					0.976682	0.910765	0.0594293	0.889769	0.877564	0.988576	0.534102	0.997377	0.0240015	0.843204	5.18158	0.869117	0.0941641	0.850306	5.55664	0.822788	0.613089	0.854063	0.253742	1.02627	0.490417	1.13128
Filled Symbols	FALSE	0.182815	0.841425	7.56725	0.0659472	3.54911	0.0990247	2.21655	0.155472	1.55514	0.253677	1.16368	0.427935	0.904728	0.740603	0.722795	1.30896	1.02761	0.549991	1.02761	0.545829	1.02761	0.554153					0.960053	0.910466	0.0585692	0.889527	0.843778	0.987494	0.523791	0.996858	0.023531	0.843141	5.12363	0.868949	0.0929864	0.850213	5.50941	0.822688	0.599765	0.853878	0.247759	1.02572	0.471755	1.1306
ConcAge	FALSE	4.47935	0.74368	7.56581	0.0659308	3.54839	0.0989967	2.21607	0.155421	1.55479	0.253566	1.1634	0.427943	0.904494	0.740473	0.722597	1.30867	1.07265	0.501704	1.07265	0.498017	1.07265	0.505391					0.943666	0.908978	0.0577216	0.888328	0.810484	0.982112	0.51363	0.994274	0.0230673	0.842825	5.06654	0.868114	0.0918258	0.849753	5.46287	0.822191	0.586636	0.852956	0.241864	1.02301	0.453366	1.12722
ConcSwap	FALSE	0.231935	0.823146	7.56441	0.0659118	3.5477	0.0989632	2.21561	0.155359	1.55446	0.253432	1.16312	0.427894	0.90426	0.74023	0.722401	1.30815	1.12076	0.457976	1.12076	0.45471	1.12076	0.461241					0.927841	0.906329	0.0569031	0.886193	0.778331	0.972535	0.503817	0.989678	0.0226195	0.842262	5.01139	0.866628	0.090705	0.848935	5.41793	0.821307	0.573956	0.851316	0.236171	1.01818	0.435607	1.12122
1st Symbol-row	1	19.5017	0.780122	7.56309	0.0658906	3.54704	0.0989248	2.21518	0.155286	1.55416	0.253279	1.16284	0.427789	0.904031	0.739878	0.722209	1.3074	1.17224	0.41836	1.17224	0.415467	1.17224	0.421253					0.912886	0.902571	0.0561295	0.883164	0.747945	0.958948	0.494544	0.983156	0.0221964	0.841465	4.95928	0.86452	0.0896458	0.847773	5.37546	0.820052	0.561973	0.84899	0.230791	1.01133	0.418823	1.11269
		1.51488	0.783199	7.56187	0.0658677	3.54643	0.0988824	2.21478	0.155205	1.55389	0.253109	1.16255	0.42763	0.90381	0.739424	0.722025	1.30645	1.22746	0.382458	1.22746	0.379896	1.22746	0.38502					0.899091	0.897777	0.055416	0.8793	0.719917	0.941616	0.48599	0.974838	0.0218061	0.840447	4.91122	0.861831	0.0886688	0.846292	5.33628	0.818452	0.550921	0.846023	0.225828	1.00259	0.403343	1.10182
		30.0779	0.55386	7.56077	0.0658434	3.54589	0.0988368	2.21442	0.155116	1.55365	0.252926	1.16228	0.42742	0.903603	0.738876	0.721854	1.30532	1.28682	0.349909	1.28682	0.347639	1.28682	0.352178					0.886725	0.89204	0.0547764	0.874677	0.694793	0.920877	0.478322	0.964884	0.0214562	0.839229	4.86813	0.858613	0.0877931	0.84452	5.30117	0.816537	0.541013	0.842472	0.22138	0.992132	0.389466	1.08881
		0.477796	0.960904	7.55983	0.0658183	3.54542	0.0987888	2.21412	0.155022	1.55345	0.252732	1.16202	0.427163	0.903413	0.738246	0.721698	1.30401	1.3508	0.320388	1.3508	0.318378	1.3508	0.322397					0.87603	0.885473	0.0542232	0.869384	0.673062	0.897134	0.47169	0.953489	0.0211535	0.837835	4.83086	0.854929	0.0870356	0.84249	5.27079	0.814344	0.532443	0.838407	0.217532	0.98016	0.377463	1.07391
		0.684023	0.868165	7.55905	0.0657928	3.54503	0.0987394	2.21387	0.154924	1.5533	0.252533	1.16178	0.426864	0.903244	0.737546	0.72156	1.30257	1.41993	0.293602	1.41993	0.291822	1.41993	0.295382					0.867212	0.878203	0.0537671	0.863525	0.655147	0.87085	0.466223	0.940873	0.020904	0.836292	4.80014	0.850851	0.0864111	0.840244	5.24575	0.811917	0.525378	0.833906	0.21436	0.966906	0.367568	1.05742
		0.672399	0.950153	7.55845	0.0657674	3.54474	0.0986895	2.21368	0.154825	1.55319	0.252331	1.16156	0.426529	0.903098	0.736789	0.721444	1.30101	1.49484	0.269288	1.49484	0.267712	1.49484	0.270864					0.860444	0.870372	0.0534171	0.857213	0.641396	0.842535	0.462026	0.927284	0.0207125	0.83463	4.77655	0.846458	0.0859317	0.837824	5.22653	0.809303	0.519956	0.829059	0.211925	0.952629	0.359973	1.03966
		0.191041	0.882767	7.55805	0.0657426	3.54453	0.0986401	2.21355	0.154725	1.55313	0.252131	1.16137	0.426164	0.90298	0.73599	0.721351	1.29938	1.57629	0.247209	1.57629	0.245813	1.57629	0.248605					0.855858	0.862131	0.0531799	0.850571	0.632078	0.812742	0.459182	0.912984	0.0205828	0.832881	4.76057	0.841836	0.0856069	0.835277	5.21351	0.806552	0.516281	0.823958	0.210275	0.937607	0.354826	1.02097
		0.715209	0.945435	7.55784	0.065719	3.54443	0.0985922	2.21349	0.154628	1.55312	0.251937	1.16121	0.425777	0.902892	0.735165	0.721282	1.29769	1.66513	0.22715	1.66513	0.225913	1.66513	0.228386					0.853542	0.853642	0.0530601	0.843729	0.627373	0.78205	0.457746	0.898253	0.0205172	0.831079	4.7525	0.837074	0.0854429	0.832654	5.20693	0.803718	0.514426	0.818703	0.209442	0.92213	0.352227	1.00171
		0.107232	0.857432	7.55784	0.0656969	3.54444	0.0985467	2.21349	0.154535	1.55316	0.251752	1.16109	0.425375	0.902834	0.73433	0.721241	1.29598	1.7624	0.208917	1.7624	0.207823	1.7624	0.210012					0.853542	0.845069	0.0530601	0.83682	0.627373	0.751056	0.457746	0.883377	0.0205172	0.829259	4.7525	0.832265	0.0854429	0.830005	5.20693	0.800856	0.514426	0.813396	0.209442	0.906502	0.352227	0.98227
		1.65954	0.838743	7.55805	0.0656768	3.54454	0.0985045	2.21357	0.154447	1.55325	0.25158	1.161	0.424966	0.902809	0.7335	0.721226	1.2943	1.86935	0.192338	1.86935	0.191369	1.86935	0.193308					0.855858	0.83658	0.0531799	0.829977	0.632078	0.720363	0.459182	0.868646	0.0205828	0.827457	4.76057	0.827503	0.0856069	0.827382	5.21351	0.798022	0.516281	0.808141	0.210275	0.891026	0.354826	0.963015
		66.6609	0.882856	7.55845	0.0656591	3.54474	0.0984664	2.21371	0.154367	1.55339	0.251424	1.16095	0.424557	0.902816	0.732693	0.72124	1.29266	1.98745	0.177255	1.98745	0.176397	1.98745	0.178113					0.860444	0.828339	0.0534171	0.823336	0.641396	0.69057	0.462026	0.854347	0.0207125	0.825708	4.77655	0.82288	0.0859317	0.824836	5.22653	0.795271	0.519956	0.80304	0.211925	0.876003	0.359973	0.944324
		1.53516	0.84335	7.55905	0.0656442	3.54504	0.0984331	2.21391	0.154296	1.55357	0.251288	1.16094	0.424157	0.902856	0.731923	0.72128	1.2911	2.11852	0.163526	2.11852	0.162766	2.11852	0.164286					0.867212	0.820508	0.0537671	0.817024	0.655147	0.662255	0.466223	0.840757	0.020904	0.824045	4.80014	0.818487	0.0864111	0.822416	5.24575	0.792656	0.525378	0.798192	0.21436	0.861726	0.367568	0.92656
		0.24209	0.813201	7.55983	0.0656322	3.54543	0.0984053	2.21418	0.154236	1.5538	0.251174	1.16097	0.423774	0.902927	0.731206	0.721347	1.28965	2.26479	0.151023	2.26479	0.15035	2.26479	0.151696					0.87603	0.813238	0.0542232	0.811164	0.673062	0.635971	0.47169	0.828142	0.0211535	0.822502	4.83086	0.814409	0.0870356	0.820169	5.27079	0.790229	0.532443	0.793692	0.217532	0.848473	0.377463	0.910071
		IsoLine	IsoLine	7.56078	0.0656235	3.5459	0.0983836	2.21449	0.154187	1.55406	0.251084	1.16104	0.423415	0.903029	0.730556	0.72144	1.28834	2.42902	0.139631	2.42902	0.139035	2.42902	0.140227					0.886725	0.80667	0.0547764	0.805871	0.694793	0.612228	0.478322	0.816746	0.0214562	0.821108	4.86813	0.810725	0.0877931	0.81814	5.30117	0.788037	0.541013	0.789627	0.22138	0.836501	0.389466	0.895175
				7.56187	0.0656182	3.54645	0.0983684	2.21486	0.154151	1.55436	0.251019	1.16115	0.423087	0.903159	0.729986	0.721555	1.2872	2.6147	0.129245	2.6147	0.128718	2.6147	0.129773					0.899091	0.800934	0.055416	0.801248	0.719917	0.591489	0.48599	0.806793	0.0218061	0.81989	4.91122	0.807507	0.0886688	0.816367	5.33628	0.786122	0.550921	0.786076	0.225828	0.826044	0.403343	0.882165
				7.56309	0.0656165	3.54705	0.0983599	2.21526	0.154128	1.55468	0.250983	1.16129	0.422796	0.903315	0.729505	0.721692	1.28624	2.82628	0.119772	2.82628	0.119305	2.82628	0.120239					0.912886	0.79614	0.0561295	0.797385	0.747945	0.574158	0.494544	0.798474	0.0221964	0.818873	4.95928	0.804818	0.0896458	0.814886	5.37546	0.784521	0.561973	0.783108	0.230791	0.817305	0.418823	0.871292
				7.56441	0.0656183	3.54771	0.0983583	2.2157	0.154118	1.55502	0.250974	1.16147	0.422548	0.903494	0.729125	0.721847	1.28549	3.06951	0.111126	3.06951	0.110713	3.06951	0.11154					0.927841	0.792382	0.0569031	0.794356	0.778331	0.560571	0.503817	0.791953	0.0226195	0.818075	5.01139	0.80271	0.090705	0.813725	5.41793	0.783267	0.573956	0.780782	0.236171	0.810454	0.435607	0.862768
				7.56581	0.0656236	3.54841	0.0983637	2.21617	0.154123	1.55537	0.250993	1.16167	0.422349	0.903692	0.728852	0.722018	1.28495	3.35201	0.103231	3.35201	0.102865	3.35201	0.103597					0.943666	0.789733	0.0577216	0.792221	0.810484	0.550993	0.51363	0.787356	0.0230673	0.817513	5.06654	0.801224	0.0918258	0.812906	5.46287	0.782382	0.586636	0.779142	0.241864	0.805624	0.453366	0.856759
				7.56726	0.0656324	3.54913	0.0983759	2.21664	0.154141	1.55573	0.25104	1.1619	0.4222	0.903906	0.728692	0.722201	1.28465	3.68405	0.0960172	3.68405	0.0956933	3.68405	0.096341					0.960053	0.788245	0.0585692	0.791021	0.843778	0.545611	0.523791	0.784773	0.023531	0.817197	5.12363	0.800389	0.0929864	0.812446	5.50941	0.781886	0.599765	0.778221	0.247759	0.802911	0.471755	0.853383
				7.56873	0.0656444	3.54986	0.0983948	2.21713	0.154173	1.55609	0.251114	1.16215	0.422107	0.904131	0.728647	0.722393	1.28459	4.07982	0.0894214	4.07982	0.0891348	4.07982	0.0897081					0.976682	0.787945	0.0594293	0.79078	0.877564	0.544529	0.534102	0.784254	0.0240015	0.817133	5.18158	0.800221	0.0941641	0.812354	5.55664	0.781786	0.613089	0.778035	0.253742	0.802365	0.490417	0.852704
				7.57019	0.0656594	3.55059	0.0984198	2.21761	0.154218	1.55644	0.251213	1.16242	0.42207	0.904363	0.728718	0.722589	1.28476	4.55949	0.0833873	4.55949	0.0831336	4.55949	0.083641					0.993231	0.788842	0.0602853	0.791502	0.911187	0.547769	0.544363	0.785809	0.0244697	0.817323	5.23924	0.800724	0.0953362	0.812631	5.60363	0.782085	0.626348	0.77859	0.259695	0.803999	0.508988	0.854737
				7.57161	0.0656772	3.5513	0.0984507	2.21808	0.154275	1.55678	0.251336	1.1627	0.42209	0.904597	0.728905	0.722787	1.28517	5.15275	0.0778634	5.15275	0.0776389	5.15275	0.078088					1.00938	0.790915	0.0611204	0.793173	0.94399	0.555267	0.554374	0.789408	0.0249266	0.817764	5.2955	0.801887	0.0964796	0.813271	5.64948	0.782777	0.639284	0.779874	0.265503	0.80778	0.527106	0.859441
				7.57298	0.0656973	3.55198	0.0984867	2.21853	0.154342	1.55709	0.251479	1.16299	0.422167	0.904829	0.729204	0.722981	1.28581	5.90521	0.0728034	5.90521	0.0726046	5.90521	0.0730021					1.0248	0.794127	0.0619184	0.795762	0.975336	0.566878	0.563941	0.79498	0.0253631	0.818445	5.34925	0.803689	0.0975723	0.814264	5.6933	0.783849	0.651645	0.781862	0.271053	0.813634	0.544419	0.866725
				7.57425	0.0657194	3.55261	0.0985271	2.21894	0.154419	1.55738	0.251641	1.16327	0.4223	0.905055	0.729608	0.723169	1.28665	6.8906	0.0681651	6.8906	0.0679892	6.8906	0.068341					1.03921	0.798413	0.0626637	0.799216	1.00461	0.582375	0.572876	0.802418	0.0257708	0.819355	5.39947	0.806093	0.0985929	0.815588	5.73422	0.78528	0.663191	0.784515	0.276238	0.821448	0.560591	0.876447
				7.57541	0.0657431	3.55319	0.0985713	2.21932	0.154505	1.55764	0.251819	1.16355	0.422485	0.905269	0.73011	0.723347	1.2877	8.23657	0.0639106	8.23657	0.0637549	8.23657	0.0640663					1.05233	0.803691	0.0633419	0.80347	1.03125	0.601456	0.581007	0.811576	0.0261419	0.820476	5.44515	0.809054	0.0995215	0.817219	5.77146	0.787042	0.673697	0.787782	0.280955	0.83107	0.575305	0.888418
				7.57643	0.0657678	3.5537	0.0986182	2.21965	0.154596	1.55786	0.252007	1.16382	0.422719	0.905469	0.7307	0.723511	1.28892	10.1848	0.0600053	10.1848	0.0598676	10.1848	0.0601431					1.06389	0.809858	0.0639398	0.80844	1.05474	0.623752	0.588174	0.822277	0.0264689	0.821785	5.48543	0.812513	0.10034	0.819125	5.80428	0.789101	0.682958	0.7916	0.285113	0.842312	0.588277	0.902405
				7.57729	0.0657932	3.55413	0.098667	2.21993	0.154692	1.55804	0.252204	1.16407	0.422997	0.905649	0.731367	0.723659	1.2903	13.2551	0.0564181	13.2551	0.0562962	13.2551	0.05654					1.07367	0.816793	0.0644456	0.81403	1.07461	0.648826	0.594238	0.834312	0.0267456	0.823257	5.51951	0.816404	0.101033	0.821268	5.83206	0.791416	0.690794	0.795893	0.288631	0.854955	0.599252	0.918136
				7.57798	0.0658187	3.55447	0.0987168	2.22016	0.154791	1.55817	0.252405	1.1643	0.423315	0.905806	0.732097	0.723786	1.2918	18.8075	0.0531207	18.8075	0.0530128	18.8075	0.0532286					1.08148	0.824363	0.0648497	0.820131	1.09048	0.676193	0.599082	0.847446	0.0269667	0.824863	5.54673	0.820649	0.101586	0.823607	5.85424	0.793943	0.697053	0.800578	0.291442	0.868754	0.608019	0.935304
				7.57849	0.0658438	3.55472	0.0987666	2.22031	0.154891	1.55825	0.252607	1.1645	0.423666	0.905938	0.732877	0.723891	1.2934	31.8885	0.0500874	31.8885	0.0499919	31.8885	0.0501828					1.08717	0.832418	0.0651441	0.826623	1.10205	0.705317	0.602611	0.861425	0.0271277	0.826573	5.56656	0.825168	0.101989	0.826096	5.8704	0.796632	0.701613	0.805565	0.293489	0.88344	0.614405	0.953576
				7.57879	0.0658681	3.55487	0.0988153	2.22041	0.15499	1.55829	0.252804	1.16468	0.424043	0.906042	0.733691	0.723972	1.29507	100	0.0472949	100	0.0472105	100	0.0473794					1.09063	0.840804	0.065323	0.833382	1.10907	0.735634	0.604756	0.875976	0.0272256	0.828353	5.57861	0.829872	0.102234	0.828687	5.88023	0.799432	0.704385	0.810755	0.294734	0.898726	0.618288	0.972595
				7.5789	0.065891	3.55492	0.0988622	2.22044	0.155085	1.55827	0.252994	1.16482	0.424439	0.906115	0.734523	0.724027	1.29677	IsoLine	IsoLine	ConcBand	ConcBand	ConcBand	ConcBand					1.09179	0.849355	0.065383	0.840274	1.11143	0.766553	0.605476	0.890815	0.0272584	0.830169	5.58266	0.834669	0.102316	0.83133	5.88353	0.802287	0.705315	0.816049	0.295151	0.914316	0.61959	0.991992
				ConcTikEll	ConcTikEll	ConcTikEll	ConcTikEll	ConcTikEll	ConcTikEll	ConcTikEll	ConcTikEll	ConcTikEll	ConcTikEll	ConcTikEll	ConcTikEll	ConcTikEll	ConcTikEll
[truncated: 36 more columns]

## Sheet: Sheet1
Table DR2, Summary of LA-ICP-MS U-Pb Results (bold ablations used in main text)
	comments	204Pb	206Pb	207Pb	208Pb	232Th	238U	Th/U	Pbppm	Thppm	Uppm	238U/206Pb	1s %	207Pb/206Pb	1s %	207Pb/235U	1s %	206Pb/238U	1s %	Rho	207Pb/206Pb	2s abs	206Pb/238U	2s abs	207Pb/235U	2s abs
NIST614_01		5365.81	99224.1	86856.3	211203	77614.7	147522	0.526123	1.17279	0.325696	0.61905	1.43844	1.12172	0.867196	0.450965	83.0866	1.20898	0.695196	1.12172	0.927826	5036.32	12.7809	3402.41	59.0377	4500.02	23.9742
NIST614_02		3501.14	63384.8	56785.8	135782	61289	94486.3	0.648655	0.755576	0.257189	0.396495	1.43895	1.18972	0.872886	0.530552	83.6021	1.30266	0.694951	1.18972	0.913301	5045.58	15.0304	3401.47	62.5863	4506.23	25.8104
NIST614_03		6748.63	121743	107581	257414	84120.4	178488	0.471295	1.43685	0.352996	0.748993	1.40656	1.13354	0.870241	0.440464	85.2684	1.21611	0.710956	1.13354	0.932104	5041.28	12.4806	3462.06	60.4436	4526.03	24.1212
NIST614_04		3452.36	58505.6	55030	130490	46556.6	85358.3	0.545425	0.720366	0.195366	0.358191	1.36661	1.4533	0.869059	0.911581	87.6419	1.71554	0.73174	1.4533	0.847141	5039.36	25.8319	3539.9	78.6909	4553.59	33.8741
NIST614_05		6634.75	119047	106250	253325	85812.4	176814	0.485325	1.4129	0.360097	0.74197	1.41635	1.1373	0.873497	0.462542	84.9953	1.22776	0.706038	1.1373	0.92632	5046.57	13.1032	3443.5	60.3985	4522.81	24.3487
NIST614_06		6827.88	122666	107987	260524	87827	181488	0.483926	1.44996	0.36855	0.761584	1.42712	1.21451	0.867218	0.462123	83.748	1.29946	0.700713	1.21451	0.934628	5036.35	13.0971	3423.35	64.1942	4507.98	25.7484
NIST614_07		4897.74	88950.4	77907.6	188616	59584.8	125174	0.476015	1.04937	0.250037	0.525271	1.36149	1.18875	0.87373	0.539363	88.4441	1.30538	0.73449	1.18875	0.910648	5046.95	15.2792	3550.13	64.5764	4562.74	25.8803
NIST614_08		6953.97	125974	110186	265125	81756.6	183248	0.446153	1.4798	0.343077	0.768967	1.40379	1.17187	0.868348	0.463682	85.2504	1.26027	0.712355	1.17187	0.929856	5038.2	13.1402	3467.33	62.5492	4525.82	24.9864
NIST614_09		6862.44	127540	111699	271030	83233	185275	0.44924	1.50632	0.349272	0.777474	1.40564	1.1456	0.868222	0.473188	85.126	1.23947	0.711419	1.1456	0.924259	5037.99	13.4097	3463.81	61.1067	4524.36	24.5787
NIST614_01		8265.41	151352	132533	322161	89252.1	226202	0.394569	1.80355	0.367886	0.932375	1.44825	0.990723	0.870058	0.19702	82.7964	1.01012	0.690491	0.990723	0.980794	5040.98	5.58264	3384.49	51.963	4496.51	20.0688
NIST614_02		8214.64	150824	132042	319247	88124.1	221075	0.398615	1.79185	0.363236	0.911244	1.41713	0.954957	0.870358	0.222701	84.6434	0.980581	0.705649	0.954957	0.973869	5041.47	6.31019	3442.04	50.7366	4518.65	19.4925
NIST614_03		7755.14	140722	123536	301016	80830.6	203851	0.396518	1.68222	0.333173	0.840247	1.39932	0.93799	0.871387	0.187369	85.8225	0.956521	0.714635	0.93799	0.980627	5043.15	5.3087	3475.91	50.2072	4532.53	19.0217
NIST614_04		5766.01	103802	89848.4	219325	55342.6	149067	0.37126	1.22899	0.228115	0.614435	1.39017	1.05012	0.866934	0.463361	85.9459	1.14781	0.719338	1.05012	0.914895	5035.89	13.1324	3493.57	56.3975	4533.98	22.7837
NIST614_05		7440.87	134825	119220	289284	68028.1	204626	0.332451	1.61691	0.280403	0.843442	1.46295	0.934466	0.872632	0.244488	82.2066	0.965919	0.683549	0.934466	0.967436	5045.17	6.92643	3357.96	48.7318	4489.34	19.1972
NIST614_06		7617.18	140323	122930	299872	63344	209677	0.302103	1.67582	0.261096	0.864261	1.44216	0.930641	0.871031	0.220768	83.2387	0.956468	0.693403	0.930641	0.972997	5042.57	6.25514	3395.59	48.9448	4501.86	19.0139
NIST614_01		7819.2	141230	123126	300129	64081.7	208189	0.307805	1.57569	0.252773	0.82121	1.38134	1.22264	0.870373	0.436291	86.8383	1.29815	0.723936	1.22264	0.941831	5041.5	12.3622	3510.78	65.8573	4544.34	25.7334
NIST614_02		7602.4	138739	120830	294408	62652.5	207332	0.302185	1.54636	0.247135	0.817828	1.3942	1.22579	0.869621	0.44241	85.963	1.30319	0.717258	1.22579	0.940612	5040.27	12.5363	3485.76	65.6736	4534.18	25.829
NIST614_03		7758.86	137775	120819	293934	61097.4	206862	0.295353	1.54232	0.241001	0.815975	1.39826	1.25047	0.875748	0.450554	86.3171	1.32916	0.715174	1.25047	0.940795	5050.22	12.7615	3477.93	66.8758	4538.3	26.3384
NIST614_04		7183.06	129889	113596	279491	89226.1	194882	0.457846	1.45982	0.351956	0.768721	1.39448	1.22986	0.866996	0.441503	85.686	1.30671	0.717112	1.22986	0.941191	5035.99	12.5129	3485.21	65.8826	4530.94	25.8969
NIST614_05		7037.25	127513	112621	273481	86298.6	191632	0.450335	1.4337	0.340408	0.7559	1.39301	1.24052	0.872077	0.451365	86.2792	1.32008	0.717869	1.24052	0.939728	5044.27	12.7878	3488.06	66.4913	4537.86	26.1607
NIST614_06		6754.32	123872	107093	262956	80712.9	183770	0.439205	1.37872	0.318375	0.724889	1.39222	1.23326	0.867586	0.47055	85.8835	1.31998	0.718276	1.23326	0.934302	5036.95	13.3356	3489.58	66.1261	4533.25	26.1574
NIST614_01		1749.99	30532.8	23261.3	56817.2	36391.9	45034.2	0.808095	0.28227	0.145364	0.179885	1.47843	1.16067	0.863526	0.614163	80.4973	1.31315	0.676394	1.16067	0.883886	5030.3	17.4106	3330.51	60.0975	4468.26	26.0039
NIST614_02		3567.16	64191.6	56310.9	136415	58441.7	92637.1	0.630867	0.655631	0.23344	0.37003	1.43249	1.24321	0.871241	0.621618	83.8211	1.38995	0.698087	1.24321	0.894423	5042.91	17.6124	3413.39	65.5589	4508.85	27.5177
NIST614_03		7507.63	138042	121340	296271	97367.1	211663	0.46001	1.41798	0.388924	0.845468	1.50414	1.07776	0.873527	0.456272	80.0375	1.17036	0.664831	1.07776	0.920876	5046.62	12.9255	3285.89	55.2521	4462.52	23.2068
NIST614_04		8052.11	151381	131595	322269	89021.5	212603	0.418722	1.54453	0.355588	0.849222	1.39142	1.40014	0.863821	0.535565	85.56	1.49907	0.718689	1.40014	0.934003	5030.79	15.1822	3491.13	75.0467	4529.46	29.6537
NIST614_05		8425.28	153791	135280	327784	106678	224461	0.475263	1.57416	0.426117	0.89659	1.46215	1.07004	0.874084	0.463401	82.3888	1.16607	0.683926	1.07004	0.917644	5047.52	13.127	3359.41	55.7895	4491.56	23.1307
NIST614_06		7739.68	139613	122101	295423	94487.8	207222	0.455974	1.42177	0.377423	0.827729	1.50139	1.06171	0.871705	0.442826	80.0168	1.15036	0.666049	1.06171	0.92294	5043.66	12.5462	3290.6	54.4926	4462.26	22.8146
NIST614_07		8198	149137	130899	319970	106322	220946	0.481214	1.53116	0.424695	0.882549	1.45667	1.08208	0.874559	0.448362	82.7436	1.1713	0.686498	1.08208	0.923835	5048.29	12.7005	3369.25	56.5402	4495.87	23.2344
NIST614_08		8014.27	148087	129854	315504	112195	218304	0.513942	1.51442	0.448154	0.871994	1.4718	1.06312	0.872765	0.441022	81.7246	1.15097	0.679438	1.06312	0.923676	5045.38	12.4942	3342.2	55.2148	4483.44	22.8323
NIST614_09		4663.11	84581.8	74946.7	182385	54912.5	122173	0.449465	0.872533	0.219343	0.488008	1.50278	1.41539	0.875592	0.580509	80.2992	1.52981	0.665432	1.41539	0.925206	5049.96	16.4426	3288.22	72.5029	4465.79	30.2301
NIST614_01		8352.06	151470	132691	324021	100138	223176	0.448696	1.32465	0.33032	0.736177	1.40617	1.12081	0.868884	0.429435	85.1592	1.20026	0.711154	1.12081	0.933805	5039.07	12.1692	3462.81	59.7778	4524.75	23.8103
NIST614_02		7990.2	143890	126220	306740	104206	214656	0.485456	1.25641	0.343738	0.708072	1.43526	1.1381	0.869669	0.447036	83.508	1.22275	0.696736	1.1381	0.930772	5040.35	12.6673	3408.26	59.9738	4505.1	24.2456
NIST614_03		9986.16	175471	156434	373076	106878	255991	0.417505	1.53548	0.35255	0.844422	1.39797	1.18393	0.877124	0.765868	86.471	1.41005	0.715325	1.18393	0.839637	5052.44	21.6905	3478.5	63.3427	4540.09	27.9201
NIST614_05		7499.36	138291	121462	296838	100145	199800	0.501226	1.21228	0.330341	0.659066	1.39144	1.17867	0.871156	0.449083	86.2853	1.26133	0.718679	1.17867	0.934471	5042.77	12.724	3491.1	63.234	4537.93	25.0106
NIST614_06		6670.67	124082	108840	263133	90567.9	182037	0.497523	1.08043	0.29875	0.600475	1.40631	1.16225	0.870517	0.447005	85.3106	1.24524	0.711082	1.16225	0.933349	5041.73	12.6657	3462.54	61.9735	4526.53	24.6923
NIST614_07		6816.17	121526	105012	251625	98487.7	171798	0.573277	1.04146	0.324875	0.566698	1.36995	2.35816	0.868242	0.47629	87.3456	2.40578	0.729952	2.35816	0.980207	5038.02	13.4976	3533.24	127.027	4550.19	47.189
NIST614_08		5954.38	103826	90742.5	220704	105118	156406	0.672088	0.904484	0.346747	0.515925	1.41476	1.17389	0.86489	0.511549	84.2531	1.2805	0.706836	1.17389	0.916737	5032.54	14.5003	3446.52	62.3732	4514.01	25.3792
NIST614_09		4341.77	80889.9	71173	172305	72125.9	121353	0.594348	0.706489	0.237917	0.4003	1.42669	1.22403	0.872717	0.481086	84.3043	1.31518	0.700923	1.22403	0.930695	5045.31	13.6292	3424.15	64.7059	4514.62	26.0578
NIST614_01		8309.27	143974	126501	308238	92156	208795	0.44137	1.95753	0.414354	0.938789	1.36191	1.32877	0.867869	0.552446	87.8237	1.43904	0.734263	1.32877	0.923375	5037.41	15.6562	3549.28	72.1279	4555.67	28.491
NIST614_02		7556.63	134918	118435	288909	78515.7	205879	0.381369	1.83423	0.353024	0.925675	1.41994	1.12633	0.873076	0.478855	84.7401	1.2239	0.704257	1.12633	0.920283	5045.89	13.5657	3436.77	59.7306	4519.8	24.2722
NIST614_03		6961.19	127085	111583	271281	77802.3	194008	0.401025	1.72493	0.349816	0.872304	1.43989	1.1336	0.871643	0.455256	83.4286	1.2216	0.694497	1.1336	0.927963	5043.56	12.8985	3399.75	59.625	4504.14	24.2228
NIST614_04		6680.45	121846	105942	260266	97486.8	191879	0.508064	1.65087	0.438322	0.862731	1.46414	1.12782	0.868754	0.469422	81.7751	1.22161	0.682996	1.12782	0.923223	5038.86	13.3025	3355.85	58.7412	4484.06	24.2172
NIST614_05		6260.09	114203	100101	243151	91046	175433	0.518978	1.54737	0.409363	0.788787	1.44033	1.05778	0.869504	0.439244	83.1984	1.14535	0.694285	1.05778	0.92354	5040.08	12.4467	3398.94	55.6441	4501.37	22.727
NIST614_06		6673.45	115663	100818	248228	94046.8	175079	0.537168	1.5719	0.422855	0.787193	1.42052	1.05062	0.871553	0.437186	84.5576	1.13796	0.703968	1.05062	0.923256	5043.42	12.3866	3435.68	55.7197	4517.63	22.586
NIST614_01		7525.08	140785	123022	299709	84913.2	218095	0.389341	1.849	0.339706	0.872517	1.40099	1.27018	0.868105	0.458703	85.3973	1.35047	0.713783	1.27018	0.940548	5037.8	12.9993	3472.7	67.8479	4527.55	26.7519
NIST614_02		7534.47	135889	119190	290814	81620.9	212190	0.38466	1.79117	0.326535	0.848893	1.40246	1.27595	0.872765	0.455505	85.7656	1.35482	0.713033	1.27595	0.941787	5045.38	12.9045	3469.88	68.1132	4531.87	26.8384
NIST614_03		7451.64	130113	114057	280587	83002.7	207032	0.400917	1.72182	0.332063	0.82826	1.40895	1.25131	0.868762	0.466456	84.9792	1.33542	0.70975	1.25131	0.937013	5038.87	13.2185	3457.52	66.6254	4522.62	26.4562
NIST614_04		7736.08	138841	122497	299580	92165.5	220055	0.418829	1.84047	0.36872	0.88036	1.41015	1.29068	0.876502	0.479524	85.6629	1.37688	0.709144	1.29068	0.937395	5051.43	13.5814	3455.23	68.6765	4530.67	27.2692
NIST614_05		7723.87	141016	123560	297134	88986.1	220494	0.403577	1.84307	0.356001	0.882113	1.39826	1.27793	0.87117	0.48017	85.8661	1.36516	0.715177	1.27793	0.936101	5042.79	13.6048	3477.94	68.3369	4533.04	27.0408
NIST614_06		7889.68	142867	123742	303465	89347.1	219544	0.406967	1.87052	0.357445	0.878314	1.3805	1.28454	0.864076	0.502395	86.2622	1.37929	0.724373	1.28454	0.931304	5031.21	14.2416	3512.42	69.1978	4537.66	27.3183
NIST614_07		7862.79	141538	123684	300428	100404	217709	0.461186	1.85599	0.40168	0.870973	1.36367	1.2965	0.870682	0.571106	87.9946	1.41671	0.733315	1.2965	0.915147	5042	16.1818	3545.76	70.3335	4557.62	28.0556
NIST614_08		7598.89	140185	122572	298484	103894	217290	0.478134	1.84153	0.41564	0.869295	1.39468	1.24978	0.869355	0.453409	85.9069	1.32948	0.71701	1.24978	0.940048	5039.84	12.8482	3484.83	66.9385	4533.52	26.3433
NIST614_09		7843.62	137812	120243	290700	97371.6	212684	0.457824	1.80056	0.389548	0.850868	1.37368	1.28586	0.870721	0.49302	87.357	1.37714	0.727969	1.28586	0.93372	5042.06	13.9693	3525.85	69.467	4550.32	27.2802
NIST614_10		7707.11	136052	118776	288238	101508	212111	0.478561	1.78189	0.406096	0.848577	1.39872	1.24734	0.869687	0.44604	85.6918	1.32469	0.714942	1.24734	0.941608	5040.38	12.6391	3477.06	66.6969	4531	26.2489
NIST614_11		7781.63	139424	122150	297411	101198	218694	0.462741	1.83413	0.404857	0.874912	1.40483	1.23227	0.874502	0.455094	85.7911	1.31362	0.711829	1.23227	0.938072	5048.2	12.8913	3465.35	65.7286	4532.17	26.0327
NIST614_12		7961.3	142364	123572	304831	94163.8	218258	0.431433	2.51434	0.569709	1.32051	1.39958	1.2074	0.865148	0.497891	85.192	1.30603	0.714501	1.2074	0.924482	5032.96	14.1129	3475.4	64.5487	4525.13	25.882
NIST614_01		4124.48	78648.2	68892	166584	46410.1	121323	0.382535	1.38378	0.28079	0.734025	1.3963	1.1887	0.87016	0.50427	85.8868	1.29124	0.716179	1.1887	0.920589	5041.15	14.2886	3481.71	63.6405	4533.29	25.5949
NIST614_02		4312.2	78493.8	69028.6	166222	44129.7	121730	0.362521	1.3821	0.266993	0.736489	1.40796	1.15209	0.870852	0.493453	85.2433	1.25332	0.710248	1.15209	0.919232	5042.28	13.9814	3459.39	61.3927	4525.74	24.8503
NIST614_03		4343.37	76929.9	67729.9	163154	43714.4	119678	0.365267	1.35598	0.26448	0.724075	1.40158	1.18376	0.87358	0.538685	85.8994	1.30057	0.713479	1.18376	0.910189	5046.71	15.2601	3471.56	63.2388	4533.43	25.7776
NIST614_04		3914.02	68884.8	60853.1	147962	40716.7	109052	0.373368	1.22332	0.246344	0.659788	1.42294	1.16561	0.871062	0.550655	84.3661	1.28913	0.70277	1.16561	0.90418	5042.62	15.602	3431.15	61.7273	4515.36	25.5485
NIST614_05		3773.98	69510	60616.8	147390	40455	109799	0.368448	1.22252	0.24476	0.664302	1.42788	1.15708	0.870231	0.512804	83.9939	1.26563	0.700337	1.15708	0.914238	5041.26	14.5304	3421.93	61.1538	4510.92	25.087
NIST614_06		3895.61	69771.8	61099.9	148057	41110.6	109170	0.376576	1.22873	0.248727	0.660496	1.41837	1.18114	0.866516	0.52252	84.1965	1.29156	0.705036	1.18114	0.914509	5035.2	14.8095	3439.72	62.6635	4513.34	25.5953
NIST614_01		3456.51	61378.7	54031.4	130715	75952.1	94343.8	0.805057	1.55885	0.623433	0.774397	1.39633	1.04076	0.872408	0.459938	86.1069	1.13786	0.716164	1.04076	0.914665	5044.8	13.0304	3481.65	55.7538	4535.85	22.5889
NIST614_02		3510.78	60687.2	53287.2	129535	77755.9	94929.4	0.819092	1.54229	0.638239	0.779204	1.4207	1.04618	0.867368	0.465416	84.1407	1.14504	0.703876	1.04618	0.913667	5036.6	13.1903	3435.33	55.481	4512.67	22.7237
NIST614_03		3250.07	60755.8	54030	130387	77023.5	95377.1	0.807569	1.55282	0.632228	0.782878	1.41546	1.0494	0.880158	0.496185	85.6974	1.16079	0.706482	1.0494	0.904038	5057.33	14.0497	3445.18	55.7711	4531.07	23.0378
NIST614_04		3232.94	59268.7	52272.8	125460	66350.8	85843.5	0.772928	1.50107	0.544623	0.704624	1.36972	1.07818	0.869707	0.502863	87.5076	1.18968	0.730074	1.07818	0.906275	5040.41	14.2492	3533.69	58.3945	4552.05	23.61
NIST614_05		3236.13	58502.2	51524.7	123982	65068.3	86118.1	0.75557	1.48211	0.534096	0.706878	1.38939	1.08247	0.865664	0.485515	85.8677	1.18637	0.719738	1.08247	0.912424	5033.81	13.7616	3495.06	58.1455	4533.06	23.54
NIST614_06		3298.26	59979.9	52711.1	128222	67663.3	88143.6	0.767649	1.52584	0.555396	0.723504	1.3902	1.06312	0.869102	0.476199	86.1584	1.1649	0.719319	1.06312	0.912629	5039.42	13.4942	3493.49	57.0915	4536.45	23.1197
NISt614_01		5584.12	101752	89043.4	214222	115888	152798	0.758442	1.94375	0.679585	0.896027	1.40501	0.87425	0.873516	0.464279	85.6838	0.989882	0.711741	0.87425	0.883185	5046.6	13.1524	3465.02	46.6975	4530.91	19.6784
NISt614_02		5900.26	103677	90666.8	218771	108280	154814	0.699418	1.98261	0.63497	0.907855	1.40011	0.898736	0.873654	0.489001	85.9972	1.02316	0.714231	0.898736	0.878396	5046.83	13.8526	3474.39	48.0982	4534.57	20.3341
NISt614_03		5765.76	104360	91147.5	219916	122040	156403	0.78029	1.99369	0.71566	0.917172	1.40452	0.885754	0.868857	0.457268	85.2563	0.996822	0.711988	0.885754	0.888578	5039.03	12.958	3465.95	47.3193	4525.89	19.8139
NIST614_04		5481.17	98601.1	85967.2	207899	121196	142085	0.852986	1.88352	0.710713	0.833206	1.34969	0.849075	0.869514	0.467366	88.7867	0.969206	0.74091	0.849075	0.876053	5040.1	13.2435	3573.94	46.4215	4566.62	19.2789
NIST614_05		5375.06	97413.2	85158.9	206403	119560	141698	0.843766	1.86676	0.701118	0.83094	1.35789	0.845076	0.867457	0.461884	88.042	0.963063	0.736438	0.845076	0.877488	5036.74	13.0901	3557.36	46.0435	4558.16	19.1561
NIST614_06		5481.87	100951	88082.7	213531	124289	150102	0.828031	1.93198	0.728849	0.880219	1.38859	0.850192	0.871348	0.428866	86.4817	0.952236	0.720156	0.850192	0.892838	5043.08	12.151	3496.63	45.7281	4540.21	18.9389
NIST614_07		5611.27	104869	91415.4	221089	125166	155718	0.803797	2.00305	0.733991	0.913155	1.39291	0.855825	0.868455	0.436121	85.9268	0.960541	0.717919	0.855825	0.890983	5038.37	12.3591	3488.24	45.947	4533.75	19.1011
NIST614_01		3235.62	59469.8	51946.6	126456	72264	91904.8	0.786292	1.42147	0.602973	0.766856	1.40073	1.16582	0.871837	0.474386	85.7799	1.25864	0.713911	1.16582	0.926252	5043.88	13.4402	3473.19	62.3066	4532.04	24.9562
NIST614_02		3304.5	59967.7	52947	128251	72242	93040.3	0.776459	1.44114	0.60279	0.776331	1.39852	1.16614	0.874743	0.479757	86.202	1.26097	0.715041	1.16614	0.924794	5048.59	13.5897	3477.43	62.3808	4536.96	25.0033
NIST614_03		3409.88	59515.2	51887.9	125572	71995.4	91566.9	0.786259	1.4161	0.600731	0.764037	1.39027	1.16561	0.86462	0.494983	85.7101	1.26635	0.719285	1.16561	0.920445	5032.1	14.031	3493.37	62.5669	4531.22	25.1071
NIST614_01		4108.87	75759	65904.9	160435	85388.5	116083	0.735582	1.59781	0.565253	0.768443	1.3952	1.07683	0.863397	0.491413	85.2867	1.18366	0.716745	1.07683	0.909747	5030.09	13.931	3483.84	57.7045	4526.25	23.4851
NIST614_02		4063.87	75295.9	66054.8	159091	87876.7	117498	0.747898	1.58904	0.581724	0.777813	1.42575	1.06013	0.870611	0.482467	84.1562	1.16476	0.701384	1.06013	0.910176	5041.88	13.6704	3425.89	56.1011	4512.86	23.1107
NIST614_03		4271.06	76265.7	66897.1	161383	86720.6	118361	0.732676	1.61075	0.574071	0.783526	1.41827	1.08431	0.875102	0.551182	85.0366	1.21636	0.705084	1.08431	0.89144	5049.17	15.6125	3439.9	57.5518	4523.3	24.1255
NIST614_04		3949.48	70607.4	62069.2	150717	77988.6	104606	0.745548	1.49887	0.516267	0.692466	1.40821	1.10347	0.867785	0.484903	84.9279	1.20531	0.71012	1.10347	0.915506	5037.28	13.7422	3458.91	58.8073	4522.02	23.9085
NIST614_05		4027.71	72411.3	63736.1	152670	78620.4	107916	0.728533	1.52756	0.520449	0.71438	1.41054	1.09049	0.867769	0.496137	84.7862	1.19805	0.708949	1.09049	0.910222	5037.25	14.0605	3454.49	58.0628	4520.34	23.7656
NIST614_06		4175.54	72587.3	63414.8	153208	79464.3	107993	0.73583	1.52963	0.526036	0.714888	1.42584	1.06773	0.870732	0.48844	84.1625	1.17415	0.70134	1.06773	0.909367	5042.08	13.8395	3425.73	56.4993	4512.93	23.2949
NIST614_01		4286.27	78306.7	68636	166511	95771	119946	0.79845	1.71427	0.718663	0.900073	1.38839	1.04361	0.868915	0.470549	86.2526	1.14479	0.72026	1.04361	0.911619	5039.12	13.3343	3497.02	56.0908	4537.55	22.7253
NIST614_02		4920.46	88680.5	77879.7	187359	103071	133874	0.769914	1.87188	0.773444	1.00459	1.36818	1.07439	0.871682	0.56992	87.805	1.21619	0.730895	1.07439	0.883405	5043.62	16.1471	3536.75	58.2279	4555.46	24.1308
NIST614_03		4696.39	81992.7	71878.7	174094	99008.7	125554	0.788576	1.73462	0.742958	0.942152	1.38115	1.06026	0.870023	0.49657	86.8149	1.17079	0.724032	1.06026	0.9056	5040.93	14.0706	3511.14	57.1542	4544.07	23.2373
NIST614_04		3128.3	53334.2	47457.8	113800	60259.5	75690.5	0.796131	1.13498	0.452186	0.567979	1.35338	1.16293	0.87206	0.505121	88.804	1.26789	0.738891	1.16293	0.917214	5044.24	14.3108	3566.46	63.3973	4566.82	25.1472
NIST614_05		3410.57	60549.6	53275.2	129146	66957.6	84150.8	0.795685	1.28508	0.502447	0.631465	1.33946	1.20264	0.873647	0.499077	89.8903	1.30208	0.746571	1.20264	0.923628	5046.81	14.138	3594.87	65.9396	4579.03	25.8203
NIST614_06		4473.66	79297.8	69421.5	168379	88581.1	115236	0.768696	1.67713	0.66471	0.864724	1.41161	1.03452	0.866074	0.453838	84.5562	1.12969	0.70841	1.03452	0.915756	5034.48	12.8633	3452.46	55.0712	4517.61	22.4238
NIST614_01		3560.11	64318.8	56198.8	136437	74494.6	87140.3	0.854881	1.82574	0.711151	0.831872	1.39045	0.970884	0.867899	0.419136	86.0242	1.05749	0.719193	0.970884	0.9181	5037.46	11.8782	3493.02	52.1529	4534.89	21.0096
NIST614_02		3464.78	63566	55624.5	135337	73461.5	86034.3	0.853863	1.80849	0.701289	0.821313	1.39068	1.00765	0.869022	0.40795	86.1208	1.0871	0.71907	1.00765	0.926917	5039.3	11.5603	3492.56	54.1141	4536.02	21.5918
NIST614_03		3471.39	62141	54311.7	132217	71806	84555.7	0.849216	1.76687	0.685485	0.807198	1.40176	0.972337	0.868379	0.421742	85.3772	1.05986	0.713389	0.972337	0.917419	5038.25	11.9517	3471.22	51.9856	4527.31	21.0543
NIST614_04		3496.17	62654.7	55215.4	133259	72526.9	85121.2	0.852043	1.78435	0.692367	0.812596	1.39824	0.997415	0.873137	0.399606	86.0613	1.07449	0.715187	0.997415	0.928271	5045.99	11.3206	3477.98	53.3989	4535.32	21.3438
NIST614_05		3497.79	63484.1	55558.5	134494	71061.6	85215.8	0.833903	1.80145	0.678379	0.813499	1.37846	0.994434	0.868326	0.409037	86.8151	1.07527	0.725448	0.994434	0.924821	5038.16	11.5917	3516.43	53.6808	4544.08	21.3613
NIST614_06		3535.79	62483	54891.4	133040	69534.7	84613.1	0.821796	1.77927	0.663802	0.807745	1.38825	0.995925	0.875636	0.382531	86.9286	1.06686	0.720332	0.995925	0.933508	5050.04	10.835	3497.29	53.5415	4545.39	21.1963
WC1_01		394.19	54512.6	7240.01	11612.3	582.72	1286247	0.000453039	0.216574	0.00244528	5.39751	22.7486	1.13496	0.132625	0.767687	0.803481	1.37021	0.0439588	1.13496	0.82831	2133.01	26.8648	277.325	6.1586	598.791	12.3218
WC1_02		bd	49583	6374.25	9956.87	380.335	1159497	0.000328017	0.194579	0.00159601	4.86562	22.5693	1.1688	0.127254	0.777497	0.777069	1.40378	0.0443081	1.1688	0.832609	2060.38	27.4317	279.481	6.39036	583.81	12.3897
WC1_03		301.731	55568.8	6822.45	10477.3	269.223	1354015	0.000198833	0.215109	0.00112974	5.68188	23.3277	1.15243	0.122769	0.795003	0.725307	1.40005	0.0428675	1.15243	0.823138	1996.85	28.255	270.583	6.10459	553.795	11.8827
WC1_04		bd	50803.4	6774.18	10894.8	382.716	1186998	0.000322423	0.202131	0.001606	4.98103	22.3985	1.1871	0.128404	0.841888	0.79007	1.45533	0.0446459	1.1871	0.815693	2076.23	29.6501	281.567	6.53777	591.212	12.9611
WC1_05		311.807	50940.2	6678.23	10528.9	296.193	1187580	0.000249409	0.201172	0.00124292	4.98347	22.6558	1.14184	0.129918	0.729774	0.790304	1.35513	0.0441388	1.14184	0.842608	2096.85	25.6418	278.436	6.22023	591.344	12.076
WC1_06		337.318	48663.6	6064.27	9375.36	296.959	1133335	0.000262023	0.189234	0.00124614	4.75584	22.43	1.14748	0.12265	0.829209	0.753604	1.41573	0.0445831	1.14748	0.810519	1995.13	29.4766	281.179	6.31112	570.313	12.2807
WC1_07		bd	39917.8	5198.99	8281.42	254.974	907106	0.000281085	0.157632	0.00106995	3.80651	21.8714	1.17902	0.128392	0.868272	0.809037	1.46424	0.0457218	1.17902	0.805213	2076.08	30.5798	288.202	6.64283	601.914	13.2118
WC1_08		bd	46632.4	5998.81	9373.49	298.625	1067516	0.000279738	0.183039	0.00125313	4.47964	22.0251	1.19497	0.127995	0.926272	0.800903	1.51193	0.0454027	1.19497	0.790361	2070.61	32.6428	286.235	6.68773	597.338	13.5637
WC1_09		367.736	45854.4	5490.98	8272.67	213.934	1070591	0.000199828	0.175993	0.000897736	4.49255	22.4021	1.13817	0.118762	0.76287	0.730624	1.37019	0.0446386	1.13817	0.830671	1937.68	27.3014	281.521	6.26744	556.919	11.6797
WC1_10		482.24	55565	7859	13036.1	243.069	1271872	0.000191111	0.225711	0.00102	5.33719	22.191	1.16411	0.138079	0.637407	0.857544	1.32719	0.0450633	1.16411	0.877121	2203.25	22.1336	284.141	6.46849	628.781	12.3669
WC1_11		bd	54010	6654.84	10408.1	316.085	1284470	0.000246082	0.209808	0.0013264	5.39005	22.868	1.13546	0.122248	0.66344	0.736747	1.31508	0.0437292	1.13546	0.863419	1989.29	23.5999	275.907	6.13053	560.505	11.2663
WC1_12		bd	58114.7	7537.28	11927.8	224.021	1389005	0.000161282	0.229017	0.000940064	5.82871	23.0018	1.1494	0.129038	0.742563	0.773146	1.3684	0.0434748	1.1494	0.839958	2084.91	26.1263	274.336	6.17115	581.566	12.0451
WC1_01		323.613	54998.8	7646.64	12733.6	201.705	1249357	0.000161447	0.224323	0.000831401	5.14969	21.8712	0.952933	0.139942	0.609426	0.881824	1.13114	0.0457222	0.952933	0.842452	2226.49	21.1086	288.204	5.36958	641.967	10.7075
WC1_02		318.363	56169.9	7952.05	13492	204.879	1273133	0.000160925	0.230974	0.000844486	5.24769	21.9147	0.953592	0.139096	0.659142	0.874753	1.15923	0.0456314	0.953592	0.822611	2215.99	22.8566	287.645	5.3631	638.145	10.9252
WC1_03		bd	52855	6268.06	9376.51	137.419	1238448	0.00011096	0.20385	0.000566422	5.10472	22.3454	1.01837	0.118808	0.753435	0.732767	1.26678	0.044752	1.01837	0.803902	1938.38	26.9615	282.221	5.62165	558.176	10.8211
WC1_04		325.287	52509	6534.71	10030.9	222.749	1241600	0.000179405	0.205561	0.000918143	5.11771	22.7857	0.99524	0.122613	0.533836	0.741618	1.12937	0.0438871	0.99524	0.881232	1994.6	18.9779	276.882	5.39235	563.349	9.71952
WC1_05		bd	47900.1	4201.71	4439.16	190.466	1172184	0.000162488	0.168262	0.000785075	4.83159	23.5099	1.00651	0.0872702	1.42688	0.511589	1.74615	0.0425353	1.00651	0.576418	1366.47	54.9459	268.529	5.29235	419.517	11.931
WC1_06		323.982	45400.2	5554.05	8636.94	132.376	1052602	0.000125761	0.17734	0.000545636	4.33869	22.5198	0.964278	0.120462	0.567201	0.737212	1.11873	0.0444054	0.964278	0.861943	1963.08	20.2383	280.082	5.28372	560.778	9.59555
WC1_07		312.175	50990.8	6757.75	10647	219.498	1194692	0.000183728	0.203541	0.000904742	4.92437	22.551	0.974426	0.129937	0.54308	0.794095	1.11555	0.0443439	0.974426	0.873497	2097.11	19.0814	279.702	5.33221	593.492	9.97789
WC1_08		bd	41102.2	4309.77	5835.4	62.8152	982152	6.39567e-05	0.152509	0.000258916	4.0483	23.247	0.99355	0.103155	0.781214	0.611545	1.2639	0.0430163	0.99355	0.7861	1681.65	28.8493	271.502	5.28082	484.534	9.69355
WC1_09		bd	54501.7	5678.21	7441.72	146.242	1323649	0.000110484	0.201237	0.000602789	5.45591	23.4393	0.967634	0.101852	0.606238	0.598867	1.14186	0.0426634	0.967634	0.84742	1658.14	22.4548	269.321	5.10269	476.515	8.64847
WC1_10		303.741	51714	6436.97	10098	203.889	1214417	0.00016789	0.203104	0.000840403	5.00567	22.8299	0.94873	0.123974	0.75322	0.748397	1.21137	0.0438022	0.94873	0.783185	2014.19	26.7163	276.358	5.13093	567.294	10.4758
WC1_11		bd	54517.9	6903.84	11053.7	161.085	1280832	0.000125766	0.215682	0.000663973	5.27942	22.7796	0.960104	0.125017	0.709225	0.756362	1.19365	0.043899	0.960104	0.804343	2029.04	25.1128	276.956	5.2034	571.909	10.3856
WC1_12		bd	55387.5	6611.83	9782.02	508.907	1333432	0.000381652	0.213616	0.00209765	5.49623	23.3084	0.953628	0.118034	0.858824	0.697915	1.28335	0.042903	0.953628	0.743077	1926.68	30.7754	270.802	5.05593	537.545	10.6564
WC1_01		419.523	48869.5	7220.27	12466.2	229.366	1107664	0.000207072	0.191366	0.000904743	4.36922	21.1289	1.24245	0.148897	0.819601	0.971212	1.48843	0.0473285	1.24245	0.834738	2333.29	28.0669	298.099	7.23474	689.088	14.7844
WC1_02		344.905	52744.7	7042.65	11290.9	178.226	1227685	0.000145173	0.198406	0.000703021	4.84265	21.6457	1.24543	0.132503	0.73052	0.843645	1.44387	0.0461987	1.24543	0.862564	2131.39	25.5688	291.141	7.08668	621.155	13.3295
WC1_03		412.921	58781.9	8202.74	13587.6	741.279	1396634	0.000530761	0.224908	0.002924	5.50908	21.7984	1.30693	0.141224	0.926689	0.892872	1.60213	0.0458748	1.30693	0.815746	2242.27	32.0428	289.145	7.38666	647.911	15.2323
WC1_04		bd	52179.8	6133.23	9175.93	124.219	1267422	9.80093e-05	0.188387	0.000489987	4.99939	22.5277	1.26504	0.117865	0.800816	0.721062	1.49721	0.0443898	1.26504	0.844933	1924.1	28.7055	279.986	6.92853	551.294	12.6593
WC1_05		bd	56458.7	7104.76	10829.2	449.234	1353304	0.000331954	0.207658	0.00177202	5.33816	22.2829	1.28208	0.124072	0.873356	0.767374	1.55129	0.0448774	1.28208	0.826465	2015.59	30.9724	282.995	7.09558	578.256	13.5869
WC1_06		539.422	70837.3	11271.4	19929.5	704.77	1643170	0.000428909	0.284827	0.00277999	6.48155	21.5688	1.25569	0.15779	0.632202	1.00823	1.40585	0.0463632	1.25569	0.893183	2432.12	21.4296	292.155	7.16932	707.98	14.2331
WC1_07		362.397	48476.3	6655.52	10615.5	289.845	1169887	0.000247755	0.183526	0.00114331	4.61466	22.5392	1.23252	0.13438	0.872368	0.821678	1.51001	0.0443672	1.23252	0.816232	2155.98	30.4503	279.846	6.74718	608.984	13.7381
WC1_08		366.135	46087.9	6151.99	10003.4	245.834	1126743	0.000218181	0.173745	0.000969703	4.44448	22.8463	1.24934	0.131733	0.707408	0.794666	1.43572	0.0437708	1.24934	0.870187	2121.19	24.7881	276.164	6.75122	593.815	12.8287
WC1_09		bd	54935.3	7087.74	11335.1	396.828	1358395	0.00029213	0.20477	0.0015653	5.35824	23.0344	1.26544	0.129232	0.835184	0.773211	1.5162	0.0434133	1.26544	0.83461	2087.54	29.3763	273.956	6.78464	581.604	13.3382
WC1_10		bd	43283.9	5369.83	8387.05	300.808	1061189	0.000283463	0.159222	0.00118655	4.1859	22.7251	1.26688	0.12229	0.831056	0.741635	1.51514	0.0440041	1.26688	0.836149	1989.9	29.5602	277.605	6.88086	563.359	13.0184
WC1_11		bd	49650.4	6136.85	9838	239.845	1231240	0.000194799	0.183185	0.000946077	4.85667	23.0494	1.26408	0.123595	0.822916	0.739006	1.50834	0.0433851	1.26408	0.838061	2008.76	29.2067	273.781	6.77316	561.826	12.9341
WC-1_01		422.688	53054.2	7938.1	13427.7	350.18	1134350	0.000308706	0.189913	0.00139876	4.53106	21.5268	1.05097	0.149351	0.729163	0.956171	1.27915	0.0464537	1.05097	0.821619	2338.51	24.9562	292.712	6.01227	681.311	12.6185
WC-1_02		443.746	58192.1	8991.1	15723.7	654.874	1273140	0.000514377	0.211571	0.00261583	5.08544	21.713	1.07269	0.153074	0.813169	0.971603	1.34607	0.0460554	1.07269	0.796905	2380.55	27.7099	290.259	6.08617	689.29	13.3823
WC-1_03		bd	61854	8862.88	14512.4	297.161	1357203	0.000218951	0.217498	0.00118698	5.42122	21.806	1.05933	0.142083	0.707987	0.897987	1.27414	0.0458589	1.05933	0.83141	2252.74	24.453	289.047	5.98588	650.651	12.1688
WC-1_05		373.192	57696.6	8428.74	14431.1	283.524	1245763	0.000227591	0.205573	0.00113251	4.97608	21.7495	1.03794	0.146005	0.644763	0.925179	1.2219	0.0459781	1.03794	0.849449	2299.66	22.1581	289.782	5.87967	665.095	11.8553
WC-1_06		455.927	58667	8056.06	13115.4	180.776	1305346	0.000138489	0.203741	0.000722092	5.21408	22.0506	1.06706	0.135926	0.761409	0.849547	1.31087	0.0453502	1.06706	0.814015	2175.92	26.5188	285.911	5.96561	624.4	12.1545
WC-1_07		328.85	57107.3	7616.67	12329.5	160.796	1274935	0.000126121	0.196634	0.000642284	5.09261	22.3904	1.05079	0.135006	0.700945	0.830989	1.26312	0.0446619	1.05079	0.831897	2164.09	24.4448	281.665	5.78936	614.161	11.5754
WC-1_08		372.963	53099.8	7116.8	11398.1	379.285	1171282	0.00032382	0.182755	0.00151502	4.67858	22.3387	1.04368	0.133176	0.811902	0.821627	1.32229	0.0447654	1.04368	0.789298	2140.26	28.3892	282.304	5.76297	608.956	12.04
WC-1_09		327.516	61587.8	8672.7	14392.4	374.806	1395797	0.000268525	0.216027	0.00149713	5.57538	22.7137	1.09382	0.140845	1.00602	0.854592	1.48611	0.0440263	1.09382	0.73603	2237.62	34.8034	277.742	5.94421	627.166	13.8122
WC-1_10		383.626	57429.9	8081.4	13475.9	209.714	1299547	0.000161374	0.201568	0.000837681	5.19092	22.4926	1.05345	0.140136	0.650725	0.858649	1.23822	0.0444591	1.05345	0.850775	2228.88	22.5332	280.414	5.77879	629.385	11.5506
WC-1_11		305.684	49166	7271.8	12387.2	168.076	1079377	0.000155716	0.175636	0.000671363	4.31147	21.9826	1.06077	0.148062	0.761644	0.92826	1.30588	0.0454905	1.06077	0.8123	2323.66	26.1086	286.776	5.94798	666.719	12.6868
WC-1_12		365.731	56589.8	8080.7	13343.5	222.904	1232514	0.000180853	0.199085	0.000890371	4.92316	21.7253	1.05059	0.141758	0.674461	0.899267	1.24846	0.0460293	1.05059	0.841513	2248.8	23.305	290.097	5.95761	651.336	11.9339
WC1_01		bd	64728.3	9528.61	16075.5	1122.75	1494730	0.000751142	0.196749	0.00370356	4.93057	22.2546	1.15452	0.145992	0.63146	0.904096	1.31593	0.0449345	1.15452	0.877345	2299.5	21.7013	283.347	6.39773	653.914	12.6101
WC1_02		486.604	68816.8	10894.1	19491	1134.44	1563219	0.000725709	0.216067	0.00374211	5.15649	21.533	1.15883	0.156599	0.775492	1.00228	1.39437	0.0464402	1.15883	0.831076	2419.27	26.3211	292.63	6.6271	704.967	14.0763
WC1_03		614.571	58553.5	9212.98	16278.8	392.396	1321188	0.000297002	0.183055	0.00129437	4.35812	21.5655	1.194	0.15371	0.707263	0.98231	1.38775	0.0463705	1.194	0.860384	2387.61	24.0835	292.2	6.81835	694.789	13.8701
WC1_04		725.996	90098	13611.3	23425.1	4983.43	2138893	0.00232991	0.276905	0.0164385	7.05543	22.887	1.19437	0.14777	1.37814	0.889823	1.82367	0.043693	1.19437	0.654924	2320.28	47.2585	275.683	6.44329	646.274	17.2897
WC1_05		512.298	59470.8	8705.94	14653.1	387.649	1333930	0.000290607	0.180407	0.00127871	4.40015	21.5596	1.15305	0.144465	0.695764	0.923482	1.3467	0.046383	1.15305	0.856201	2281.42	23.9572	292.277	6.58629	664.2	13.046
WC1_06		444.804	62217.9	8518.82	13730.2	194.033	1433591	0.000135348	0.183973	0.000640045	4.7289	21.9174	1.14742	0.135162	0.747207	0.84991	1.36927	0.0456259	1.14742	0.837982	2166.11	26.0523	287.611	6.45194	624.599	12.6956
WC1_07		349.464	60652	7769.09	12223.2	295.713	1406193	0.000210293	0.175647	0.00097545	4.63852	22.1442	1.13793	0.128439	0.716382	0.799363	1.34465	0.0451586	1.13793	0.846263	2076.72	25.2285	284.73	6.3359	596.469	12.059
WC1_08		410.613	64837.7	9019.56	14785.4	267.487	1523860	0.000175532	0.193068	0.000882342	5.02666	22.6588	1.13712	0.137862	0.630207	0.838521	1.30008	0.0441329	1.13712	0.874656	2200.52	21.8901	278.4	6.19377	618.329	11.9705
WC1_09		493.466	65009.9	9454.03	16132	2012.13	1510040	0.0013325	0.197323	0.00663728	4.98107	21.8883	1.17676	0.146335	0.798103	0.921388	1.42188	0.0456865	1.17676	0.82761	2303.53	27.4166	287.985	6.6252	663.094	13.7532
WC1_10		566.705	65291.4	9821.1	16900.2	583.97	1510499	0.000386607	0.200408	0.0019263	4.98259	22.1247	1.14706	0.149561	0.665341	0.931635	1.32606	0.0451983	1.14706	0.865017	2340.91	22.7662	284.974	6.3921	668.494	12.9057
WC1_11		412.125	66099.3	9104.22	14700.7	290.196	1533722	0.00018921	0.195816	0.00095725	5.05919	22.1026	1.18076	0.136759	0.598258	0.852745	1.32367	0.0452435	1.18076	0.892034	2186.56	20.8121	285.253	6.58608	626.154	12.2974
WC1_12		450.991	62730.6	10510	18852.3	770.363	1419469	0.000542712	0.200583	0.00254115	4.68231	21.3984	1.14187	0.161862	0.755137	1.04249	1.36898	0.0467324	1.14187	0.834104	2475.21	25.4854	294.429	6.5694	725.153	14.0913
WC1_01		bd	46947.3	5445.55	7910.66	103.447	1114069	9.2855e-05	0.20398	0.00046512	5.0091	22.3394	1.12955	0.115198	0.720736	0.710688	1.3399	0.0447639	1.12955	0.843007	1882.98	25.962	282.295	6.23667	545.155	11.2418
WC1_02		bd	49876.4	5829.72	8344.62	116.524	1229892	9.47431e-05	0.216655	0.000523917	5.52986	23.1326	1.04445	0.115339	0.704483	0.687161	1.25983	0.0432291	1.04445	0.82904	1885.19	25.3699	272.817	5.57755	531.093	10.367
WC1_03		bd	48325.1	5884.1	8544.02	46.4996	1148815	4.04761e-05	0.212266	0.000209072	5.16532	22.184	1.0705	0.120024	0.984289	0.745652	1.45424	0.0450776	1.0705	0.736128	1956.58	35.1472	284.23	5.95043	565.698	12.5369
WC1_04		bd	42324.9	5352.2	8196.89	137.906	1039859	0.00013262	0.188997	0.000620057	4.67543	22.7321	1.05147	0.123981	0.719766	0.751663	1.27423	0.0439907	1.05147	0.825184	2014.3	25.5294	277.522	5.70976	569.189	11.0437
WC1_05		bd	49333.4	5931.72	8972.05	131.139	1198688	0.000109402	0.217286	0.000589631	5.38956	22.8475	1.06454	0.118743	0.694003	0.716267	1.27078	0.0437685	1.06454	0.837705	1937.39	24.8377	276.149	5.75273	548.461	10.7134
WC1_06		bd	54997.2	5430.39	6542.91	67.1097	1382808	4.85315e-05	0.226531	0.00030174	6.21741	23.3959	1.05474	0.0969435	0.843119	0.571064	1.35031	0.0427425	1.05474	0.781113	1566.12	31.6035	269.81	5.57173	458.702	9.91884
WC1_07		bd	45639.8	5528.71	8061.88	76.1872	1108434	6.8734e-05	0.20035	0.000342554	4.98376	22.6073	1.06792	0.119921	0.727817	0.731057	1.29235	0.0442335	1.06792	0.826339	1955.04	25.9938	279.021	5.82968	557.174	11.0235
WC1_08		bd	44251.1	5259.31	7641.37	86.6986	1066058	8.13263e-05	0.193319	0.000389816	4.79323	22.5952	1.17568	0.115877	1.07854	0.706785	1.59545	0.0442571	1.17568	0.736894	1893.57	38.8014	279.167	6.4209	542.835	13.329
WC1_09		bd	55624.2	6595.28	9919.4	223.063	1382222	0.00016138	0.244014	0.00100294	6.21477	23.2357	1.08535	0.118629	0.61712	0.703626	1.24853	0.0430371	1.08535	0.869303	1935.68	22.0906	271.631	5.7712	540.954	10.4183
WC1_10		351.874	54693.6	7136.57	11468.9	193.517	1316082	0.00014704	0.247938	0.000870096	5.91739	22.6553	1.07155	0.130433	0.684887	0.79346	1.27173	0.0441398	1.07155	0.842594	2103.81	24.0458	278.442	5.83762	593.133	11.362
WC1_11		bd	51898.9	6582.17	10303.1	241.909	1290407	0.000187467	0.232666	0.00108768	5.80195	22.8571	1.12884	0.125786	0.668006	0.758433	1.31168	0.0437502	1.12884	0.860604	2039.89	23.6239	276.037	6.09758	573.106	11.4244
WC1_12		335.583	47424.4	5995.25	9121.74	120.45	1170483	0.000102907	0.21155	0.000541571	5.26275	23.0574	1.07958	0.125464	0.747219	0.749923	1.31294	0.0433701	1.07958	0.822256	2035.36	26.4389	273.689	5.78307	568.18	11.3624
WC1_01		331.291	63196.5	6781.14	9259.05	153.158	1591968	9.62069e-05	0.25999	0.00061273	6.36888	22.5433	1.2927	0.105289	0.789645	0.643682	1.5148	0.0443592	1.2927	0.853381	1719.36	29.0219	279.797	7.07524	504.583	11.9758
WC1_02		376.676	59745.1	7272.95	11337.4	173.635	1539259	0.000112804	0.257098	0.000694648	6.15801	22.8033	1.26454	0.121214	0.714295	0.73259	1.45234	0.0438533	1.26454	0.870694	1974.17	25.4537	276.674	6.84564	558.072	12.3948
WC1_03		bd	54512.2	6288.26	9030.4	103.857	1425851	7.28387e-05	0.229127	0.000415494	5.7043	23.0656	1.24853	0.113838	0.688767	0.680184	1.42591	0.0433546	1.24853	0.875601	1861.56	24.8745	273.593	6.68537	526.886	11.6554
WC1_04		bd	54201.4	6337.02	9152.57	130.972	1412600	9.27173e-05	0.228668	0.000523972	5.65129	23.2914	1.24275	0.116394	0.734641	0.688717	1.44365	0.0429343	1.24275	0.86084	1901.56	26.4041	270.996	6.59263	532.029	11.8867
WC1_05		bd	55487.1	6505.52	9672.61	206.492	1458218	0.000141606	0.235146	0.000826098	5.83379	23.3648	1.25017	0.117853	0.710766	0.695161	1.43809	0.0427995	1.25017	0.869324	1923.92	25.4782	270.162	6.61197	535.897	11.9062
WC1_06		bd	50265.7	5374.11	7138.96	128.857	1350433	9.54192e-05	0.205988	0.00051551	5.40258	23.9627	1.24254	0.106768	0.686295	0.614061	1.41947	0.0417314	1.24254	0.875352	1744.96	25.1427	263.556	6.4143	486.118	10.908
WC1_07		bd	39948.4	4354.17	6179.3	31.2762	1062836	2.94271e-05	0.16564	0.000125125	4.25201	23.662	1.26343	0.107101	0.859385	0.623807	1.528	0.0422619	1.26343	0.826849	1750.67	31.4615	266.838	6.60159	492.23	11.8512
WC1_08		bd	50240.2	6079.54	9346.06	103.158	1291610	7.98678e-05	0.215461	0.000412697	5.16725	22.884	1.235	0.119473	0.799201	0.719522	1.47104	0.0436987	1.235	0.839545	1948.36	28.5656	275.718	6.66322	550.385	12.424
WC1_09		bd	47407.3	5302.32	7476.74	152.244	1255682	0.000121244	0.197482	0.000609074	5.02352	23.5366	1.25933	0.110986	0.779314	0.649875	1.48096	0.0424869	1.25933	0.850347	1815.62	28.3022	268.23	6.61377	508.402	11.7777
WC1_10		bd	40445.1	4752.4	6663.63	92.4477	1083160	8.535e-05	0.170165	0.000369849	4.33332	23.5811	1.29046	0.115424	0.690578	0.674585	1.46362	0.0424069	1.29046	0.88169	1886.51	24.8652	267.735	6.76493	523.496	11.9033
WC1_11		bd	47536.1	5287.97	7785.59	105.38	1238524	8.50855e-05	0.198871	0.000421588	4.95488	23.2071	1.24793	0.111889	0.654845	0.664464	1.4093	0.0430903	1.24793	0.88549	1830.32	23.7392	271.96	6.64309	517.341	11.3613
WC1_12		bd	48593.6	5544.72	7953.91	192.567	1249804	0.000154078	0.203736	0.00077039	5	23.1001	1.2711	0.111531	0.730964	0.665405	1.46629	0.0432898	1.2711	0.866883	1824.51	26.5175	273.193	6.79643	517.915	11.8281
WC1_13		bd	45142.6	4525.26	5858.37	73.2118	1180093	6.2039e-05	0.182191	0.000292893	4.72112	23.2531	1.23186	0.0992538	0.900661	0.588264	1.52599	0.043005	1.23186	0.807248	1610.14	33.5671	271.432	6.54516	469.758	11.4135
WC1_14		bd	45905.6	4730.12	6382.07	196.6	1156308	0.000170023	0.187085	0.000786522	4.62596	22.5743	1.25962	0.103549	0.87016	0.632173	1.53096	0.0442982	1.25962	0.822768	1688.68	32.1052	279.42	6.88522	497.449	11.971
WC1_15		bd	41934.4	3953.29	4922.86	50.6311	1075547	4.70747e-05	0.166718	0.000202556	4.30287	22.9231	1.25671	0.0961839	1.15845	0.578276	1.70919	0.0436242	1.25671	0.735268	1551.37	43.5077	275.258	6.76923	463.353	12.6385
WC1_16		bd	24463.5	2309.41	2677.6	14.2314	624956	2.27718e-05	0.0966324	5.69344e-05	2.50022	22.8015	1.28291	0.0932501	1.17293	0.563626	1.73829	0.0438567	1.28291	0.738034	1492.97	44.3949	276.694	6.94555	453.884	12.6454
WC1_01		bd	34628.4	4789.09	7883.87	179.818	850211	0.000211498	0.208372	0.00108793	5.14394	22.0567	1.25719	0.13687	0.972762	0.855214	1.58959	0.0453377	1.25719	0.79089	2187.98	33.8351	285.834	7.02611	627.507	14.7728
WC1_02		bd	35170.6	4688.05	7454.59	370.428	871518	0.000425037	0.208424	0.00224116	5.27285	22.3363	1.19612	0.13229	0.885153	0.816249	1.48802	0.0447702	1.19612	0.803835	2128.59	30.9908	282.333	6.60495	605.953	13.4905
WC1_03		bd	32596.2	4711.9	7751.72	97.4647	773197	0.000126054	0.198497	0.00058968	4.67798	21.4889	1.25978	0.141943	1.23652	0.910348	1.76523	0.0465357	1.25978	0.713665	2251.05	42.7157	293.218	7.21827	657.242	16.9406
WC1_04		bd	31523.7	4336.09	7191.99	92.8217	775051	0.000119762	0.189652	0.000561589	4.6892	22.0273	1.27562	0.13513	0.846361	0.845462	1.53086	0.0453981	1.27562	0.833269	2165.69	29.5108	286.206	7.13812	622.155	14.1435
WC1_05		bd	33495.6	4565.48	7446.1	275.926	841691	0.000327823	0.200468	0.0016694	5.09239	22.3672	1.18388	0.135374	0.769809	0.834123	1.41215	0.0447084	1.18388	0.83835	2168.84	26.8323	281.952	6.52873	615.897	12.9589
WC1_06		bd	32430	4242.69	6820.96	137.249	796074	0.000172408	0.191598	0.000830383	4.8164	22.098	1.20076	0.130187	0.829158	0.811933	1.45922	0.045253	1.20076	0.822878	2100.48	29.1218	285.311	6.69893	603.538	13.1928
WC1_07		bd	32842.3	3837.53	5658.71	185.974	836601	0.000222297	0.18651	0.00112518	5.06159	22.8696	1.20763	0.11569	1.18449	0.697176	1.69156	0.0437262	1.20763	0.713916	1890.65	42.6278	275.888	6.51957	537.103	14.014
WC1_08		bd	30293.2	3271.81	4201.59	154.356	775156	0.000199129	0.166369	0.000933883	4.68984	23.1007	1.22613	0.106625	1.20141	0.636119	1.71662	0.0432887	1.22613	0.71427	1742.5	44.0277	273.186	6.55595	499.901	13.4641
WC1_09		bd	35930.3	5115.08	8190.45	162.243	904298	0.000179413	0.216893	0.000981598	5.47117	22.6451	1.30023	0.137474	1.22725	0.836663	1.78794	0.0441597	1.30023	0.727223	2195.62	42.651	278.565	7.08581	617.303	16.4067
WC1_10		bd	33636.2	5107.96	8792.01	139.522	780173	0.000178834	0.209406	0.000844132	4.72019	21.2854	1.24266	0.149478	0.985484	0.967839	1.586	0.0469806	1.24266	0.78352	2339.97	33.7239	295.958	7.18519	687.35	15.7184
WC1_11		bd	32876	4413.52	6944.01	185.056	833534	0.000222013	0.194857	0.00111962	5.04304	22.9299	1.18352	0.130744	0.921168	0.785825	1.49975	0.0436112	1.18352	0.78914	2107.98	32.3262	275.178	6.37333	588.801	13.3142
WC1_12		bd	25158.3	3585.26	6122.69	84.7806	637507	0.000132988	0.153593	0.000512939	3.85704	22.7554	1.23608	0.142144	0.8492	0.860893	1.49968	0.0439456	1.23608	0.824229	2253.49	29.328	277.244	6.70511	630.61	13.9923
WC1_13		300.307	36169.9	5069.72	8852.81	210.249	892513	0.00023557	0.220667	0.00127205	5.39987	22.2699	1.16878	0.139269	0.879388	0.861872	1.46266	0.0449037	1.16878	0.799079	2218.14	30.4868	283.157	6.47245	631.145	13.6575
WC1_14		331.239	34838.4	4952.18	8463.44	373.222	866133	0.000430906	0.212568	0.00225806	5.24027	22.4052	1.24099	0.141291	1.19526	0.869103	1.723	0.0446324	1.24099	0.720253	2243.09	41.3258	281.483	6.83242	635.08	16.1408
WC1_15		bd	33754.4	4775.14	8055.02	139.095	812937	0.000171101	0.205214	0.000841549	4.91842	21.5686	1.18365	0.141052	0.949166	0.901288	1.51721	0.0463637	1.18365	0.780146	2240.16	32.8275	292.158	6.75832	652.416	14.5017
WC1_16		306.879	34063	5152.37	8832.89	184.559	825966	0.000223447	0.211662	0.00111662	4.99725	21.9951	1.17518	0.149137	1.05349	0.934472	1.57826	0.0454646	1.17518	0.744607	2336.06	36.066	286.617	6.5856	669.985	15.3657
WC1_01		bd	17619.2	2770.51	4871.49	58.5938	414385	0.0001414	0.159994	0.000480952	3.40137	21.2139	1.22861	0.15473	1.23079	1.00522	1.73906	0.0471389	1.22861	0.706481	2398.87	41.8619	296.932	7.12686	706.454	17.5515
WC1_02		bd	29671.2	3207.74	4415	108.594	766105	0.000141748	0.236204	0.000891366	6.28837	23.5007	1.06121	0.108546	0.975893	0.63656	1.44171	0.042552	1.06121	0.736077	1775.16	35.6182	268.632	5.58194	500.174	11.3246
WC1_03		bd	26651.7	3114.14	4486.44	81.4518	684832	0.000118937	0.216939	0.000668576	5.62127	23.2877	1.12732	0.116666	0.828387	0.690433	1.39896	0.042941	1.12732	0.805831	1905.75	29.7586	271.037	5.98147	533.06	11.5377
WC1_04		bd	27805.2	3101.19	4246.72	171.875	723645	0.000237514	0.222645	0.0014108	5.93985	23.5606	1.06671	0.110681	0.932034	0.647431	1.41653	0.0424438	1.06671	0.753044	1810.63	33.8692	267.963	5.59714	506.897	11.2426
WC1_05		bd	28053.8	3333.54	5045.6	131.746	708796	0.000185874	0.230751	0.00108141	5.81797	23.0541	1.13157	0.11863	0.967417	0.709174	1.48874	0.0433763	1.13157	0.760087	1935.69	34.6298	273.727	6.06231	544.256	12.4674
WC1_06		bd	27820.7	3189.77	4691.23	86.9232	687755	0.000126387	0.226119	0.000713487	5.64526	22.6472	1.10794	0.113817	0.839511	0.692627	1.39008	0.0441555	1.10794	0.797037	1861.24	30.3198	278.54	6.03785	534.378	11.4863
WC1_07		bd	26821.4	3164.92	4597.88	100.794	660830	0.000152526	0.219042	0.000827341	5.42425	22.6544	1.05493	0.116392	1.03755	0.708073	1.47965	0.0441416	1.05493	0.712955	1901.54	37.2912	278.454	5.74733	543.601	12.3806
WC1_08		bd	27772.3	3642.1	5812.06	89.8439	655580	0.000137045	0.235777	0.000737461	5.38116	22.0222	1.13452	0.131457	1.2694	0.822675	1.7025	0.0454087	1.13452	0.666385	2117.52	44.4989	286.272	6.35038	609.54	15.4864
WC1_09		bd	27408.8	3171.4	4692.03	73.077	690231	0.000105873	0.223399	0.000599834	5.66558	23.0211	1.097	0.116006	1.07587	0.69448	1.53652	0.0434383	1.097	0.713951	1895.56	38.696	274.11	5.88523	535.488	12.7087
WC1_10		bd	25290.2	2584.26	3179.62	167.188	622000	0.000268791	0.196683	0.00137232	5.10553	23.0921	1.1154	0.102184	1.01436	0.609853	1.50766	0.0433049	1.1154	0.739821	1664.16	37.5426	273.286	5.96628	483.468	11.5328
WC1_11		bd	18966	2039.58	2747.32	3.78788	463365	8.17473e-06	0.150441	3.10918e-05	3.80341	23.0481	1.07297	0.106335	1.11859	0.635837	1.55	0.0433876	1.07297	0.69224	1737.5	41.018	273.797	5.74994	499.726	12.1617
WC1_12		bd	22362.4	2523.3	3561.93	170.162	540571	0.000314782	0.180175	0.00139673	4.43714	22.757	1.08337	0.112046	1.24821	0.678557	1.6528	0.0439424	1.08337	0.65548	1832.86	45.2358	277.224	5.87674	525.902	13.4786
WC1_13		bd	12880.6	1558.48	2362.61	38.0953	306752	0.000124189	0.106415	0.000312695	2.51789	22.0994	1.16121	0.119676	1.52385	0.746332	1.91586	0.04525	1.16121	0.606104	1951.39	54.4471	285.293	6.47798	566.094	16.4929
WC1_14		bd	24766.8	2583.55	3503.7	216.407	603169	0.000358783	0.195417	0.00177632	4.95096	23.0215	1.12597	0.102787	1.18845	0.615333	1.63713	0.0434377	1.12597	0.687767	1675.04	43.9247	274.107	6.04047	486.918	12.5863
WC1_01		bd	30691	3669.22	5257.16	36.2904	748108	4.85095e-05	0.190131	0.000212812	4.38702	22.9965	1.29281	0.117272	4.45415	0.702811	4.63797	0.0434848	1.29281	0.278744	1915.06	159.832	274.398	6.94224	540.469	38.1484
WC1_02		bd	24431.3	2537.12	3171.09	30.9524	599956	5.15912e-05	0.144645	0.00018151	3.51823	22.8972	0.949467	0.102087	1.80021	0.61446	2.03525	0.0436734	0.949467	0.466512	1662.41	66.6426	275.562	5.12044	486.369	15.6099
WC1_03		bd	31231.7	3227.02	4067.82	28.5715	779804	3.66393e-05	0.184896	0.000167547	4.57289	23.2708	0.903694	0.103656	2.15998	0.61389	2.3414	0.0429723	0.903694	0.385962	1690.59	79.6748	271.231	4.79871	486.01	17.9272
WC1_04		bd	36166.4	3399.14	3744.55	43.5485	929538	4.68496e-05	0.207852	0.000255374	5.45095	23.8152	0.932235	0.0918201	1.10323	0.531362	1.44436	0.0419901	0.932235	0.645429	1463.67	41.9218	265.157	4.84165	432.713	10.127
WC1_05		bd	29095.7	2509.91	2675.03	5.46875	754407	7.24908e-06	0.164519	3.20696e-05	4.42395	23.965	1.04473	0.0863514	2.57987	0.496589	2.78338	0.0417275	1.04473	0.375346	1346.06	99.6272	263.532	5.39309	409.391	18.5843
WC1_06		bd	22372.4	1874.51	1837.25	3.125	569629	5.48603e-06	0.125182	1.83255e-05	3.34039	23.7637	1.02751	0.0826464	2.4134	0.47931	2.62303	0.042081	1.02751	0.391727	1260.88	94.3245	265.719	5.34735	397.599	17.1141
WC1_07		bd	41831.3	3094.68	2694.18	39.8306	1071742	3.71643e-05	0.228537	0.000233572	6.28485	24.1516	0.953553	0.076269	2.66114	0.43522	2.82682	0.0414052	0.953553	0.337323	1102.14	106.438	261.537	4.88611	366.876	17.2605
WC1_08		bd	28543.9	2540.67	2771.85	18.5484	720400	2.57474e-05	0.162483	0.000108771	4.22453	23.5036	0.915272	0.088521	1.55552	0.519061	1.80481	0.0425467	0.915272	0.507128	1393.82	59.6736	268.599	4.814	424.524	12.4472
WC1_09		bd	44548.2	5108.09	7296.6	225.001	1106108	0.000203417	0.273327	0.00131944	6.48638	23.1726	0.872143	0.115962	1.16036	0.689676	1.45158	0.0431544	0.872143	0.600824	1894.87	41.7386	272.356	4.65003	532.606	11.9614
WC1_10		bd	37605	3658.64	4709.5	343.55	938504	0.000366062	0.220633	0.00201463	5.50352	23.2651	0.896735	0.0982981	1.6343	0.5823	1.86415	0.0429829	0.896735	0.481041	1592.09	61.0525	271.296	4.76288	465.938	13.8368
WC1_11		bd	40297.1	4822.48	7289.55	175.397	991828	0.000176843	0.25152	0.00102856	5.81623	22.9264	1.03224	0.119051	2.18997	0.715658	2.42105	0.0436179	1.03224	0.42636	1942.04	78.3339	275.22	5.55988	548.1	20.3044
WC1_12		bd	41281.3	4318.06	5716.81	127.778	1021645	0.000125071	0.246275	0.000749309	5.99108	23.2712	0.886373	0.103797	1.10063	0.614712	1.41317	0.0429715	0.886373	0.627224	1693.1	40.5859	271.225	4.70668	486.528	10.8669
WC1_01		bd	29006.3	3997.4	6517.05	169.869	745355	0.000227904	0.236166	0.0014174	6.21927	23.0057	1.18086	0.136711	0.795531	0.818981	1.42383	0.0434675	1.18086	0.829352	2185.95	27.6767	274.29	6.33896	607.48	12.9358
WC1_02		bd	26409	3607.62	5727.38	231.375	655913	0.000352753	0.213597	0.0019306	5.47296	22.4418	1.19373	0.135666	1.25172	0.833143	1.72969	0.0445597	1.19373	0.690145	2172.59	43.6118	281.034	6.56211	615.355	15.8401
WC1_03		bd	25083.3	3710.97	6225.81	810.374	615299	0.00131704	0.209271	0.00676178	5.13408	22.2912	1.15684	0.146222	1.01743	0.904034	1.5406	0.0448608	1.15684	0.750901	2302.2	34.956	282.892	6.40048	653.881	14.7469
WC1_04		bd	26793.8	4068.07	7219.22	578.402	632104	0.000915042	0.227562	0.0048262	5.2743	21.3685	1.17952	0.151509	0.841358	0.977167	1.44885	0.0467978	1.17952	0.814111	2363.02	28.7227	294.832	6.79497	692.151	14.4383
WC1_05		bd	24616.2	3335.7	5620.88	260.485	559504	0.000465564	0.200622	0.0021735	4.66852	21.3659	1.18615	0.139168	1.64242	0.897684	2.02595	0.0468035	1.18615	0.585478	2216.88	56.9474	294.867	6.83394	650.489	19.2779
WC1_06		bd	20184.3	2331.53	3463.35	91.1292	486719	0.000187232	0.155245	0.000760385	4.06119	22.4916	1.19796	0.115047	1.08855	0.704952	1.61866	0.0444609	1.19796	0.740096	1880.62	39.2224	280.425	6.57138	541.744	13.5012
WC1_07		bd	20909.2	2611.86	3935.02	109.85	500176	0.000219622	0.164071	0.000916588	4.17348	22.5886	1.20899	0.124268	1.25629	0.758183	1.74354	0.0442701	1.20899	0.693412	2018.39	44.5383	279.247	6.60458	572.961	15.155
WC1_08		bd	24344.6	3091.35	4939.51	341.568	598776	0.000570444	0.193467	0.00285006	4.9962	22.8208	1.21781	0.126666	1.01402	0.76495	1.58471	0.0438196	1.21781	0.768477	2052.2	35.81	276.466	6.58793	576.862	13.853
WC1_01		bd	29258.4	3730.51	5838.6	237.691	728764	0.000326157	0.205359	0.00157346	4.82425	22.6336	1.11571	0.127919	1.23659	0.77891	1.66552	0.0441821	1.11571	0.669886	2069.57	43.5838	278.704	6.08365	584.862	14.7026
WC1_02		bd	23467.3	1838.31	1587.27	207.165	635945	0.000325759	0.142237	0.00137139	4.20982	24.6116	1.17965	0.0771274	1.37079	0.431891	1.80849	0.0406312	1.17965	0.652285	1124.49	54.6466	256.744	5.9356	364.518	11.0175
WC1_03		bd	28247.2	2941.74	3866.83	248.175	730104	0.000339918	0.18541	0.00164287	4.83313	23.5357	1.09398	0.105529	1.16393	0.617948	1.59735	0.0424887	1.09398	0.684873	1723.55	42.7556	268.241	5.74603	488.56	12.3144
WC1_04		bd	28401.8	3144.82	4206.22	213.498	725099	0.000294439	0.189097	0.00141331	4.8	23.1538	1.07929	0.108519	1.33752	0.645937	1.71866	0.0431894	1.07929	0.627979	1774.71	48.8195	272.572	5.75844	505.975	13.6055
WC1_05		bd	32056.9	3298.16	4181.09	612.293	815149	0.000751143	0.209107	0.00405325	5.39611	23.1942	1.19808	0.102741	1.54803	0.610477	1.9575	0.0431143	1.19808	0.612047	1674.21	57.221	272.108	6.38128	483.861	14.958
WC1_06		bd	27338.3	2501.19	3024.84	219.63	685120	0.000320571	0.17382	0.0014539	4.53534	23.0375	1.10992	0.0910101	0.934143	0.544453	1.45071	0.0434075	1.10992	0.76509	1446.81	35.5775	273.919	5.95045	441.356	10.3327
WC1_07		bd	27481.5	2538.64	2968.49	313.851	717043	0.000437702	0.174477	0.00207763	4.74667	24.1287	1.37671	0.0919805	1.80448	0.525372	2.26969	0.0414443	1.37671	0.606565	1466.98	68.5377	261.779	7.05965	428.734	15.7523
WC1_08		bd	28909.4	3189.63	4386.74	164.304	703188	0.000233656	0.192974	0.00108766	4.65494	22.5381	1.13442	0.110268	1.15072	0.674276	1.61588	0.0443693	1.13442	0.702046	1803.83	41.8509	279.859	6.21072	523.309	13.1301
WC1_09		bd	32763.2	3874.41	5976.06	221.1	790258	0.000279782	0.225384	0.00146363	5.23133	22.284	1.08304	0.118065	0.884193	0.730185	1.39813	0.0448751	1.08304	0.774635	1927.14	31.6828	282.981	5.99423	556.662	11.9124
WC1_10	hit white zone	bd	26396.1	2555.29	3160.36	278.821	740360	0.000376602	0.16984	0.00184573	4.90102	25.9078	1.1429	0.0947604	1.7122	0.504083	2.0586	0.0385984	1.1429	0.555181	1523.31	64.5441	244.139	5.47384	414.463	13.915
WC1_11	hit white zone	bd	37455	4148.54	6057.51	569.634	1028973	0.000553595	0.25208	0.00377085	6.81157	25.9094	1.18726	0.110634	1.07351	0.588488	1.60063	0.038596	1.18726	0.741748	1809.85	39.0138	244.124	5.68589	469.901	11.9713
WC1_12		361.806	32794.7	4304.68	6853.41	655.439	786775	0.000833071	0.232467	0.00433886	5.20828	23.0208	1.14352	0.130689	1.12869	0.782392	1.60673	0.043439	1.14352	0.711706	2107.24	39.612	274.114	6.13476	586.847	14.2226
WC1_13		bd	31450.3	4276.07	6941.75	428.823	736471	0.000582267	0.225672	0.00283871	4.87527	22.3819	1.13838	0.136784	1.09671	0.84226	1.58072	0.0446791	1.13838	0.720164	2186.88	38.1509	281.771	6.27399	620.392	14.571
WC1_14		bd	35015.6	4065.3	5920.06	85.7249	840357	0.00010201	0.238011	0.00056748	5.56298	22.6317	1.08016	0.114709	0.733412	0.698529	1.30562	0.0441857	1.08016	0.827318	1875.31	26.443	278.726	5.89039	537.912	10.8459
WC1_15		bd	27512.6	3062.36	4226.23	46.5615	666080	6.99037e-05	0.184064	0.000308227	4.4093	22.9616	1.07321	0.111125	0.835535	0.666984	1.36011	0.0435509	1.07321	0.789061	1817.9	30.3355	274.806	5.77194	518.877	10.9917
WC1_01		bd	22472.8	2906.48	4555.96	163.115	551530	0.000295751	0.158328	0.00122401	4.13866	22.1396	1.13903	0.128336	0.977872	0.798884	1.5012	0.045168	1.13903	0.758742	2075.3	34.4429	284.787	6.34327	596.199	13.4493
WC1_02		bd	31578.6	4171.8	6662.17	300.002	801415	0.00037434	0.224321	0.0022512	6.01379	22.8579	1.07086	0.130731	0.746599	0.788221	1.30543	0.0437485	1.07086	0.820312	2107.81	26.2006	276.026	5.78435	590.162	11.6186
WC1_03		bd	31616.1	4172.36	6516.31	191.526	796744	0.000240386	0.22375	0.00143721	5.97874	22.6666	1.09726	0.131362	0.873425	0.798712	1.40244	0.0441178	1.09726	0.78239	2116.26	30.6223	278.307	5.97475	596.102	12.5685
WC1_04		bd	33100.8	4032.5	5879.66	162.699	823425	0.000197588	0.227496	0.00122089	6.17896	22.6006	1.08934	0.121478	0.957383	0.740769	1.45026	0.0442465	1.08934	0.751137	1978.05	34.1006	279.101	5.94825	562.854	12.4561
WC1_05		bd	33201.2	4225.97	6493.5	239.345	821271	0.000291433	0.232297	0.00179604	6.1628	22.4494	1.13419	0.12607	0.70736	0.773951	1.33669	0.0445447	1.13419	0.848505	2043.88	25.0042	280.942	6.23293	582.027	11.7745
WC1_06		301.849	34265.7	4387.51	6860.68	181.667	832960	0.000218098	0.240724	0.00136323	6.25051	22.8332	1.06274	0.126471	0.735885	0.763365	1.29265	0.043796	1.06274	0.82214	2049.49	25.9958	276.319	5.74644	575.95	11.3008
WC1_07		bd	29067.1	3784.29	6022.74	200.001	705757	0.000283385	0.205606	0.0015008	5.29598	22.9199	1.0807	0.129571	0.7649	0.779113	1.324	0.0436301	1.0807	0.816235	2092.15	26.8902	275.295	5.82231	584.977	11.7068
WC1_08		bd	32032	4155.02	6547.14	675.009	759768	0.00088844	0.226022	0.00506525	5.70128	22.4379	1.09799	0.124187	2.74834	0.762784	2.95955	0.0445675	1.09799	0.371	2017.24	97.4477	281.083	6.03708	575.615	25.6794
WC1_09		bd	25426.3	3187.18	4808.89	173.388	621358	0.000279047	0.176771	0.0013011	4.66265	22.8775	1.05227	0.122817	1.08283	0.739873	1.5099	0.0437111	1.05227	0.696912	1997.55	38.4815	275.795	5.67928	562.331	12.9561
WC1_10		bd	22927.3	2419.7	3325.62	98.276	553177	0.000177658	0.15165	0.000737461	4.15102	22.6883	1.14754	0.109265	2.33928	0.663721	2.60559	0.0440757	1.14754	0.440417	1787.19	85.2523	278.046	6.24272	516.887	20.8927
WC1_11		bd	17465.4	1925.77	2735.4	81.1477	415739	0.000195189	0.117028	0.00060893	3.1197	23.1216	1.14741	0.110156	1.17815	0.656594	1.64457	0.0432495	1.14741	0.6977	1801.99	42.8582	272.944	6.12992	512.528	13.1515
WC1_12		bd	22907.9	2820.25	4142.12	264.168	535420	0.000493384	0.157984	0.00198231	4.01778	22.5471	1.10927	0.121719	1.13403	0.743998	1.58635	0.0443515	1.10927	0.699259	1981.57	40.376	279.749	6.07077	564.736	13.651
WC1_13		bd	20518.2	2631.6	4088.01	213.935	464075	0.000460993	0.144061	0.00160536	3.4824	21.8572	1.14248	0.125632	1.25008	0.792155	1.69351	0.0457515	1.14248	0.674626	2037.71	44.2197	288.385	6.44107	592.393	15.0886
WC1_14		bd	28712.5	3883.32	6253.94	149.194	673717	0.000221449	0.205477	0.00111955	5.05555	22.6974	1.11297	0.135408	0.839822	0.822192	1.39428	0.0440579	1.11297	0.798243	2169.27	29.2713	277.937	6.05239	609.27	12.6961
WC1_15		bd	32227.3	4399.28	7165.25	213.116	752676	0.000283144	0.231615	0.00159921	5.64806	22.5461	1.07721	0.135754	0.777927	0.829828	1.32874	0.0443535	1.07721	0.810701	2173.73	27.1007	279.762	5.89566	613.517	12.164
WC1_16		bd	25789.8	3277.62	5072.49	97.5002	609893	0.000159865	0.180566	0.000731639	4.57662	22.7035	1.08788	0.125743	0.87018	0.763306	1.39309	0.0440462	1.08788	0.780913	2039.29	30.7758	277.864	5.91451	575.915	12.1732
WC1_17		bd	25279.5	3304.12	5182.57	63.1148	593962	0.000106261	0.17859	0.000473612	4.45707	22.647	1.08308	0.128517	0.944295	0.782085	1.43693	0.0441559	1.08308	0.753748	2077.78	33.2509	278.542	5.90246	586.672	12.7261
WC1_18		bd	26334.4	2958.46	4176.52	60.0001	639630	9.38044e-05	0.17702	0.000450239	4.79977	23.4011	1.11958	0.111905	0.923638	0.659048	1.4514	0.042733	1.11958	0.771379	1830.58	33.4824	269.751	5.91284	514.031	11.6416
WC1_19		bd	31271.7	3750.82	5752.23	173.334	707448	0.000245013	0.215658	0.00130069	5.30867	21.9197	1.3293	0.11954	1.22434	0.751597	1.80722	0.045621	1.3293	0.735549	1949.36	43.756	287.581	7.47324	569.151	15.627
WC1_01		bd	23298	2002.22	1738.69	42.2725	545899	7.74365e-05	0.192119	0.000403548	5.21134	23.974	1.01748	0.0847588	2.21542	0.487248	2.4379	0.0417118	1.01748	0.417357	1310.03	85.9862	263.435	5.25058	403.034	16.0915
WC1_02		bd	24109.5	2466.65	3161.1	16.7719	552034	3.0382e-05	0.211291	0.00016011	5.26991	23.42	1.03871	0.101681	1.31592	0.598353	1.67647	0.0426986	1.03871	0.619582	1655.02	48.7605	269.539	5.48169	476.188	12.6657
WC1_03		bd	27915	3586.1	5472.29	74.9405	613569	0.000122139	0.262706	0.000715408	5.85734	22.6429	0.996664	0.128046	0.826784	0.779366	1.29496	0.044164	0.996664	0.769651	2071.32	29.1344	278.592	5.43267	585.122	11.4535
WC1_04		bd	18173.5	2452.12	3965.4	53.5628	384123	0.000139442	0.174726	0.00051133	3.66697	21.686	1.16538	0.133667	1.66252	0.849477	2.03029	0.0461127	1.16538	0.573995	2146.7	58.0906	290.611	6.61962	624.362	18.763
WC1_05		bd	27399.4	3195.25	4561.23	90.6598	624299	0.000145218	0.249793	0.000865469	5.95978	23.4162	0.993411	0.115556	0.898387	0.680113	1.33939	0.0427054	0.993411	0.741689	1888.57	32.3397	269.581	5.24351	526.843	10.9513
WC-1_06		bd	16589	1739.83	2427.22	-0.469484	375236	-1.25117e-06	0.147478	-4.48186e-06	3.58213	23.3073	1.24305	0.110352	2.80329	0.652523	3.06654	0.042905	1.24305	0.40536	1805.22	101.937	270.815	6.5899	510.03	24.2968
WC-1_07		bd	21541.6	2278.21	2946.52	30.4829	482050	6.32361e-05	0.190182	0.000291001	4.60181	23.049	1.01443	0.104086	0.995078	0.62237	1.421	0.0433859	1.01443	0.713882	1698.23	36.6698	273.786	5.43613	491.332	11.0102
WC-1_08		bd	25976.1	2349.96	2775.81	29.0387	592936	4.89745e-05	0.220988	0.000277214	5.66037	23.5365	1.02051	0.0900318	1.40806	0.527181	1.73899	0.0424872	1.02051	0.586842	1426.2	53.7776	268.231	5.36009	429.937	12.118
WC-1_09		bd	22130.7	1772.76	1731.02	88.8749	513592	0.000173046	0.18214	0.000848431	4.90293	24.0754	1.0207	0.0799505	1.72684	0.457672	2.00594	0.0415362	1.0207	0.508838	1195.77	68.1262	262.348	5.24593	382.638	12.7102
WC-1_10		bd	17689	1610.64	1862.49	10.0144	411401	2.43421e-05	0.150363	9.56008e-05	3.92738	23.5777	1.2637	0.0912273	1.29476	0.533249	1.80924	0.042413	1.2637	0.698471	1451.35	49.2815	267.772	6.62563	433.963	12.6985
WC-1_11		bd	24608.8	2484.02	3210.28	58.547	569884	0.000102735	0.215313	0.00055891	5.44031	23.5464	1.02707	0.101551	1.08792	0.594382	1.49614	0.0424694	1.02707	0.686478	1652.66	40.3244	268.121	5.39235	473.662	11.264
WC-1_12		bd	25963.4	1846.52	1333.49	128.219	605051	0.000211915	0.207072	0.00122403	5.77603	24.1023	0.987435	0.0718831	1.11036	0.41103	1.48591	0.0414898	0.987435	0.664533	982.634	45.2189	262.061	5.06958	349.617	8.75218
WC-1_13		bd	25121	1981.57	1805.35	85.245	585476	0.0001456	0.205399	0.000813778	5.58915	23.9458	0.977041	0.0784395	1.77165	0.451452	2.0232	0.041761	0.977041	0.482918	1158.03	70.2794	263.74	5.04771	378.296	12.6996
WC-1_14		bd	23638.7	1632.84	1172.2	106.789	551476	0.000193642	0.18789	0.00101944	5.26458	24.1207	0.980801	0.0688403	1.13358	0.393332	1.49899	0.0414582	0.980801	0.654308	893.958	46.8024	261.865	5.03185	336.8	8.5572
WC-1_15		bd	20912.8	2844.56	4748.01	156.674	449382	0.000348643	0.202539	0.00149566	4.28996	21.7902	1.17844	0.138898	1.2526	0.878498	1.7198	0.0458921	1.17844	0.68522	2213.52	43.4471	289.252	6.66321	640.171	16.2031
DuffBrown_01		1394.11	80187.1	26354.9	62993.1	4617.96	5003162	0.000923008	0.50047	0.0193785	20.9949	58.9117	1.32383	0.319599	1.08459	0.74767	1.71139	0.0169746	1.32383	0.77354	3567.91	33.3655	108.507	2.84821	566.871	14.7604
DuffBrown_02		1264.87	75087.6	24447.2	59273.6	4147.23	4420369	0.000938209	0.468805	0.0174031	18.5493	57.4994	1.19546	0.325725	0.739832	0.780717	1.40587	0.0173915	1.19546	0.850333	3597.08	22.7131	111.149	2.63416	585.893	12.4406
DuffBrown_03		1309.01	77931.4	25250.9	59655.1	3930.57	4886406	0.000804389	0.480698	0.016494	20.5049	60.9758	1.23819	0.317488	0.86927	0.717589	1.51286	0.0164	1.23819	0.818444	3557.71	26.761	104.863	2.5753	549.243	12.7551
DuffBrown_04		1391.28	73900.4	22368.5	53104	3985.69	4889889	0.000815088	0.440951	0.0167252	20.5196	63.4517	1.18994	0.300588	0.761632	0.652881	1.41281	0.01576	1.18994	0.842249	3473.26	23.5899	100.803	2.3799	510.25	11.27
DuffBrown_05		1586.72	77320.5	26888.2	64824.9	3551.99	4407090	0.000805972	0.49899	0.0149053	18.4936	54.4027	1.24577	0.342865	0.682223	0.868579	1.42034	0.0183815	1.24577	0.877092	3675.59	20.8313	117.419	2.8984	634.795	13.3199
DuffBrown_06		1256.36	73311.1	22343.8	52347.9	2719.87	4696809	0.000579089	0.436906	0.0114134	19.7093	62.1734	1.26581	0.298727	0.80156	0.662181	1.49826	0.016084	1.26581	0.844855	3463.64	24.8441	102.859	2.58283	515.947	12.0494
DuffBrown_07		1350.8	77657.6	23159.6	54002.3	3232.64	5092115	0.000634833	0.457029	0.0135652	21.3682	62.1174	1.21985	0.294701	0.665963	0.653845	1.3898	0.0160985	1.21985	0.877717	3442.59	20.6731	102.951	2.49128	510.842	11.0973
DuffBrown_08		989.35	67019.6	17979.9	41990.5	2850.35	4648731	0.000613145	0.374876	0.011961	19.5076	66.787	1.14345	0.266519	0.631387	0.549974	1.30619	0.014973	1.14345	0.875409	3285.66	19.8334	95.8065	2.17443	444.979	9.36866
DuffBrown_09		1340.8	76096.8	22888.3	54080.1	4528.76	4892642	0.000925627	0.451851	0.0190042	20.5311	61.9886	1.17117	0.300593	0.657175	0.668302	1.34295	0.016132	1.17117	0.872086	3473.28	20.3546	103.164	2.39676	519.679	10.8665
DuffBrown_10		1241.13	69009.9	21761.5	51556.3	3313.65	4313443	0.000768214	0.420153	0.0139051	18.1006	60.7699	1.27904	0.311809	0.96948	0.707142	1.60494	0.0164555	1.27904	0.79694	3529.9	29.9051	105.216	2.66911	543.048	13.4117
DuffBrown_11		1303.89	75778.9	22780.1	53657.8	3308.96	4906141	0.000674453	0.449346	0.0138855	20.5878	62.4498	1.21492	0.296111	0.696669	0.653474	1.40049	0.0160129	1.21492	0.867495	3450	21.6146	102.408	2.46821	510.615	11.1784
DuffBrown_12		1225.96	73396.2	22833.6	54145.7	2563.01	4550328	0.000563259	0.443911	0.0107552	19.0946	60.3445	1.29411	0.309733	0.925738	0.707386	1.59114	0.0165715	1.29411	0.813326	3519.59	28.5769	105.951	2.71928	543.193	13.2998
DuffBrown_01		2013.01	92770.4	33656.9	83214.1	3738.26	4799122	0.000778947	0.623879	0.0154086	19.7814	50.2666	1.05619	0.363762	0.453236	0.99734	1.14933	0.0198939	1.05619	0.918961	3765.64	13.756	126.985	2.65562	702.459	11.5882
DuffBrown_02		1396.33	90427.8	27068.6	63464.2	2983.59	5782669	0.000515954	0.538527	0.012298	23.8354	61.6454	0.956179	0.29543	0.558563	0.66048	1.10737	0.0162218	0.956179	0.863467	3446.42	17.3343	103.733	1.96758	514.908	8.9058
DuffBrown_03		1527.24	85623.9	26026.9	60996.8	2770.42	5423908	0.00051078	0.513788	0.0114193	22.3566	60.8219	1.17383	0.298759	0.922301	0.676967	1.49282	0.0164415	1.17383	0.786317	3463.8	28.586	105.127	2.44754	524.939	12.1649
DuffBrown_04		1318.09	85394	24077.7	55914.2	2455.07	5715518	0.000429545	0.492177	0.0101195	23.5586	64.2773	1.02807	0.284284	0.630884	0.609537	1.20621	0.0155576	1.02807	0.852314	3386.62	19.6658	99.5185	2.0302	483.268	9.23433
DuffBrown_05		1331.77	83913.6	23153.1	54381.1	2654.99	5680538	0.000467383	0.480458	0.0109435	23.4144	65.3278	1.0449	0.274991	0.818224	0.580131	1.32714	0.0153074	1.0449	0.787331	3334.72	25.6057	97.9303	2.03076	464.546	9.84698
DuffBrown_06		2016.35	87256.6	35675.3	88968.3	2003.35	4218028	0.00047495	0.630601	0.00825756	17.3862	45.3587	1.59612	0.408134	1.08903	1.24008	1.93225	0.0220465	1.59612	0.826043	3939.32	32.686	140.577	4.43744	818.916	21.4934
DuffBrown_07		1135.72	68674.1	19629.3	46223	1936.09	4605182	0.000420415	0.400342	0.0079803	18.982	64.7584	1.11744	0.28086	1.00833	0.597723	1.50513	0.015442	1.11744	0.742422	3367.72	31.4763	98.7848	2.19053	475.788	11.371
DuffBrown_08		1425.64	69664.1	24413.3	59215.4	1717.93	4040804	0.000425146	0.45619	0.00708109	16.6557	53.5714	2.51054	0.348676	2.28858	0.897005	3.39712	0.0186667	2.51054	0.739021	3701.22	69.7593	119.224	5.92859	650.126	32.108
DuffBrown_01		1057.76	71640.1	19937.9	46237.1	2250.08	5024226	0.000447846	0.384694	0.00887552	19.8182	65.8848	1.25969	0.277406	0.651427	0.580278	1.41816	0.015178	1.25969	0.888257	3348.39	20.3648	97.1087	2.42775	464.64	10.5205
DuffBrown_02		1001.2	75702	20112.3	46217.3	2158.01	5347714	0.000403539	0.396464	0.00851235	21.0943	65.4492	1.24628	0.265291	0.692714	0.55863	1.42586	0.015279	1.24628	0.874057	3278.41	21.7721	97.75	2.41764	450.635	10.3254
DuffBrown_03		977.882	64886.6	17783.1	41011.2	2082.1	4458344	0.000467012	0.345241	0.00821292	17.5861	64.5333	1.30452	0.271903	0.744437	0.580679	1.50198	0.0154959	1.30452	0.86853	3317.04	23.3282	99.1267	2.56596	464.898	11.1438
DuffBrown_04		1398.3	69574.8	22177.2	53961.4	2990.87	4149143	0.00072084	0.406741	0.0117976	16.3665	55.1863	1.54509	0.316192	0.70401	0.789635	1.69792	0.0181205	1.54509	0.90999	3551.41	21.683	115.766	3.54448	590.965	15.101
DuffBrown_05		935.499	63203	16968.3	39145.9	2298.49	4489854	0.000511931	0.33306	0.0090665	17.7104	66.5351	1.27091	0.271197	0.646823	0.561746	1.42604	0.0150297	1.27091	0.891215	3312.96	20.2756	96.1665	2.42577	452.662	10.3634
DuffBrown_06		1075.1	71260.4	21135.2	50567.4	2970.77	4895179	0.000606877	0.399064	0.0117183	19.3092	63.1165	1.25413	0.295315	0.603753	0.644836	1.39189	0.0158437	1.25413	0.901026	3445.82	18.7375	101.335	2.52136	505.296	11.0213
DuffBrown_07		659.706	43418.8	12290.4	28682	1966.47	3159693	0.00062236	0.235568	0.0077568	12.4635	67.3692	1.29945	0.283426	0.823867	0.579808	1.53861	0.0148436	1.29945	0.84456	3381.9	25.6905	94.9847	2.45	464.338	11.4032
DuffBrown_08		1235.83	64309.3	21029.3	50614.2	2154.04	4023429	0.000535374	0.379496	0.0084967	15.8706	58.6894	1.75902	0.3383	1.15605	0.794415	2.1049	0.0170388	1.75902	0.835677	3655.11	35.349	108.914	3.79833	593.673	18.7499
DuffBrown_09		640.948	48011.4	12649.1	29364.1	2196.9	3607463	0.000608987	0.251293	0.00866575	14.2298	69.8346	1.26076	0.264984	0.720509	0.522943	1.45212	0.0143195	1.26076	0.868221	3276.58	22.6489	91.655	2.29434	427.115	10.0757
DuffBrown_10		651.86	46586.9	12832.2	30606.1	1814.11	3374668	0.000537568	0.251294	0.00715584	13.3115	67.4344	1.50291	0.276655	1.17873	0.565409	1.91001	0.0148292	1.50291	0.78686	3344.15	36.8609	94.8934	2.83081	455.041	13.914
DuffBrown_01		1035.48	81574.7	20900.9	48043.2	3183.68	5627144	0.000565772	0.384111	0.0127169	22.4771	68.8685	1.06932	0.255075	0.615774	0.51045	1.23394	0.0145204	1.06932	0.866585	3216.54	19.448	92.9316	1.97291	418.752	8.4333
DuffBrown_02		1250.25	74551.1	23647.4	55821.2	3083.42	4450646	0.000692803	0.393045	0.0123164	17.7777	59.9569	1.21816	0.30884	1.07722	0.709905	1.62614	0.0166787	1.21816	0.749112	3515.13	33.2638	106.631	2.57598	544.69	13.6185
DuffBrown_03		1469.23	73563.2	24035.8	57650.9	3009.42	4295515	0.000700596	0.396184	0.0120208	17.158	59.1644	1.12822	0.321735	0.625309	0.749452	1.28992	0.0169021	1.12822	0.874644	3578.15	19.2228	108.047	2.41725	567.906	11.1603
DuffBrown_04		1639.66	89245	27202.9	64455.5	3908.9	5443822	0.000718043	0.46165	0.0156137	21.7448	61.4977	1.11426	0.300127	0.755351	0.672592	1.34615	0.0162608	1.11426	0.827736	3470.88	23.3995	103.981	2.29823	522.287	10.9339
DuffBrown_05		1270.49	71377	19018.5	44047.3	2793.4	4776597	0.000584809	0.343087	0.011158	19.0797	66.6421	1.06733	0.266667	0.693884	0.551476	1.27306	0.0150055	1.06733	0.838402	3286.53	21.7951	96.0133	2.03406	445.963	9.14812
DuffBrown_06		1190.88	66902.3	20401.6	48391.9	2332.35	4267635	0.000546521	0.346284	0.00931637	17.0467	63.7379	1.2101	0.301574	1.05223	0.652081	1.60359	0.0156893	1.2101	0.754616	3478.32	32.5784	100.354	2.40951	509.759	12.7729
DuffBrown_07		1270.54	85109.4	24025.3	55936	3514.77	5589845	0.000628778	0.421246	0.0140394	22.3281	66.6422	1.17996	0.276869	0.683092	0.572573	1.36343	0.0150055	1.17996	0.865441	3345.36	21.3596	96.0131	2.24866	459.677	10.0315
DuffBrown_08		1425.42	84633.2	23856.2	55356.1	3290.78	5535834	0.00059445	0.418119	0.0131447	22.1124	65.5636	1.05125	0.278724	0.699794	0.585892	1.26287	0.0152524	1.05125	0.83243	3355.8	21.8645	97.5808	2.03587	468.241	9.4307
DuffBrown_09		1302.24	74269.2	21923.6	51389.9	3046.49	4789625	0.000636059	0.376618	0.0121689	19.1317	63.9544	1.05613	0.293677	0.611613	0.632857	1.22044	0.0156361	1.05613	0.865366	3437.19	18.9935	100.017	2.09597	497.874	9.56066
DuffBrown_10		995.85	72775.9	19785.5	45741.2	3513.24	4885337	0.000719141	0.352936	0.0140333	19.514	67.2169	1.05038	0.270843	0.693404	0.555322	1.25862	0.0148772	1.05038	0.834554	3310.91	21.7392	95.1983	1.9849	448.477	9.08519
DuffBrown_11		1176.36	78190.1	21580	49577	3495.71	5272565	0.000662999	0.381121	0.0139633	21.0608	66.6307	1.20229	0.274794	0.803179	0.568381	1.44589	0.0150081	1.20229	0.831522	3333.6	25.1371	96.0296	2.29159	456.967	10.5856
DuffBrown_12		1089.01	79048.1	22282.5	51722.6	4053.47	5378314	0.000753669	0.390578	0.0161912	21.4832	67.6675	1.13765	0.280117	0.666555	0.570512	1.31854	0.0147781	1.13765	0.862812	3363.58	20.8137	94.569	2.13568	458.345	9.68067
DuffBrown_01		1370.83	76233.2	24080.8	57283.5	2841	4798523	0.000592056	0.343255	0.00937141	15.8286	60.2588	1.26047	0.317044	0.983545	0.725112	1.5988	0.0165951	1.26047	0.788389	3555.56	30.2836	106.101	2.65231	553.68	13.5562
DuffBrown_02		1310.77	78109.2	23689.5	55939	2695.82	5192566	0.00051917	0.343561	0.00889254	17.1284	63.3807	1.19529	0.296017	0.827129	0.643675	1.45356	0.0157777	1.19529	0.822313	3449.51	25.6631	100.915	2.39323	504.579	11.4943
DuffBrown_03		1444.68	68467.1	24389	60077	1860.68	3950737	0.000470972	0.333096	0.00613772	13.032	54.7423	1.48645	0.35368	1.00267	0.890415	1.79301	0.0182674	1.48645	0.829026	3722.92	30.5182	116.697	3.43715	646.592	17.0073
DuffBrown_04		4139.68	133189	66996.9	170990	2341.07	4418384	0.000529848	0.808441	0.00772235	14.5746	31.0805	2.34842	0.497312	1.13084	2.2052	2.60651	0.0321746	2.34842	0.900984	4233.26	33.3529	204.144	9.43119	1182.69	35.7798
DuffBrown_05		1261.91	83720.9	22563.2	51743	3646.79	5907920	0.000617271	0.344191	0.0120294	19.4881	67.3129	1.25462	0.266439	0.71074	0.545513	1.44195	0.014856	1.25462	0.870086	3285.19	22.3269	95.0635	2.36744	442.053	10.2835
DuffBrown_06		1360.91	73901.4	22370	52839.6	3073.68	4758614	0.000645919	0.324771	0.0101389	15.6969	61.969	1.18552	0.302488	0.764671	0.672728	1.41073	0.0161371	1.18552	0.840354	3483.01	23.6673	103.196	2.42687	522.37	11.4569
DuffBrown_07		1152.79	84057.9	21059.5	47995.7	3283.3	6117249	0.000536728	0.333488	0.0108304	20.1786	69.7919	1.16835	0.248863	0.701349	0.49143	1.36269	0.0143283	1.16835	0.857382	3177.55	22.2197	91.7107	2.12747	405.884	9.07763
DuffBrown_08		951.989	69587.6	18855.4	43065.2	2856.32	4917863	0.000580806	0.286431	0.00942197	16.2222	66.869	1.16681	0.269454	0.718855	0.555349	1.37048	0.0149546	1.16681	0.851392	3302.85	22.5511	95.6899	2.21617	448.494	9.88901
DuffBrown_10		1267.15	84232.9	22525.6	52050.5	3990.56	5840701	0.000683233	0.345894	0.0131634	19.2663	66.2878	1.23726	0.265157	0.728957	0.551285	1.43603	0.0150857	1.23726	0.861582	3277.61	22.9126	96.5227	2.37024	445.838	10.311
DuffBrown_11		1227.57	83156.5	22176.1	50832.2	3650.68	5767394	0.000632987	0.340135	0.0120423	19.0245	66.0637	1.18073	0.264566	0.660425	0.551921	1.35288	0.0151369	1.18073	0.872754	3274.1	20.7642	96.8476	2.26953	446.254	9.72404
DuffBrown_12		1061.65	59191.8	18302.8	42998.8	2034.26	3878599	0.000524483	0.262441	0.00671028	12.7941	62.3362	1.1682	0.304743	0.858613	0.67375	1.4498	0.016042	1.1682	0.80577	3494.5	26.5527	102.593	2.37758	522.99	11.7829
DuffBrown_01		1304.04	91297.4	23348.1	52835.3	2758.03	7252097	0.000380308	0.566514	0.0124007	32.607	72.8898	1.32199	0.253127	0.655429	0.478605	1.47555	0.0137193	1.32199	0.895932	3204.43	20.7204	87.8393	2.3063	397.116	9.65325
DuffBrown_02		969.297	63288.9	19119.1	44942.4	1944.21	4232459	0.000459358	0.43077	0.00874161	19.0301	61.9168	1.10518	0.300219	0.696164	0.668245	1.30616	0.0161507	1.10518	0.846125	3471.36	21.5652	103.282	2.26432	519.645	10.5699
DuffBrown_03		1197.37	79785.2	20924.2	48329	2476.28	5731668	0.000432035	0.504131	0.0111339	25.7708	67.8814	1.10943	0.260228	0.675969	0.528336	1.29914	0.0147316	1.10943	0.853972	3248.09	21.2961	94.2732	2.07624	430.705	9.07956
DuffBrown_04		839.6	78549.3	18506.2	41732.6	2412.77	6063466	0.000397919	0.469459	0.0108483	27.2627	71.4886	1.0527	0.235046	0.533807	0.453129	1.1803	0.0139882	1.0527	0.891885	3086.73	17.0373	89.5491	1.87205	379.468	7.44694
DuffBrown_05		1090.53	82346.1	20894.7	47202.8	2762.79	6128394	0.000450819	0.508884	0.0124221	27.5546	69.2975	1.13008	0.25125	0.767042	0.499683	1.36581	0.0144305	1.13008	0.827407	3192.66	24.2716	92.3604	2.07228	411.488	9.19976
DuffBrown_06		1181.01	74033.6	19740.3	45195.2	2777.55	5345211	0.000519632	0.470071	0.0124885	24.0332	67.208	1.13924	0.264832	0.840446	0.543069	1.41571	0.0148792	1.13924	0.804717	3275.68	26.421	95.2108	2.15306	440.446	10.0681
DuffBrown_07		1073.65	65644.4	16910.5	38175.7	2236.42	4909294	0.000455548	0.408378	0.0100554	22.0733	69.6324	1.07924	0.255163	0.545667	0.505024	1.20934	0.0143611	1.07924	0.892417	3217.08	17.2331	91.9193	1.96967	415.097	8.20767
DuffBrown_08		946.118	63414.1	16345.5	37736.5	2238.76	4685278	0.000477829	0.397437	0.010066	21.066	68.7533	1.08736	0.255751	0.67772	0.51266	1.28127	0.0145448	1.08736	0.848658	3220.72	21.3974	93.0862	2.00951	420.236	8.78032
DuffBrown_09		854.716	65874.4	16918.7	38845	2400.49	5020047	0.000478182	0.411448	0.0107931	22.5712	70.0843	1.07724	0.254716	0.753452	0.500888	1.31459	0.0142685	1.07724	0.819453	3214.32	23.8005	91.3308	1.95354	412.303	8.87041
DuffBrown_10		969.408	67617	17359.5	39212.6	3062.72	4950336	0.00061869	0.420077	0.0137707	22.2578	68.5613	1.08212	0.25617	0.554234	0.51494	1.21579	0.0145855	1.08212	0.89005	3223.31	17.495	93.3451	2.00534	421.765	8.3578
DuffBrown_11		1223.48	74662.2	19392	44183.2	3106.15	5482962	0.000566509	0.467596	0.0139659	24.6526	68.599	1.0743	0.257059	0.648751	0.516442	1.25499	0.0145775	1.0743	0.856023	3228.77	20.4697	93.2941	1.98977	422.772	8.64263
DuffBrown_12		1122.56	71652.4	18636.9	42595.1	3316.69	5240064	0.000632949	0.449489	0.0149126	23.5605	68.3363	1.06014	0.258511	0.644485	0.521356	1.24067	0.0146335	1.06014	0.854491	3237.66	20.3209	93.6502	1.97099	426.057	8.59764
DuffBrown_01		2002.76	95282.2	31038.5	74554.1	4074.28	6012554	0.000677629	0.659106	0.0162997	24.054	56.8698	1.29324	0.325561	0.678966	0.788964	1.46064	0.017584	1.29324	0.885393	3596.31	20.8457	112.369	2.88057	590.584	12.998
DuffBrown_02		1743.12	96788.5	32152.2	77665.6	3896.72	6026166	0.000646634	0.677912	0.0155893	24.1085	56.5638	1.34631	0.330779	0.738568	0.805944	1.53559	0.0176792	1.34631	0.876738	3620.69	22.6371	112.972	3.01468	600.176	13.8221
DuffBrown_03		1667.84	82695.4	28545.3	69721.4	3421.44	5114331	0.000668991	0.593769	0.0136879	20.4605	54.9664	1.33337	0.345628	0.717718	0.866596	1.51426	0.0181929	1.33337	0.88054	3687.83	21.8969	116.225	3.07091	633.717	14.1772
DuffBrown_04		1697.48	86760.6	29270.7	71053.1	3906.41	5368601	0.000727641	0.613857	0.0156281	21.4778	56.2178	1.39163	0.335919	0.77698	0.823506	1.59384	0.017788	1.39163	0.873129	3644.3	23.7756	113.661	3.13498	610.002	14.513
DuffBrown_05		1435.44	87890.6	26849.9	63447.6	4986.87	6090705	0.000818768	0.584667	0.0199506	24.3667	62.135	1.37787	0.299658	0.820376	0.664654	1.60361	0.016094	1.37787	0.859234	3468.46	25.4183	102.922	2.81315	517.457	12.92
DuffBrown_06		1545.23	76079	27402.7	68164.6	3504.11	4495609	0.000779453	0.563202	0.0140187	17.9853	52.9406	1.31971	0.358773	0.794468	0.933977	1.54039	0.0188891	1.31971	0.856735	3744.66	24.1461	120.631	3.15359	669.725	14.9957
DuffBrown_07		1437.87	88847.5	26519.5	61967.5	5132.89	6349275	0.000808422	0.581866	0.0205348	25.4011	63.7179	1.2937	0.29906	0.734125	0.646848	1.48748	0.0156942	1.2937	0.869725	3465.36	22.7511	100.385	2.57674	506.537	11.796
DuffBrown_08		1420.23	77459.6	22966.2	53927.1	4128.31	5649393	0.000730753	0.506459	0.0165158	22.6011	65.496	1.3142	0.291004	0.790343	0.612336	1.53355	0.0152681	1.3142	0.856969	3422.98	24.5698	97.6807	2.54759	485.032	11.7591
DuffBrown_09		1131.45	82507.6	22582	52489.6	4356.46	6083830	0.000716072	0.517045	0.0174286	24.3392	66.5669	1.23642	0.269512	0.672869	0.557989	1.40765	0.0150225	1.23642	0.878356	3303.19	21.1079	96.1209	2.35885	450.217	10.1868
DuffBrown_10		1065.43	71252.9	18530.3	41714.7	5200.24	5490136	0.000947197	0.431468	0.0208042	21.964	68.6493	1.24672	0.257249	0.643807	0.516445	1.40313	0.0145668	1.24672	0.888522	3229.94	20.3119	93.2262	2.30739	422.774	9.65805
DuffBrown_11		1226.13	77574.2	20625.6	47201	3654.06	5914473	0.000617817	0.477086	0.0146186	23.6616	67.5004	1.24277	0.264802	0.614241	0.540656	1.38628	0.0148147	1.24277	0.896479	3275.51	19.3101	94.8014	2.33866	438.857	9.83155
DuffBrown_12		1184.31	73297.2	21357.4	49930.1	4373.51	5279090	0.000828459	0.474408	0.0174968	21.1197	64.3511	1.38879	0.290706	0.844362	0.622593	1.62533	0.0155397	1.38879	0.854469	3421.39	26.2522	99.4053	2.7393	491.471	12.5864
DuffBrown_13		1142.56	82368.8	21321.3	48588.7	4321.42	6284161	0.000687669	0.499654	0.0172884	25.1406	68.56	1.27271	0.257129	0.691874	0.516875	1.44861	0.0145858	1.27271	0.878571	3229.2	21.8297	93.3468	2.35852	423.062	9.975
DuffBrown_14		1028.5	74213.7	18595	42712.3	3952.53	5853667	0.000675222	0.444668	0.0158126	23.4184	70.2895	1.26158	0.249529	0.668804	0.489257	1.42789	0.0142269	1.26158	0.883524	3181.78	21.1815	91.0661	2.28118	404.404	9.48187
DuffBrown_15		1213.48	80770.7	20423.6	45971.6	3464.17	6330054	0.000547258	0.482877	0.0138589	25.3242	69.6463	1.25652	0.250527	0.61167	0.495749	1.39749	0.0143583	1.25652	0.899125	3188.1	19.3622	91.9012	2.29272	408.821	9.36285
DuffBrown_16		1132.55	82299.2	21346.7	48895.8	3860.54	6486001	0.000595211	0.500516	0.0154446	25.9481	70.2249	1.28266	0.256859	0.772446	0.504091	1.49729	0.01424	1.28266	0.856652	3227.54	24.375	91.1492	2.3214	414.468	10.1398
DuffBrown_01		901.713	36926.2	13732	34146.1	363.851	2087546	0.000174296	0.37358	0.00220137	12.63	48.9057	4.5558	0.360824	3.27649	1.01682	5.61166	0.0204475	4.5558	0.811845	3753.33	99.5245	130.484	11.7589	712.311	55.8882
DuffBrown_02		879.34	42488.8	13811.2	32849	1135.72	2504833	0.000453411	0.392718	0.00687132	15.1547	53.2739	2.21505	0.327108	1.74942	0.846217	2.82257	0.0187709	2.21505	0.784762	3603.58	53.6837	119.883	5.25972	622.571	25.9385
DuffBrown_03		787.779	40044.8	12495.4	30104	1609.65	2573446	0.000625485	0.364064	0.0097387	15.5698	58.9965	1.48795	0.304074	1.11174	0.710328	1.85741	0.0169501	1.48795	0.801092	3491.1	34.3891	108.352	3.19672	544.941	15.546
DuffBrown_04		728.268	47287.2	12583.5	28511.2	1654.28	3418723	0.000483887	0.38934	0.0100087	20.6839	64.47	1.27425	0.260014	1.20523	0.555835	1.75394	0.0155111	1.27425	0.726508	3246.79	37.9742	99.2234	2.50885	448.812	12.6459
DuffBrown_05		822.863	44663.8	12828.7	30098.5	1392.62	2897333	0.000480657	0.385856	0.00842563	17.5294	56.8491	1.79045	0.292799	1.77037	0.709827	2.51792	0.0175904	1.79045	0.711084	3432.54	54.9974	112.409	3.98915	544.643	21.0088
DuffBrown_06		685.047	39986.9	11165.5	26150.9	1479.88	2750336	0.000538072	0.340536	0.00895355	16.6401	62.2597	1.26733	0.278006	0.84015	0.615393	1.52052	0.0160617	1.26733	0.833485	3351.77	26.2578	102.718	2.5824	486.956	11.6956
DuffBrown_07		492.863	42612.7	11425.6	26254.9	1546.55	3116956	0.000496173	0.353707	0.00935692	18.8582	66.2233	1.19034	0.264428	0.797355	0.550304	1.43272	0.0151004	1.19034	0.830826	3273.28	25.071	96.616	2.28256	445.196	10.2756
DuffBrown_08		564.702	49738.8	13035.9	30257.2	2153.26	3494811	0.000616131	0.409824	0.0130276	21.1443	63.892	1.22135	0.261158	0.807161	0.563331	1.46397	0.0156514	1.22135	0.834274	3253.71	25.4181	100.114	2.42614	453.692	10.6567
DuffBrown_09		602.27	40148.1	10802.9	25106.2	1521.89	2872618	0.000529793	0.335046	0.00920775	17.3799	64.5892	1.38517	0.266809	0.939314	0.569307	1.67362	0.0154825	1.38517	0.827649	3287.37	29.5023	99.0416	2.72225	457.566	12.2555
DuffBrown_10		736.246	45490.4	12439.1	29359.8	1666.47	3126410	0.00053303	0.384527	0.0100825	18.9154	62.9703	1.337	0.268724	0.782345	0.588135	1.54908	0.0158805	1.337	0.863096	3298.6	24.5509	101.568	2.69408	469.676	11.5836
DuffBrown_11		517.02	42837.2	10371.3	23496.5	1170.8	3213681	0.000364318	0.337901	0.00708357	19.4434	67.984	1.27481	0.24322	1.10373	0.493059	1.68623	0.0147093	1.27481	0.756013	3141.16	35.0706	94.1319	2.38213	406.993	11.2458
DuffBrown_12		677.525	44338.4	11803.8	26831.6	1750.57	3186181	0.000549426	0.365516	0.0105913	19.277	64.8418	1.31048	0.259929	1.0285	0.552466	1.66589	0.0154221	1.31048	0.786657	3246.27	32.4073	98.6587	2.56562	446.61	11.9682
DuffBrown_13		457.527	37988	10758.7	24923.8	1622.75	2700387	0.000600932	0.324533	0.00981794	16.3378	63.7755	1.19464	0.277912	0.847571	0.600564	1.46476	0.01568	1.19464	0.815583	3351.24	26.4909	100.296	2.37735	477.592	11.1004
DuffBrown_14		657.997	43135.6	11106.1	25169.3	1663.75	3233283	0.00051457	0.349821	0.010066	19.562	67.3105	1.21984	0.252789	0.869511	0.517585	1.49801	0.0148565	1.21984	0.814302	3202.32	27.4928	95.0669	2.30189	423.537	10.3227
DuffBrown_15		515.652	40395.7	10442	23953.2	1415.09	2956908	0.00047857	0.329468	0.00856155	17.8899	66.066	1.23055	0.257388	1.03425	0.536928	1.60746	0.0151364	1.23055	0.765525	3230.79	32.6279	96.8442	2.36518	436.397	11.3405
DuffBrown_16		716.158	46236.7	12102.5	27658.7	1737.22	3323092	0.000522772	0.378837	0.0105105	20.1053	64.1047	1.30344	0.259933	0.755606	0.558827	1.50662	0.0155995	1.30344	0.865143	3246.3	23.8084	99.7844	2.58071	450.763	10.9096
DuffBrown_01		619.183	32709	10248.5	24340.8	3368.64	2142386	0.00157238	0.426238	0.0276506	17.5852	59.5531	1.31435	0.308142	1.36094	0.713103	1.892	0.0167917	1.31435	0.694687	3511.64	42.0354	107.348	2.79788	546.587	15.8691
DuffBrown_02		390.151	31278.3	7676.77	17236.2	3386.89	2437996	0.00138921	0.355892	0.0278004	20.0117	70.8457	1.18733	0.241184	1.11646	0.469182	1.6298	0.0141152	1.18733	0.728516	3127.8	35.5137	90.3561	2.13034	390.624	10.515
DuffBrown_03		560.578	31675.7	8802.8	19979.6	4114.77	2298803	0.00178996	0.382916	0.033775	18.8691	65.935	1.14745	0.276481	1.10134	0.577904	1.59047	0.0151664	1.14745	0.721454	3343.17	34.4435	97.0352	2.20981	463.114	11.761
DuffBrown_04		542.125	36251.2	9726.25	22313.5	5627.83	2687167	0.00209434	0.432525	0.0461946	22.0569	66.4364	1.17895	0.265217	0.768331	0.550175	1.40722	0.015052	1.17895	0.83779	3277.96	24.1496	96.3084	2.25359	445.111	10.0921
DuffBrown_05		602.885	36557	10009.6	22758.4	5840.2	2704887	0.00215913	0.439075	0.0479378	22.2024	67.0281	1.20533	0.272258	0.869262	0.559795	1.48608	0.0149191	1.20533	0.81108	3319.08	27.2355	95.4644	2.28396	451.393	10.7735
DuffBrown_06		558.633	33438.3	10157.2	24357	3347.83	2248146	0.00148915	0.430382	0.0274798	18.4533	62.1377	1.40176	0.299953	1.682	0.665279	2.18953	0.0160933	1.40176	0.64021	3469.98	52.1088	102.918	2.86178	517.838	17.6099
DuffBrown_07		471.72	33276.5	9109.03	21017.8	2958.07	2361274	0.00125274	0.401569	0.0242805	19.3819	65.1594	1.10796	0.270886	0.946198	0.572948	1.45701	0.015347	1.10796	0.760436	3311.16	29.664	98.1815	2.15878	459.919	10.7208
DuffBrown_08		870.27	29098.2	13546.2	33939.7	2007.21	1176700	0.00170579	0.485051	0.0164756	9.65864	37.2011	1.88319	0.469517	0.956555	1.73941	2.11221	0.0268809	1.88319	0.891576	4148.24	28.3506	170.997	6.35262	1023.24	26.877
DuffBrown_09		452.056	34053.1	9019.1	20949.8	4498.72	2453359	0.0018337	0.405488	0.0369266	20.1378	66.4619	1.11392	0.261862	0.98795	0.543007	1.48891	0.0150462	1.11392	0.748142	3257.94	31.101	96.2717	2.12849	440.405	10.5852
DuffBrown_10		587.653	34983.7	9500.47	22241.6	3954.86	2403103	0.00164573	0.422613	0.0324624	19.7252	65.1475	1.14197	0.267306	0.823303	0.565479	1.40781	0.0153498	1.14197	0.811169	3290.29	25.8527	98.1994	2.22544	455.087	10.2748
DuffBrown_11		492.64	34635.7	9669.4	22923	3918.78	2322308	0.00168745	0.425794	0.0321663	19.0621	62.6084	1.13517	0.279376	0.801985	0.614981	1.38989	0.0159723	1.13517	0.816735	3359.45	25.0505	102.15	2.30048	486.697	10.6917
DuffBrown_12		515.68	25437.7	8270.71	19917.3	3352.63	1531528	0.00218908	0.339642	0.0275192	12.5712	56.7095	1.36651	0.322133	1.25561	0.782863	1.85577	0.0176337	1.36651	0.736354	3580.05	38.5937	112.684	3.05218	587.115	16.4149
DuffBrown_13		507.093	26735.3	9407.62	22735.8	2547.72	1496353	0.00170262	0.372913	0.0209123	12.2824	53.0274	1.45926	0.349528	1.09485	0.908421	1.82431	0.0188582	1.45926	0.799893	3704.94	33.3642	120.436	3.48135	656.218	17.4835
DuffBrown_14		604.878	36092.7	9885.57	22468	4107.29	2464426	0.00166663	0.433509	0.0337136	20.2286	64.0677	1.1344	0.271937	0.992034	0.584972	1.50698	0.0156085	1.1344	0.752764	3317.23	31.0865	99.8416	2.24737	467.651	11.2325
DuffBrown_01		835.734	56569.8	15504.2	35932.3	6794.97	4075942	0.00166709	0.518341	0.0398467	23.9019	67.7107	0.882721	0.275953	0.662246	0.561673	1.10352	0.0147687	0.882721	0.799911	3340.18	20.7159	94.5091	1.65612	452.615	8.02819
DuffBrown_02		1039.7	64365.5	18938.7	44687.9	7401.65	4612742	0.00160461	0.614257	0.0434043	27.0498	66.2457	1.07929	0.292699	1.12337	0.608932	1.55783	0.0150953	1.07929	0.692814	3432	34.8996	96.5835	2.06895	482.886	11.9032
DuffBrown_03		1075.48	58063.4	17033.5	39753.2	6488.74	4071418	0.00159373	0.551186	0.0380509	23.8754	65.4595	0.951022	0.289296	0.81194	0.609082	1.25048	0.0152766	0.951022	0.760528	3413.83	25.2583	97.7348	1.84467	482.981	9.5672
DuffBrown_04		797.159	52851.5	16788.3	39773.5	5003.61	3530943	0.00141707	0.525093	0.0293419	20.706	62.5068	1.08469	0.311451	0.827479	0.686702	1.36429	0.0159983	1.08469	0.795062	3528.13	25.5281	102.315	2.20171	530.817	11.2175
DuffBrown_05		749.721	58711.9	15116.3	34586.6	6737.96	4432346	0.00152018	0.520301	0.0395124	25.9919	69.9828	0.977069	0.255479	0.810897	0.503118	1.26973	0.0142892	0.977069	0.769508	3219.04	25.6056	91.4623	1.77444	413.811	8.59427
DuffBrown_06		876.222	51980.6	14951.6	34454.5	5416.57	3616609	0.00149769	0.486573	0.0317636	21.2083	65.0192	0.993411	0.287994	0.91494	0.610445	1.35055	0.0153801	0.993411	0.735561	3406.81	28.4773	98.3915	1.93973	483.841	10.3432
DuffBrown_07		777.065	51723.8	14700.8	33634.1	4161.1	3657878	0.00113757	0.480199	0.0244013	21.4503	66.3586	0.883055	0.280624	0.600418	0.582819	1.06784	0.0150696	0.883055	0.826952	3366.41	18.7446	96.4204	1.69	466.272	7.95367
DuffBrown_08		951.921	57505.8	15469.1	35052.8	5197.18	4222941	0.0012307	0.518444	0.030477	24.7639	68.114	1.07638	0.268908	1.2757	0.544092	1.66914	0.0146813	1.07638	0.644875	3299.67	40.0296	93.9535	2.00762	441.119	11.8743
DuffBrown_09		854.807	57700.3	15209	34880.4	5410.61	4235758	0.00127737	0.517301	0.0317286	24.8391	67.9698	0.90139	0.262194	0.743521	0.531635	1.16847	0.0147124	0.90139	0.771426	3259.94	23.4026	94.1514	1.68479	432.894	8.20316
DuffBrown_10		690.461	52616.9	13164	30240.6	4637	4052886	0.00114412	0.460824	0.027192	23.7667	70.479	0.906233	0.252163	0.928251	0.493091	1.29727	0.0141886	0.906233	0.69857	3198.4	29.3593	90.8229	1.63438	407.015	8.66317
DuffBrown_11		911.857	52950.2	14912.6	34446.2	3597.7	3728238	0.000964987	0.490998	0.0210974	21.8629	65.8728	0.924696	0.281622	1.13585	0.589205	1.46466	0.0151808	0.924696	0.631339	3371.95	35.4456	97.1261	1.78253	470.36	10.9682
DuffBrown_12		855.888	55031.4	17071.9	39841.6	4420.79	3592564	0.00123054	0.537243	0.0259242	21.0673	61.642	0.939272	0.309113	0.618467	0.691108	1.1246	0.0162227	0.939272	0.835203	3516.5	19.0959	103.739	1.9329	533.466	9.29064
DuffBrown_01		431.964	32507.1	9029.45	20909.8	2328.96	2367339	0.000983787	0.373163	0.0194329	19.7531	66.2812	1.33795	0.274887	0.976589	0.571571	1.65645	0.0150872	1.33795	0.80772	3334.12	30.563	96.5322	2.56335	459.03	12.1611
DuffBrown_02		749.653	32069.2	12721.9	30709.4	1507.12	1592197	0.000946568	0.451171	0.0125755	13.2853	46.2993	2.07937	0.397498	1.39779	1.18322	2.50551	0.0215986	2.07937	0.829918	3899.64	42.0577	137.751	5.66545	792.814	27.2078
DuffBrown_03		643.619	30952.7	10997.6	26695.6	1167.76	1831178	0.000637711	0.41021	0.00974384	15.2794	52.1387	1.95406	0.360343	1.80829	0.952492	2.66238	0.0191796	1.95406	0.733953	3751.3	54.9347	122.469	4.73931	679.4	26.0388
DuffBrown_04		488.932	30957.2	7612.82	17279.6	1759.43	2330549	0.000754944	0.333743	0.0146808	19.4462	69.071	1.19952	0.244408	0.944675	0.487668	1.52684	0.0144779	1.19952	0.785618	3148.9	29.9979	92.6611	2.20669	403.32	10.1137
DuffBrown_05		622.658	28442.7	11120.4	27248.7	697.511	1412459	0.000493828	0.39925	0.00582005	11.7856	41.1796	4.9551	0.396003	3.28172	1.32533	5.94329	0.0242839	4.9551	0.83373	3893.97	98.7781	154.673	15.1282	856.842	66.56
DuffBrown_06		485.241	25062.3	7728.35	18024.9	1982.04	1677154	0.00118179	0.30366	0.0165382	13.9942	61.034	1.24098	0.308858	0.735963	0.697417	1.4428	0.0163843	1.24098	0.860119	3515.22	22.7258	104.764	2.57867	537.247	11.9676
DuffBrown_07		408.908	28966.8	8505.71	19804.3	1585.9	1891946	0.000838237	0.342271	0.0132328	15.7865	61.0031	1.5541	0.295417	1.27474	0.667406	2.01003	0.0163926	1.5541	0.773175	3446.36	39.5603	104.817	3.23077	519.134	16.2084
DuffBrown_08		440.846	31463.2	7955.98	17976.8	1938.6	2297084	0.000843938	0.342983	0.0161757	19.1669	67.9409	1.21563	0.252222	1.02513	0.511633	1.59017	0.0147187	1.21563	0.764465	3198.77	32.4224	94.1912	2.27298	419.546	10.8715
DuffBrown_01		939.802	43650.1	13293.8	31379.9	3016.59	2836157	0.00106362	0.467146	0.0199692	18.7747	59.1267	1.4113	0.304827	1.21528	0.710519	1.86244	0.0169128	1.4113	0.75777	3494.93	37.5816	108.115	3.0255	545.054	15.5902
DuffBrown_02		827.634	37591.9	12651.9	30431	2050.66	2339353	0.000876594	0.42669	0.0135749	15.486	56.9187	1.33516	0.337309	1.18727	0.81673	1.78669	0.0175689	1.33516	0.747281	3650.62	36.3146	112.273	2.97141	606.223	16.182
DuffBrown_03		642.544	43997.7	10332.9	22831.2	2422.89	3457869	0.00070069	0.40811	0.016039	22.8903	71.4284	1.07685	0.2342	0.81799	0.451878	1.3523	0.014	1.07685	0.79631	3080.97	26.1199	89.6241	1.91659	378.594	8.51143
DuffBrown_04		681.854	40018.9	11926	27845.2	2208.46	2790075	0.000791541	0.422011	0.0146195	18.4697	63.2706	1.20599	0.296008	1.17012	0.644773	1.68036	0.0158051	1.20599	0.717699	3449.46	36.3052	101.09	2.41879	505.257	13.2898
DuffBrown_05		998.059	45353.9	13977.2	33023.6	3708.34	2996910	0.00123739	0.488465	0.0245484	19.8389	60.5409	1.43445	0.30454	1.38218	0.693268	1.992	0.0165178	1.43445	0.720104	3493.47	42.7474	105.61	3.00447	534.762	16.4288
DuffBrown_06		570.048	32922.6	9657.4	22651.7	2065.69	2207141	0.00093591	0.345011	0.0136744	14.6108	61.9093	1.39021	0.290032	1.23634	0.645648	1.86044	0.0161526	1.39021	0.747251	3417.78	38.4494	103.295	2.84851	505.797	14.7158
DuffBrown_07		771.862	42005.3	11022.2	24881.5	2638.78	2994101	0.000881327	0.412062	0.0174681	19.8203	65.6385	1.28378	0.259154	0.986712	0.544134	1.61916	0.015235	1.28378	0.792865	3241.57	31.1019	97.4703	2.4833	441.147	11.5214
DuffBrown_08		704.311	48142.1	12130.1	27310	3217.98	3488063	0.000922568	0.463224	0.0213023	23.0902	66.9609	1.14612	0.24818	0.775208	0.510801	1.38367	0.0149341	1.14612	0.828321	3173.2	24.5683	95.5596	2.17394	418.988	9.45614
DuffBrown_09		485.517	36159.2	9333.09	21246	2274.47	2638466	0.000862043	0.35298	0.0150565	17.4661	67.0204	1.12131	0.255309	1.00044	0.525007	1.50274	0.0149208	1.12131	0.746178	3217.99	31.5934	95.4753	2.12502	428.49	10.452
DuffBrown_10		687.636	45117.7	11288.8	25346.4	2857.05	3280475	0.000870927	0.432392	0.0189131	21.716	67.3548	1.30763	0.249961	1.22373	0.511459	1.79093	0.0148468	1.30763	0.730144	3184.52	38.7477	95.0048	2.46594	419.43	12.233
DuffBrown_11		808.675	39360.1	13398.2	31746.3	2195.03	2311565	0.000949584	0.446946	0.0145306	15.302	55.1673	1.65547	0.339985	1.70846	0.849345	2.37895	0.0181267	1.65547	0.695883	3662.7	52.2128	115.806	3.79891	624.29	21.9487
DuffBrown_12		732.433	40319.8	12268.8	29209.2	2302.21	2593818	0.000887577	0.43263	0.0152401	17.1705	60.2521	1.31167	0.305842	1.20322	0.69957	1.77995	0.0165969	1.31167	0.736915	3500.07	37.1947	106.113	2.76031	538.534	14.7705
DuffBrown_13		510.001	40966.7	10060.4	22385	2233.99	3036782	0.000735645	0.388278	0.0147885	20.1028	70.2656	1.19531	0.244268	1.06098	0.479105	1.59826	0.0142317	1.19531	0.747879	3147.99	33.6936	91.0968	2.1621	397.458	10.4593
DuffBrown_14		850.899	44880.6	15145.5	35650.9	3062.83	2645132	0.00115791	0.506037	0.0202753	17.5102	55.855	1.51574	0.332052	1.27594	0.819314	1.98129	0.0179035	1.51574	0.76503	3626.58	39.0914	114.392	3.43629	607.666	17.9599
DuffBrown_15		828.842	51871.2	14306.7	32698.6	3734.13	3540344	0.00105474	0.522959	0.0247191	23.4363	64.9629	1.1059	0.273538	0.937919	0.580307	1.45007	0.0153934	1.1059	0.762651	3326.42	29.3701	98.4762	2.16117	464.658	10.7563
DuffBrown_01		921.104	38397.2	12764.4	31261.2	2830.96	2354234	0.0012025	0.435935	0.0212434	17.6661	55.6696	1.36338	0.332328	0.908957	0.822727	1.63859	0.0179631	1.36338	0.832039	3627.85	27.8457	114.77	3.10105	609.568	14.9098
DuffBrown_02		846.198	51128.6	13137.2	29953.2	2361.56	3772748	0.000625953	0.498325	0.0177211	28.3106	66.8553	1.25485	0.254073	1.43111	0.523756	1.90334	0.0149577	1.25485	0.659285	3210.33	45.2212	95.7093	2.38383	427.657	13.1997
DuffBrown_03		761.948	43501	12917.3	30604.6	2475.1	2974855	0.000832008	0.460265	0.0185731	22.3232	60.8858	1.33169	0.297886	0.854283	0.67428	1.58215	0.0164242	1.33169	0.841697	3459.27	26.4866	105.017	2.77375	523.311	12.8578
DuffBrown_04		829.664	45588.7	13647.7	32503.8	2427.96	3117114	0.000778913	0.485215	0.0182193	23.3907	61.936	1.21899	0.299507	0.783856	0.666453	1.44927	0.0161457	1.21899	0.84111	3467.67	24.2882	103.251	2.4967	518.554	11.7025
DuffBrown_05		904.855	39908.8	15015.1	36960.9	3162.45	2217998	0.00142581	0.48598	0.0237309	16.6438	49.8078	1.30887	0.368744	1.03148	1.02031	1.66646	0.0200772	1.30887	0.785418	3786.27	31.2635	128.144	3.32048	714.07	16.9488
DuffBrown_06		782.862	43819	13183.7	30928	5457.01	2817145	0.00193707	0.465067	0.0409492	21.1398	60.0903	1.12604	0.29884	0.825785	0.685393	1.39638	0.0166416	1.12604	0.806397	3464.22	25.5938	106.396	2.37602	530.029	11.467
DuffBrown_07		908.672	42658.4	12854.9	29806.8	3355.17	2757393	0.00121679	0.451259	0.0251771	20.6914	60.7637	1.1064	0.301441	0.791234	0.683698	1.36021	0.0164572	1.1064	0.813403	3477.64	24.499	105.226	2.30913	529.007	11.1552
DuffBrown_08		805.682	36525.4	10667	25123.5	2422.59	2409906	0.00100526	0.38248	0.0181791	18.0839	62.4549	1.26965	0.291218	1.12403	0.642624	1.69572	0.0160115	1.26965	0.748739	3424.12	34.9404	102.399	2.57918	503.93	13.3834
DuffBrown_09		725.324	35962.4	11245.2	26762	3652.7	2321100	0.0015737	0.391226	0.0274098	17.4175	60.9846	1.22685	0.307781	1.18124	0.695549	1.70308	0.0163976	1.22685	0.720372	3509.83	36.4895	104.848	2.55135	536.129	14.0895
DuffBrown_10		799.312	34607.3	10776	24970.1	3844.58	2222714	0.00172968	0.3721	0.0288496	16.6792	60.2987	1.13148	0.305349	0.788438	0.697903	1.37909	0.0165841	1.13148	0.820455	3497.57	24.3772	106.031	2.37938	537.538	11.4468
DuffBrown_11		779.048	32578.8	12058.7	29521.4	2444.55	1743662	0.00140196	0.392227	0.0183438	13.0844	52.1965	1.34847	0.366227	0.940699	0.966976	1.64416	0.0191584	1.34847	0.820153	3775.89	28.5314	122.335	3.26735	686.904	16.283
DuffBrown_12		758.961	44904.3	12605.3	29405.4	2634.27	3078019	0.000855834	0.459695	0.0197675	23.0974	66.1232	1.14522	0.276803	0.880771	0.57693	1.44474	0.0151233	1.14522	0.792679	3344.99	27.5416	96.7612	2.19932	462.486	10.6776
DuffBrown_13		770.206	35931.9	10888.6	25665.4	2772.25	2312578	0.00119877	0.383379	0.0208029	17.3535	61.8928	1.48142	0.309272	1.11451	0.688662	1.85384	0.016157	1.48142	0.799107	3517.29	34.4098	103.322	3.03614	531.996	15.2382
DuffBrown_14		623.651	40776.3	11181.9	26072.3	3899.4	2792610	0.00139633	0.412705	0.029261	20.9557	66.0145	1.15564	0.272915	1.00149	0.569762	1.52921	0.0151482	1.15564	0.755709	3322.85	31.3695	96.9193	2.22294	457.861	11.2096
DuffBrown_15		637.301	40190	12231.9	29120.2	4856.92	2605664	0.00186399	0.431277	0.0364462	19.5528	62.3133	1.12024	0.301152	0.76733	0.666056	1.35785	0.0160479	1.12024	0.825016	3476.16	23.7614	102.63	2.28081	518.311	10.9644
DuffBrown_16		813.015	43154.7	11859.3	27759.2	4873.24	2970486	0.00164055	0.437788	0.0365687	22.2904	66.6169	1.08057	0.275277	0.686089	0.569496	1.27998	0.0150112	1.08057	0.844209	3336.34	21.468	96.0494	2.06005	457.689	9.38827
DuffBrown_17		692.16	42439.4	11253.4	25747.3	3681.24	3001825	0.00122633	0.42016	0.0276239	22.5256	68.4502	1.20032	0.266297	1.16693	0.536163	1.67406	0.0146092	1.20032	0.717011	3284.35	36.6598	93.4954	2.22791	435.892	11.7968
DuffBrown_18		630.449	36656.4	10710.6	24844	3473.52	2448026	0.00141891	0.381925	0.0260652	18.3699	64.0483	1.16683	0.289078	0.73085	0.622033	1.37682	0.0156132	1.16683	0.847481	3412.66	22.7377	99.8716	2.31228	491.121	10.6661
DuffBrown_19		769.375	42874.8	11875.8	27802.3	5375.85	2944578	0.00182568	0.436624	0.0403402	22.096	66.344	1.11097	0.274162	0.976499	0.569524	1.47913	0.015073	1.11097	0.751102	3329.99	30.5699	96.4415	2.12658	457.707	10.8415
DuffBrown_01		793.828	25051	13007.9	33349.2	494.696	744869	0.000664139	0.507376	0.00472254	7.11078	29.7445	2.50536	0.513748	0.873855	2.3804	2.65338	0.0336197	2.50536	0.944213	4281.15	25.7043	213.163	10.4978	1236.73	37.2521
DuffBrown_02		509.208	38650.7	10064.8	22946.9	2438.79	2666498	0.000914603	0.509183	0.0232815	25.4553	70.5744	0.956355	0.258631	0.627056	0.505055	1.1436	0.0141694	0.956355	0.836269	3238.39	19.7702	90.701	1.72247	415.119	7.76351
DuffBrown_03		698.245	31408.7	11685.5	29091.4	1365.13	1584208	0.000861713	0.5129	0.013032	15.1234	51.5749	1.51712	0.372249	1.01831	0.994722	1.82719	0.0193893	1.51712	0.830303	3800.6	30.8354	123.795	3.71933	701.127	18.3373
DuffBrown_04		500.269	35485.4	9463.06	21719.8	1763.14	2398444	0.000735117	0.473697	0.0168315	22.8964	68.6411	1.08635	0.266914	1.10081	0.535912	1.54659	0.0145685	1.08635	0.702418	3287.99	34.5729	93.2373	2.01088	435.726	10.9001
DuffBrown_05		618.907	31333.1	8806.64	20459.3	1871.72	2008963	0.000931683	0.430573	0.0178681	19.1783	64.9726	1.36497	0.288917	1.49225	0.612843	2.02237	0.0153911	1.36497	0.674939	3411.79	46.4288	98.4617	2.66698	485.352	15.4868
DuffBrown_06		926.538	48320.7	15632.1	37681.6	2464.95	2783563	0.000885537	0.722141	0.0235312	26.5729	59.7534	1.22596	0.326861	1.18182	0.753886	1.70284	0.0167354	1.22596	0.719948	3602.42	36.2688	106.991	2.60115	570.477	14.7563
DuffBrown_07		1037.59	43085.9	16400.1	40046.6	2047.14	2199240	0.000930838	0.707208	0.0195427	20.9947	52.7141	1.12759	0.38194	0.69474	0.99856	1.32443	0.0189702	1.12759	0.851375	3839.46	20.9843	121.145	2.70595	703.079	13.3502
DuffBrown_08		505.172	41069.2	10561.2	24065.8	3005.5	2829923	0.00106204	0.537843	0.0286916	27.0154	70.8705	1.03987	0.254682	0.778399	0.495267	1.29894	0.0141102	1.03987	0.800557	3214.11	24.589	90.3247	1.86516	408.494	8.69977
DuffBrown_09		793.04	37424	10237.4	23477.7	2385.1	2471686	0.00096497	0.505463	0.022769	23.5956	66.7879	1.25097	0.268939	1.00886	0.55496	1.60709	0.0149728	1.25097	0.778408	3299.85	31.6562	95.8053	2.37883	448.241	11.5815
DuffBrown_10		573.931	35007	9908.56	22870.7	2451.24	2185170	0.00112176	0.481641	0.0234003	20.8604	64.164	1.28914	0.286061	1.10489	0.614432	1.69784	0.0155851	1.28914	0.75928	3396.33	34.4165	99.693	2.55008	486.352	13.0383
DuffBrown_11		543.765	31666.6	9728.51	22929.5	2097.96	1870719	0.00112147	0.457045	0.0200278	17.8585	60.0151	1.10728	0.306891	0.802645	0.704741	1.36759	0.0166625	1.10728	0.809657	3505.36	24.8025	106.528	2.33932	541.619	11.4168
DuffBrown_12		866.372	39450.3	12751.8	30897.4	1812.28	2286902	0.000792462	0.590446	0.0173007	21.8316	58.7134	1.26629	0.326784	0.967809	0.767061	1.59379	0.0170319	1.26629	0.79452	3602.06	29.7018	108.87	2.7335	578.075	13.9534
DuffBrown_13		555.571	36617.2	10918.2	25163.3	2334.62	2240793	0.00104187	0.516545	0.0222871	21.3914	62.3577	1.21369	0.299255	0.989731	0.661389	1.56608	0.0160365	1.21369	0.774986	3466.37	30.6702	102.558	2.4693	515.463	12.5825
DuffBrown_14		625.928	40891	11137	25362.2	3221.82	2667398	0.00120785	0.54988	0.0307566	25.4639	66.8309	0.996459	0.270519	0.588945	0.557861	1.15749	0.0149631	0.996459	0.860878	3309.03	18.4669	95.7441	1.89372	450.133	8.38264
DuffBrown_15		432.882	37044.8	9418.9	21521.5	2836.16	2511023	0.00112948	0.483055	0.027075	23.9711	70.2354	0.988414	0.25365	0.639171	0.497719	1.17707	0.0142378	0.988414	0.839722	3207.69	20.2012	91.1357	1.78867	410.157	7.91269
25-03_Line1_14	low Pb	bd	11.3978	8.08651	11.8371	12.6614	60.5506	0.209105	9.24612e-05	5.31314e-05	0.00025409	5.81128	40.2606	0.144015	106.491	3.41541	113.848	0.172079	40.2606	0.353635	2276.04	3668.91	1023.56	720.295	1507.95	1031.32
25-03_Line1_21	low Pb	bd	17.0228	11.896	48.934	10.3177	116.799	0.0883371	0.000229823	4.32963e-05	0.000490125	7.78376	27.1571	0.191523	79.5507	3.39108	84.0584	0.128473	27.1571	0.323074	2755.29	2613.47	779.146	386.774	1502.34	844.975
25-03_Line1_26	low Pb	bd	17.8796	8.19884	16.855	14.7028	103.848	0.14158	0.00012674	6.16975e-05	0.000435779	5.09035	17.6932	0.343244	31.924	9.29312	36.4991	0.19645	17.6932	0.484755	3677.27	974.671	1156.22	364.074	2367.34	514.041
25-03_Line1_13	low Pb	bd	18.3968	18.2373	23.8678	5.83178	88.6152	0.0658102	0.000178603	2.4472e-05	0.000371858	7.60245	34.9678	0.0922361	231.738	1.67207	234.362	0.131537	34.9678	0.149204	1472.25	8795.63	796.625	503.861	997.971	1390.49
25-03_Line1_20	low Pb	bd	20.4603	13.8684	-0.259719	23.5989	231.168	0.102085	0.000100572	9.90288e-05	0.000970057	10.5	20.7091	0.0490791	330.246	0.644189	330.895	0.0952382	20.7091	0.0625851	151.611	15475.2	586.442	228.09	504.897	1298.63
25-03_Line1_22	low Pb	bd	20.4603	10.1748	9.93332	59.5365	221.962	0.268229	0.000119758	0.000249834	0.000931424	11.2407	20.4448	0.252715	35.7761	3.09844	41.2058	0.0889622	20.4448	0.496163	3201.85	1131.24	549.397	211.821	1432.3	491.748
25-03_Line1_09	low Pb	bd	21.428	10.9436	22.4106	30.1494	147.391	0.204555	0.000161718	0.000126517	0.000618499	7.48572	21.4531	0.0045425	3745.05	0.083631	3745.11	0.133588	21.4531	0.0057283	#NUM!	#NUM!	808.3	317.976	81.5529	1943.52
25-03_Line1_25	low Pb	bd	22.3958	8.83407	23.2043	55.0254	221.226	0.24873	0.00016069	0.000230904	0.000928334	8.79843	15.7419	0.0251968	670.42	0.394681	670.604	0.113657	15.7419	0.0234742	#NUM!	#NUM!	693.949	203.875	337.783	1591.79
25-03_Line1_11	low Pb	bd	22.8412	13.2373	25.5852	38.7245	172.487	0.224507	0.000182032	0.0001625	0.000723809	7.75687	17.2292	0.362129	40.4033	6.43403	43.9235	0.128918	17.2292	0.392256	3758.81	1226.82	781.69	248.804	2036.93	574.184
25-03_Line1_05	low Pb	bd	23.2728	15.8643	39.685	43.1302	125.771	0.342927	0.000232684	0.000180988	0.000527776	5.5954	18.3073	0.396224	43.0647	9.75923	46.7945	0.178718	18.3073	0.391227	3894.81	1296.16	1059.97	348.293	2412.31	624.048
25-03_Line1_16	low Pb	bd	24.4285	19.0389	45.7082	10.3177	75.228	0.137152	0.000263248	4.32963e-05	0.000315681	2.82594	15.2726	0.163837	124.118	7.99016	125.054	0.353865	15.2726	0.122128	2495.65	4180.36	1953.03	495.152	2229.91	1188.28
25-03_Line1_03	low Pb	bd	26.3333	20.3087	28.7598	28.7453	138.787	0.207118	0.000222587	0.000120624	0.000582395	5.40621	14.9334	0.316592	62.863	8.07074	64.6124	0.184972	14.9334	0.231122	3553.36	1935.87	1094.08	293.746	2238.97	777.142
25-03_Line1_01	low Pb	bd	30.4603	20.9437	42.7203	30.2135	163.356	0.184955	0.000277856	0.000126786	0.000685496	5.4229	16.1317	0.539709	30.1605	13.7162	34.2036	0.184403	16.1317	0.471636	4353.51	883.641	1090.99	315.944	2730.31	500.812
25-03_Line1_08	low Pb	bd	33.0833	18.7686	31.2449	13.5468	144.255	0.0939089	0.000245303	5.68469e-05	0.000605341	3.65461	13.6579	0.387506	37.6919	14.6131	40.0901	0.273627	13.6579	0.340679	3861.29	1136.87	1559.19	367.625	2790.39	568.484
25-03_Line1_02		bd	152.719	127.475	345.156	11.0468	239.261	0.0461706	0.00184604	4.63561e-05	0.00100402	1.41653	5.82705	0.837628	6.35756	81.4953	8.62398	0.705953	5.82705	0.67568	4987.1	180.568	3443.18	303.625	4480.62	159.756
25-03_Line1_04		bd	368.558	281.739	744.643	15.5092	1688.2	0.00918685	0.00411788	6.50817e-05	0.00708422	4.38353	3.56389	0.806154	3.72073	25.3454	5.1522	0.228127	3.56389	0.691723	4932.65	105.933	1324.67	84.7903	3321.62	95.9754
25-03_Line1_06		bd	583.687	482.242	1206.33	53.3485	2038.54	0.02617	0.00670773	0.000223867	0.00855436	3.38848	4.15879	0.842269	3.14198	34.2572	5.21226	0.295118	4.15879	0.797887	4994.95	89.2084	1667.05	121.037	3617.48	97.9649
25-03_Line1_07		bd	1072.55	909.751	2301.01	26.3643	2754.54	0.00957123	0.0126444	0.000110633	0.0115589	2.35279	3.93783	0.832225	2.15727	48.7487	4.49002	0.425027	3.93783	0.877018	4977.91	61.296	2283.26	149.674	3967.09	85.6342
25-03_Line1_10		bd	273.231	218.881	531.251	12.0786	917.055	0.0131711	0.00302098	5.06857e-05	0.00384826	3.43341	4.03234	0.881473	4.92971	35.3826	6.36881	0.291256	4.03234	0.633138	5059.44	139.574	1647.8	116.211	3649.38	118.579
25-03_Line1_12		bd	2572.18	2062.95	5085.77	165.51	6105.98	0.0271062	0.0286963	0.000694533	0.0256227	2.14417	4.30921	0.80128	1.56223	51.5029	4.58365	0.466382	4.30921	0.940127	4924.01	44.4954	2467.68	174.323	4021.8	87.4354
25-03_Line1_15		bd	114.977	90.931	225.548	7.31668	208.454	0.0350997	0.00127366	3.07031e-05	0.000874742	1.65776	6.07995	0.803835	6.11699	66.827	8.62458	0.603224	6.07995	0.704956	4928.55	174.189	3042.82	288.391	4281.83	159.374
25-03_Line1_17		4406.48	80837.2	67450.8	168645	281.349	80437.1	0.00349775	0.935591	0.00118063	0.33754	0.865473	8.98949	0.845565	0.719397	134.648	9.01823	1.15544	8.98949	0.996813	5000.49	20.4204	4950.81	593.145	4985.59	167.23
25-03_Line1_18		bd	201.429	154.912	378.776	77.5053	2046.15	0.0378786	0.00217008	0.000325237	0.00858631	9.81349	4.79214	0.810717	5.98007	11.3855	7.66329	0.101901	4.79214	0.625338	4940.68	170.197	625.537	56.8846	2555.24	133.837
25-03_Line1_19		340.653	5619.65	4853.8	12592	336.101	101706	0.00330463	0.0680895	0.00141039	0.426792	17.1582	1.99263	0.854326	1.08814	6.8621	2.27038	0.0582811	1.99263	0.877664	5015.12	30.8676	365.163	14.1327	2093.77	39.4648
25-03_Line1_23		bd	925.959	786.264	1945.77	55.8319	3593.99	0.0155348	0.0107985	0.000234289	0.0150815	3.61766	3.48597	0.852314	2.16945	32.4697	4.10591	0.276422	3.48597	0.849013	5011.77	61.5504	1573.32	96.6034	3564.64	77.8297
25-03_Line1_24		bd	101.428	71.7374	150.918	28.4124	730.559	0.0388914	0.000956699	0.000119228	0.00306566	6.68521	6.26198	0.812918	7.56016	16.7586	9.81674	0.149584	6.26198	0.637888	4944.54	215.131	898.631	104.205	2921.12	172.593
25-03_Line1_27		bd	524.215	496.419	1211.33	11.2849	751.889	0.0150088	0.00658878	4.73553e-05	0.00315517	1.42275	3.36331	0.934488	3.05218	90.5213	4.54177	0.702864	3.36331	0.740529	5141.98	86.114	3431.5	176.541	4586.05	87.357
25-03_Line1_28		bd	4448.82	3773.94	9288.4	306.525	10144.1	0.0302169	0.0516932	0.00128628	0.0425681	2.11449	3.00919	0.843949	1.02494	55.0069	3.17895	0.472927	3.00919	0.946599	4997.78	29.0967	2496.39	123.381	4087.4	61.5035
25-03_Line1_29		bd	589.514	470.313	1199.42	146.047	14603	0.0100011	0.00666933	0.000612861	0.0612791	22.4267	4.2122	0.790888	3.19754	4.86021	5.28838	0.0445897	4.2122	0.796502	4905.41	91.1489	281.219	23.1402	1795.39	85.3764
25-03_Line1_30		bd	1027.2	868.524	2221.38	148.587	6073.21	0.024466	0.0121537	0.000623519	0.0254851	5.54605	2.10214	0.830227	2.27933	20.6309	3.1007	0.180309	2.10214	0.677957	4974.5	64.7739	1068.66	41.2705	3121.41	58.3478
25-03_Line1_31		bd	175.149	152.531	393.049	19.0523	1748.19	0.0108983	0.0021276	7.99496e-05	0.00733597	9.80609	5.41879	0.878282	5.91275	12.3437	8.02022	0.101977	5.41879	0.675641	5054.31	167.444	625.987	64.33	2630.9	140.484
25-03_Line1_32		bd	1556.31	1290.02	3319.41	168.428	9146.86	0.0184138	0.0182013	0.00070678	0.0383832	5.7437	1.78049	0.830561	1.61287	19.929	2.40239	0.174104	1.78049	0.741131	4975.07	45.8334	1034.68	33.9504	3087.92	45.4245
25-03_Line1_33		306.342	4601.15	4027.34	10126.5	46.8379	1199.77	0.0390392	0.055365	0.000196547	0.0050346	0.227965	4.49028	0.878479	0.953254	531.092	4.59035	4.38664	4.49028	0.9782	5054.63	26.995	10855.3	455.008	6373.37	89.0248
25-03_Line1_34		bd	142.961	101.556	424.644	47.7673	830.841	0.0574927	0.00197538	0.000200447	0.00348648	4.78594	13.6536	0.788143	15.1342	22.6957	20.383	0.208946	13.6536	0.669854	4900.46	431.512	1223.2	297.282	3213.99	334.702
25-03_Line2_02	low Pb	bd	29.5228	14.4357	22.321	263.898	636.363	0.414696	0.000195658	0.0011074	0.00267039	21.5734	15.1879	0.359359	31.4909	2.29571	34.9621	0.0463534	15.1879	0.434409	3747.15	956.938	292.095	86.1673	1210.97	402.915
25-03_Line2_03	low Pb	bd	32.4275	16.4914	32.1329	198.587	595.3	0.333592	0.000239266	0.000833336	0.00249807	17.3659	13.6456	0.212597	61.6116	1.68719	63.1046	0.0575842	13.6456	0.216237	2925.44	1993.53	360.917	95.0869	1003.7	592.545
25-03_Line2_04	low Pb	bd	23.7936	6.2373	47.8076	100.187	421.198	0.237861	0.00022978	0.000420416	0.00176748	17.0254	18.5093	-0.0545419	257.183	-0.441509	257.848	0.0587358	18.5093	0.0717835	#NUM!	#NUM!	367.933	131.048	-591.477	#VALUE!
25-03_Line2_05	low Pb	bd	13.3174	13.0276	23.2787	121.961	298.173	0.409028	0.00014649	0.000511788	0.00125123	21.4326	23.9065	0.303336	60.8877	1.95054	65.4128	0.046658	23.9065	0.365472	3487.34	1883.94	293.971	135.956	1098.63	632.773
25-03_Line2_08	low Pb	bd	46.3925	34.8408	114.852	67.9287	401.646	0.169126	0.000578847	0.000285051	0.00168544	7.54981	11.0196	0.573741	17.2708	10.4733	20.4869	0.132454	11.0196	0.537884	4442.87	503.584	801.847	164.066	2477.56	322.633
25-03_Line2_19	low Pb	bd	56.1271	37.3306	116.492	95.282	245.516	0.388088	0.000619773	0.000399834	0.00103027	4.04729	15.1647	0.237159	46.3502	8.07572	48.7679	0.247079	15.1647	0.310957	3101	1477.6	1423.39	376.177	2239.53	634.421
25-03_Line2_27	low Pb	bd	15.1478	6.7373	-3.28392	190.787	466.3	0.409151	5.49108e-05	0.000800604	0.00195675	29.4854	21.6771	-0.132378	110.188	-0.61875	112.3	0.0339151	21.6771	0.193028	#NUM!	#NUM!	215.005	91.0304	-979.134	#VALUE!
25-03_Line2_29	low Pb	bd	27.8374	36.3405	75.6227	59.0577	232.971	0.253498	0.000412693	0.000247825	0.00097762	7.01904	17.4642	-0.0576842	409.251	-1.13262	409.623	0.14247	17.4642	0.0426348	#NUM!	#NUM!	858.612	274.842	#VALUE!	#VALUE!
25-03_Line2_30	low Pb	bd	34.6708	22.8484	76.2423	33.8064	234.423	0.144211	0.000394866	0.000141863	0.000983713	3.77941	20.0208	0.888758	15.6652	32.409	25.421	0.264591	20.0208	0.787567	5071.09	443.305	1513.29	518.641	3562.8	407.09
25-03_Line2_01		bd	899.785	790.916	2102.24	27.158	987.826	0.0274927	0.0111968	0.000113964	0.00414524	0.940279	4.8984	0.834861	2.14033	122.367	5.34559	1.06351	4.8984	0.916344	4982.4	60.8026	4669.85	317.54	4889.23	102.341
25-03_Line2_06		bd	353.9	282.833	709.227	52.6061	521.926	0.100792	0.00397329	0.000220752	0.00219017	1.49533	3.70625	0.840932	3.9965	77.5053	5.45053	0.668751	3.70625	0.679979	4992.69	113.482	3301.05	188.705	4430.28	103.788
25-03_Line2_07		bd	79.1701	75.1749	162.094	208.905	534.836	0.390596	0.000934132	0.000876632	0.00224434	6.1638	7.35382	1.24759	9.99155	27.8951	12.406	0.162238	7.35382	0.592761	5546.33	277.467	969.199	131.008	3415.42	218.039
25-03_Line2_09		bd	355.71	313.708	770.607	89.0629	799.12	0.111451	0.00425097	0.000373737	0.00335336	2.30571	10.0067	0.869784	5.51177	51.9892	11.4243	0.433707	10.0067	0.875917	5040.54	156.181	2322.41	378.921	4031.16	205.377
25-03_Line2_10		bd	439.173	376.271	948.144	73.9835	692.332	0.106861	0.00520614	0.000310459	0.00290525	1.5007	3.86974	0.836109	3.35764	76.7848	5.12334	0.666357	3.86974	0.755316	4984.52	95.3751	3291.79	196.487	4420.92	97.8369
25-03_Line2_11		bd	448.528	355.073	903.814	112.079	725.659	0.154451	0.00504032	0.000470319	0.0030451	1.64938	3.9345	0.839232	3.88826	70.1241	5.53162	0.606288	3.9345	0.711274	4989.82	110.422	3055.12	188.678	4330.03	105.121
25-03_Line2_12		bd	1361.46	1160.82	2982.02	128.287	1272.62	0.100805	0.0162488	0.000538333	0.00534033	0.909937	3.12793	0.853317	1.71507	129.242	3.56727	1.09898	3.12793	0.876842	5013.44	48.6554	4779.69	207.763	4944.3	69.456
25-03_Line2_13		bd	506.655	381.073	1015.27	89.8565	709.268	0.126689	0.00561769	0.000377067	0.00297632	1.33056	3.81931	0.797669	3.5813	82.6219	5.23573	0.751565	3.81931	0.729471	4917.58	102.032	3613.28	207.899	4494.4	99.9674
25-03_Line2_14		bd	875.635	731.101	1782.12	92.3491	695.235	0.132831	0.0100039	0.000387527	0.00291743	0.785984	3.2164	0.844574	2.30404	148.091	3.95649	1.27229	3.2164	0.812942	4998.83	65.4061	5291.14	228.105	5081.54	76.827
25-03_Line2_15		bd	779.679	642.214	1615.32	68.9115	688.635	0.10007	0.0089659	0.000289175	0.00288974	0.863677	6.30632	0.829413	2.75553	132.35	6.88205	1.15784	6.30632	0.916343	4973.1	78.3115	4957.99	422.14	4968.25	130.019
25-03_Line2_16		bd	100.619	86.0923	207.476	99.3804	470.363	0.211285	0.00116365	0.000417032	0.00197379	4.31172	6.34824	0.877254	7.80243	28.0401	10.0587	0.231926	6.34824	0.631117	5052.65	220.974	1344.58	152.274	3420.5	180.247
25-03_Line2_17		bd	183.477	134.277	344.904	99.3804	361.455	0.274945	0.00195618	0.000417032	0.00151678	1.78085	7.06668	0.797683	6.28221	61.7319	9.45538	0.561531	7.06668	0.747372	4917.6	178.982	2872.95	319.578	4202.54	173.29
25-03_Line2_18		bd	204.56	195.509	478.778	55.0254	271.645	0.202564	0.00259437	0.000230904	0.00113991	1.2508	6.95521	0.952537	4.95519	104.954	8.53984	0.799488	6.95521	0.814443	5168.95	139.648	3787.28	386.576	4734.74	158.711
25-03_Line2_20		bd	330.462	264.905	694.911	75.1616	1859.14	0.0404282	0.00380892	0.000315402	0.00780154	5.51994	5.70988	0.81531	4.05348	20.3561	7.00239	0.181161	5.70988	0.815419	4948.72	115.324	1073.32	111.932	3108.43	127.229
25-03_Line2_21		bd	1506.63	1257.09	3047.79	136.477	30128.3	0.00452987	0.0171557	0.000572703	0.126428	17.0765	5.92189	0.828772	1.84984	6.68872	6.20409	0.0585602	5.92189	0.954514	4972	52.5746	366.863	42.0994	2071.13	104.083
25-03_Line2_22		bd	4798.95	4015.17	10234.3	106.638	78943.2	0.00135083	0.0562312	0.00044749	0.331271	15.2195	6.61081	0.834464	1.13342	7.55638	6.70727	0.0657052	6.61081	0.985619	4981.73	32.1991	410.229	52.3361	2179.7	113.682
25-03_Line2_23		bd	184.009	162.988	427.189	104.936	896.811	0.11701	0.00228541	0.000440345	0.00376331	4.55443	7.15548	0.92377	5.35579	27.9535	8.93786	0.219566	7.15548	0.800581	5125.7	151.211	1279.58	163.988	3417.46	161.658
25-03_Line2_24		bd	204.747	153.769	388.454	11.8802	928.79	0.012791	0.00220506	4.9853e-05	0.0038975	4.46637	5.98081	0.707577	5.43452	21.8336	8.0811	0.223895	5.98081	0.740099	4746.18	156.066	1302.42	139.541	3176.35	145.916
25-03_Line2_25		bd	208.494	192.755	415.874	15.4819	695.397	0.0222634	0.00241216	6.49669e-05	0.00291811	3.41741	5.946	1.02198	6.95957	41.2146	9.15372	0.29262	5.946	0.649572	5267.9	195.346	1654.61	171.248	3800.34	166.974
25-03_Line2_26		bd	457.562	378.241	977.198	138.547	554.823	0.249714	0.005352	0.000581389	0.00232822	1.27167	7.19853	0.873116	4.9107	94.6243	8.714	0.786366	7.19853	0.826088	5045.95	139.117	3740.1	396.127	4630.58	161.549
25-03_Line2_28		bd	811.109	750.186	1778.03	48.5606	740.859	0.0655463	0.00985773	0.000203776	0.00310888	0.907287	5.98822	0.90933	2.78467	138.128	6.60402	1.10219	5.98822	0.906753	5103.45	78.6941	4789.55	392.589	5011.32	125.114
25-03_Line2_31		bd	506.532	455.452	1183.56	33.7552	705.882	0.0478199	0.00633366	0.000141648	0.00296211	1.38174	6.61517	0.855514	3.8282	85.3312	7.643	0.723727	6.61517	0.865519	5017.09	108.586	3510	348.5	4526.77	142.873
25-03_Line2_32		bd	52.0733	56.1637	93.8	60.4914	181.803	0.33273	0.000596416	0.000253841	0.000762904	3.17946	16.7987	0.830342	34.2291	35.9923	38.1291	0.314519	16.7987	0.440575	4974.69	972.714	1762.91	498.433	3666.25	563.553
25-03_Line2_33		bd	318.716	241.739	610.233	42.8228	541.49	0.0790833	0.00345589	0.000179698	0.00227227	1.61334	6.63994	0.807953	4.66107	69.0187	8.11261	0.619834	6.63994	0.818472	4935.82	132.686	3109.26	319.528	4314.12	150.646
25-03_Line3_21	hit matrix	bd	21908370	18814320	49175990	25097.3	324752	0.0772812	250.941	0.0989971	1.281	0.0139669	1.79776	0.856937	0.454718	8455.82	1.85438	71.598	1.79776	0.969469	5019.44	12.8967	27622.5	224.63	9181.83	36.9722
25-03_Line3_01	open system trend	bd	7662.95	4635.51	11304.8	1884.43	578491	0.00325749	0.0658857	0.0074332	2.28188	62.2358	4.32094	0.557117	3.74568	1.23371	5.71845	0.0160679	4.32094	0.755614	4399.95	109.466	102.757	8.80373	816.025	62.195
25-03_Line3_02	open system trend	1908.41	39297.2	30529.9	77433.8	2177.01	810107	0.0026873	0.411061	0.00858728	3.1955	19.3986	2.44656	0.77432	0.76139	5.50118	2.5623	0.0515502	2.44656	0.95483	4875.22	21.734	324.032	15.4449	1900.78	43.1026
25-03_Line3_03	open system trend	350.827	12699.6	4469.45	10290.2	765.089	930797	0.000821971	0.0766492	0.00301792	3.67156	69.1428	1.76284	0.346573	1.51893	0.690803	2.32696	0.0144628	1.76284	0.757572	3692	46.328	92.5656	3.23944	533.283	19.1255
25-03_Line3_04	open system trend	bd	18538.1	2202.97	3717.58	3154.92	1553593	0.00203072	0.0682735	0.0124447	6.12821	78.0049	1.40393	0.118375	1.18998	0.209143	1.8404	0.0128197	1.40393	0.762841	1931.84	42.616	82.1159	2.29067	192.834	6.44406
25-03_Line3_05		bd	22213.4	3195.87	5882.68	5283.52	1538561	0.00343407	0.0873476	0.020841	6.06891	64.8858	1.26971	0.144922	0.907143	0.307815	1.56047	0.0154117	1.26971	0.81367	2286.85	31.2175	98.5923	2.48414	272.486	7.43138
25-03_Line3_06		bd	17698.3	2758.17	5293.97	3233.76	1225764	0.00263816	0.0718793	0.0127557	4.83507	64.7994	1.26764	0.154909	1.28461	0.329467	1.80476	0.0154322	1.26764	0.70239	2400.84	43.6837	98.7228	2.48336	289.159	9.04229
25-03_Line3_07		bd	3384.73	341.387	523.646	61.5386	253093	0.000243146	0.0118627	0.000242741	0.998333	69.4332	1.69981	0.0976784	3.24346	0.193882	3.66188	0.0144023	1.69981	0.464191	1580.27	121.353	92.1812	3.11076	179.936	12.0052
25-03_Line3_08		bd	7315.32	1605.14	3380.4	43.4427	452566	9.59918e-05	0.0343364	0.000171361	1.78516	57.7559	1.45809	0.221562	1.65321	0.528695	2.20434	0.0173142	1.45809	0.661462	2992.08	53.1857	110.659	3.19869	430.943	15.365
25-03_Line3_09		bd	2853.02	588.217	1217.87	39.6826	162881	0.00024363	0.0130053	0.00015653	0.64249	57.7794	2.29876	0.197875	3.44791	0.47198	4.14396	0.0173072	2.29876	0.554726	2808.75	112.723	110.615	5.0402	392.556	26.6311
25-03_Line3_10		349.308	14935.3	4913.26	11395.2	59.5239	768346	7.74702e-05	0.0872132	0.000234794	3.03077	47.8694	1.42388	0.327524	0.879137	0.942954	1.67341	0.0208902	1.42388	0.850882	3605.53	26.9739	133.279	3.75541	674.427	16.3602
25-03_Line3_16		bd	9606.07	2186.17	4587.86	10	619484	1.61425e-05	0.0457231	3.94454e-05	2.44358	59.2755	1.72173	0.228533	1.40114	0.531348	2.2198	0.0168704	1.72173	0.775621	3041.8	44.8872	107.846	3.68169	432.704	15.5223
25-03_Line3_17		bd	11700.5	2649.23	5759.45	20.6349	751795	2.74476e-05	0.0561323	8.13953e-05	2.96548	60.185	1.44517	0.223142	1.42694	0.510975	2.03093	0.0166154	1.44517	0.711581	3003.5	45.8619	106.23	3.04453	419.104	13.8526
25-03_Line3_18		bd	6740.07	1542.28	3726.25	18.3333	444080	4.12838e-05	0.0335206	7.23166e-05	1.75169	61.2617	2.26292	0.228217	3.52319	0.513411	4.18732	0.0163234	2.26292	0.540422	3039.59	112.891	104.378	4.68424	420.74	28.4451
25-03_Line3_19		624.911	12544.1	9253.26	21948	6966.87	173198	0.040225	0.12211	0.0274811	0.683184	13.3463	10.3494	0.675004	1.88931	6.97031	10.5204	0.0749273	10.3494	0.983742	4678.4	54.4341	465.773	92.344	2107.65	171.505
25-03_Line3_20		bd	4523.62	1306.53	2354.29	1010.96	254967	0.00396506	0.0228459	0.00398776	1.00573	52.8095	1.6343	0.259805	2.59044	0.678018	3.06289	0.018936	1.6343	0.533581	3245.52	81.6272	120.928	3.91462	525.576	24.8265
25-03_Line4_01	low Pb	bd	31.4015	24.438	59.772	25.8065	130.265	0.198107	0.000322716	0.000101795	0.000513836	3.7301	14.9161	0.669394	40.8086	24.7325	43.4492	0.268089	14.9161	0.3433	4666.38	1176.46	1531.1	394.262	3297.71	616.501
25-03_Line4_02	low Pb	bd	10.1707	11.7297	29.6277	46.6667	279.962	0.16669	0.000143834	0.000184079	0.00110432	26.5852	34.8867	-0.295407	67.7801	-1.53139	76.2314	0.0376149	34.8867	0.457642	#NUM!	#NUM!	238.032	161.026	#VALUE!	#VALUE!
25-03_Line4_03	low Pb	bd	15.0282	14.6364	23.784	37.3016	201.967	0.184692	0.000149195	0.000147138	0.000796666	9.64533	26.3498	-0.15981	74.8452	-2.28345	79.3481	0.103677	26.3498	0.332078	#NUM!	#NUM!	635.922	311.481	#VALUE!	#VALUE!
25-03_Line4_05	low Pb	bd	45.7605	45.3789	70.0692	17.7419	5634.65	0.00314872	0.000449994	6.99838e-05	0.0222261	101.458	11.5293	1.07748	18.7306	1.46362	21.9945	0.00985625	11.5293	0.524189	5342.01	524.197	63.2264	14.4915	915.5	235.743
25-03_Line4_04		bd	574.274	477.378	1231.67	27.3438	36695.2	0.000745159	0.00637363	0.000107859	0.144746	51.4734	5.08095	0.838827	3.2868	2.24593	6.05137	0.0194275	5.08095	0.839636	4989.13	93.3439	124.037	12.4719	1195.51	81.6565
25-03_Line4_06		bd	681.26	77.9798	120.239	291.805	54429.5	0.00536115	0.00245496	0.00115103	0.214699	71.0803	2.42099	0.112479	5.64521	0.218086	6.14244	0.0140686	2.42099	0.394142	1839.85	204.411	90.0599	4.32891	200.316	22.0911
25-03_Line4_07		bd	5704.1	2659.83	6378.82	2497.02	240895	0.0103656	0.0411526	0.0098496	0.950221	37.119	3.18812	0.470302	2.53692	1.74617	4.07432	0.0269404	3.18812	0.782491	4150.72	75.179	171.371	10.774	1025.75	51.293
25-03_Line4_08		653.802	15232.4	12034.7	30955.8	3141.69	128941	0.0243654	0.162522	0.0123925	0.508611	7.90497	1.55484	0.789063	0.712778	13.7568	1.71043	0.126503	1.55484	0.909033	4902.12	20.3214	767.883	22.4721	2733.11	31.8754
25-03_Line4_09		22549	421427	358488	918731	9556.17	390566	0.0244675	4.74157	0.0376947	1.5406	0.873685	1.48373	0.844719	0.43303	133.249	1.54563	1.14458	1.48373	0.959952	4999.07	12.2925	4918.24	101.295	4975.07	30.6859
25-03_Line4_10		3309.93	65227.9	53555.5	138150	2184.99	466481	0.00468399	0.717199	0.00861879	1.84005	7.05763	3.05191	0.814837	0.649403	15.9117	3.12024	0.141691	3.05191	0.978102	4947.89	18.4765	854.215	48.6489	2871.51	57.9333
25-03_Line4_11		bd	4026.76	2270.39	5546.19	239.064	978922	0.000244211	0.0330593	0.000942995	3.86139	217.638	3.57372	0.526442	3.68077	0.333365	5.13026	0.00459478	3.57372	0.696596	4317.01	108.055	29.552	2.10703	292.132	25.7193
25-03_Line4_12		330.337	8349.86	5832.23	15211.2	439.234	373878	0.00117481	0.0820477	0.00173258	1.47478	41.5089	7.25459	0.618892	3.18803	2.05484	7.92418	0.0240912	7.25459	0.9155	4552.99	92.4281	153.461	21.9655	1133.91	102.854
25-03_Line4_13		bd	11454.4	4787.56	12132.1	2450.1	763733	0.00320805	0.0792028	0.0096645	3.01257	63.1139	2.40105	0.417108	2.30969	0.910815	3.33162	0.0158444	2.40105	0.720686	3971.93	69.1823	101.339	4.82653	657.491	31.7483
25-03_Line4_14		4293.38	81847.7	70195.7	175083	2363.93	123616	0.0191233	0.913133	0.00932462	0.487606	1.37929	1.93607	0.842919	0.522833	84.224	2.00542	0.72501	1.93607	0.965417	4996.04	14.8438	3514.8	104.066	4513.67	39.4703
25-03_Line4_15		2322.39	43665	34870.8	89437.9	1915.45	718364	0.0026664	0.468878	0.00755555	2.83361	13.2342	5.90544	0.807672	0.603204	8.41088	5.93617	0.0755615	5.90544	0.994824	4935.33	17.1718	469.575	53.2685	2276.35	102.399
25-03_Line4_20		9311.92	174488	148367	379898	918.562	654274	0.00140394	1.96165	0.0036233	2.58081	3.21655	4.58269	0.848737	0.574746	36.3654	4.61859	0.310892	4.58269	0.992227	5005.81	16.3106	1745.09	138.622	3676.44	87.4099
25-03_Line4_21		5097.9	96116.6	80390.4	206559	1551.58	283414	0.00547459	1.06928	0.00612026	1.11794	2.79833	5.06295	0.836715	0.487095	41.2083	5.08633	0.357356	5.06295	0.995404	4985.55	13.8355	1969.63	169.603	3800.19	96.1452
25-03_Line4_22		32468.3	570754	507047	1246289	1715.92	487870	0.00351717	6.48741	0.00676851	1.92442	0.81454	6.46419	0.849225	0.673039	143.687	6.49914	1.22769	6.46419	0.994623	5006.62	19.0994	5163.34	443.675	5051.09	123.275
25-03_Line4_23		325.5	8065.82	5359.12	12855.9	425.784	191007	0.00222916	0.0733599	0.00167952	0.753434	22.6625	3.73856	0.639025	3.3915	3.88612	5.04768	0.0441258	3.73856	0.740649	4599.34	98.0972	278.356	20.3379	1610.8	78.4197
25-03_Line4_24		bd	1761.46	1410.41	3606.8	145.238	6725.99	0.0215936	0.0189218	0.000572899	0.0265309	3.63895	5.13038	0.872666	5.37109	33.0505	7.42761	0.274805	5.13038	0.690717	5045.22	152.165	1565.14	141.032	3582.11	136.769
25-03_Line4_25		bd	723.772	731.077	1503.62	98.3873	3086.24	0.0318794	0.00825822	0.000388093	0.0121738	4.1152	8.4416	1.16701	9.38644	39.0833	12.624	0.243002	8.4416	0.668693	5453.47	261.566	1402.28	209.334	3747.74	223.47
25-03_Line4_26		bd	971.418	745.646	1523.83	152.42	5420.39	0.0281197	0.00904657	0.000601226	0.0213809	5.1123	5.09621	0.86895	5.85606	23.4253	7.76304	0.195607	5.09621	0.656471	5039.18	165.947	1151.68	106.609	3244.78	140.944
25-03_Line4_27		383.238	10840.8	6930.47	16619.3	2987.45	350038	0.00853463	0.095997	0.0117841	1.38074	30.3607	2.2485	0.619888	1.36007	2.81389	2.62784	0.0329373	2.2485	0.855646	4555.32	39.4267	208.906	9.23728	1359.24	38.6287
25-03_Line4_28		4042.38	74858.2	60479.5	155554	2287.62	383867	0.00595941	0.81199	0.00902361	1.51418	4.26378	4.70789	0.827789	0.546714	26.7566	4.73953	0.234534	4.70789	0.993325	4970.32	15.5394	1358.22	114.294	3374.6	88.7839
25-03_Line4_29		4702.22	83629.4	69925.4	181673	1511.76	257134	0.00587924	0.935747	0.00596318	1.01428	2.84536	5.57117	0.830039	0.539128	40.2038	5.59719	0.351449	5.57117	0.99535	4974.17	15.3211	1941.51	184.136	3775.73	105.258
25-03_Line4_30		4383.9	83765.5	70088.2	147976	872.235	330029	0.0026429	0.842521	0.00344056	1.30181	3.00808	12.2412	0.821047	1.23957	37.617	12.3038	0.332438	12.2412	0.994912	4958.69	35.2508	1850.19	382.206	3709.9	218.178
25-03_Line4_31		2016.79	38264.6	27525	71601.1	698.445	459884	0.00151874	0.38351	0.00275504	1.81403	12.8568	4.89352	0.705227	1.62072	7.55965	5.15493	0.0777798	4.89352	0.94929	4741.41	46.5539	482.857	45.3709	2180.09	88.4847
25-03_Line4_32		9932.46	194762	158274	408809	2242.82	778990	0.00287914	2.1266	0.0088469	3.07275	3.65093	4.11874	0.814215	0.553912	30.7356	4.15582	0.273903	4.11874	0.991078	4946.81	15.7604	1560.58	113.176	3510.62	78.6125
25-03_Line4_33		19521.8	307263	255540	634843	1500.83	786887	0.0019073	3.34309	0.00592008	3.10391	1.89301	9.43433	0.82546	0.509547	60.0964	9.44808	0.528259	9.43433	0.998545	4966.31	14.4855	2734.11	407.302	4175.72	173.098
25-03_Line4_34		30950.7	586155	492726	1275525	2539.79	597486	0.00425079	6.57204	0.0100183	2.35681	0.994083	2.97531	0.840033	0.454765	116.461	3.00986	1.00595	2.97531	0.98852	4991.17	12.914	4487.47	189.555	4839.42	58.8632
25-03_Line4_35		1847.47	44447.3	29822.6	76434.4	1533.37	807892	0.00189799	0.420673	0.00604844	3.18676	15.1166	7.0488	0.671286	2.0789	6.12011	7.34897	0.0661524	7.0488	0.959154	4670.45	59.92	412.933	56.1432	1993.12	120.801
25-03_Line4_36		4678.38	95635.3	74359.9	186230	1881.31	903144	0.00208307	0.994358	0.0074209	3.56248	8.2	12.0828	0.697186	2.13333	11.7176	12.2696	0.121951	12.0828	0.984768	4724.93	61.3266	741.784	167.141	2582.11	206.972
25-03_Line4_37		633.753	14973.4	9852.71	24198.4	1584.17	384460	0.00412051	0.136846	0.00624881	1.51651	25.6511	2.98477	0.620788	2.44993	3.33536	3.86148	0.0389846	2.98477	0.77296	4557.42	71.0129	246.536	14.4231	1489.37	58.6054
25-03_Line4_38		1457.87	19593.9	9194.98	21660.5	959.39	859561	0.00111614	0.140823	0.00378435	3.39057	45.1267	2.40673	0.545019	3.56681	1.6645	4.30284	0.0221598	2.40673	0.559334	4367.84	104.419	141.292	6.72351	995.092	53.1696
25-03_Line4_39		747.639	26585.9	14566.9	35458.6	3087.07	794378	0.00388615	0.213851	0.0121771	3.13345	30.2173	4.75841	0.497058	3.02342	2.26703	5.63768	0.0330936	4.75841	0.844036	4232.51	89.1763	209.881	19.6224	1202.09	76.4899
25-03_Line4_40		1283.85	29413.7	21077.5	54094.6	2137.38	402258	0.00531345	0.291938	0.00843097	1.58672	12.8167	3.35101	0.720567	0.988162	7.74825	3.49367	0.0780231	3.35101	0.959166	4772.29	28.3425	484.312	31.1937	2202.22	60.9705
25-03_Line4_41		319.224	10254.3	4264.38	10565.8	189.286	485456	0.000389915	0.0700201	0.000746647	1.9149	43.9688	2.09262	0.417116	1.35552	1.30743	2.49329	0.0227434	2.09262	0.839301	3971.95	40.602	144.971	5.99687	848.996	28.2916
25-03_Line4_42		bd	8375.28	3825.63	8751.35	117.742	360078	0.000326991	0.0584857	0.000464439	1.42034	40.7041	2.70776	0.42592	2.75246	1.4421	3.86109	0.0245676	2.70776	0.701295	4003.21	82.2866	156.459	8.36562	906.595	45.2776
25-03_Line4_43		bd	2552.43	888.823	2172.9	128.302	128686	0.000997017	0.0156712	0.000506093	0.507607	47.489	2.33204	0.353562	3.13163	1.02607	3.90455	0.0210575	2.33204	0.597261	3722.42	95.3207	134.336	6.19772	716.962	39.3827
25-03_Line4_44		bd	4870.86	2363.82	5859.97	235.157	265303	0.000886373	0.0365521	0.000927587	1.0465	51.7823	3.64696	0.493157	2.4843	1.31253	4.41272	0.0193116	3.64696	0.826466	4220.88	73.3233	123.304	8.90208	851.239	49.6286
25-03_Line4_45		bd	6211.41	3412.89	8839.81	140.477	167032	0.000841018	0.0515403	0.000554115	0.658863	25.0729	2.29195	0.566484	1.44424	3.11379	2.70903	0.0398837	2.29195	0.84604	4424.3	42.1526	252.112	11.3236	1436.1	40.8099
25-03_Line4_46		330.16	9609.01	6066.85	15329.5	221.539	263353	0.000841227	0.0865478	0.00087387	1.0388	25.6245	3.55497	0.629198	1.14696	3.38406	3.73542	0.0390251	3.55497	0.951693	4576.92	33.2128	246.787	17.1919	1500.71	56.9285
25-03_Line4_47		bd	2821.23	2027.8	4855.29	300.795	48117.7	0.00625124	0.0270884	0.0011865	0.189802	12.5293	5.89081	0.715484	2.11296	7.87005	6.25829	0.0798126	5.89081	0.94128	4762.13	60.6331	495.004	55.8936	2216.26	106.93
25-03_Line4_48		bd	582.548	484.167	1235.92	65.8731	2486.41	0.0264932	0.00642753	0.000259839	0.00980775	3.86892	3.45278	0.839304	2.91128	29.8975	4.51633	0.25847	3.45278	0.76451	4989.94	82.6764	1482.01	90.7867	3483.45	85.0814
25-03_Line4_49		bd	210.023	161.019	398.661	33.8462	1528.59	0.0221421	0.00214853	0.000133508	0.00602957	6.51762	6.18888	0.775298	6.5018	16.394	8.97639	0.15343	6.18888	0.689462	4877.02	185.579	920.163	105.276	2900.06	158.73
25-03_Line4_50		bd	216.7	167.497	418.442	7.25807	856.806	0.00847108	0.00224047	2.86297e-05	0.0033797	4.00847	6.74706	0.928279	6.84457	31.9158	9.61098	0.249472	6.74706	0.702016	5132.57	193.188	1435.75	171.385	3547.7	173.536
25-03_Line4_51		5407.97	100718	86333.3	220651	125	103382	0.00120912	1.13805	0.000493068	0.407792	0.983062	7.70716	0.850829	0.502616	119.28	7.72353	1.01723	7.70716	0.99788	5009.3	14.2615	4523.61	482.558	4863.5	144.721
25-03_Line4_52		bd	3270.59	3081.95	7182.64	28.9063	7968.56	0.00362754	0.0377818	0.000114022	0.0314323	2.18518	6.57585	0.862005	3.1011	54.3662	7.27039	0.457629	6.57585	0.90447	5027.81	87.9213	2429.08	260.826	4075.72	135.518
25-03_Line4_53		bd	199.779	188.177	406.668	136.685	879.016	0.155497	0.0022181	0.000539158	0.00346731	4.18755	9.76645	1.01749	7.24221	33.487	12.1587	0.238803	9.76645	0.80325	5261.72	203.329	1380.47	238.271	3595.05	215.24
25-03_Line4_54		bd	98.667	80.5351	206.412	83.6067	435.946	0.191782	0.00107639	0.00032979	0.0017196	4.3538	11.1132	1.0736	19.4771	33.9844	22.4246	0.229685	11.1132	0.495583	5336.96	545.198	1332.85	262.219	3609.59	367.196
25-03_Line4_55		bd	1434.9	1299.59	3259.12	100.807	800.295	0.125962	0.0167304	0.000397636	0.00315679	0.551892	4.15169	0.886767	2.49256	221.443	4.84246	1.81195	4.15169	0.857352	5067.92	70.546	6664.81	336.004	5487.81	93.4605
25-03_Line4_56		bd	58.2859	39.5752	71.1128	85.484	363.483	0.23518	0.00047167	0.000337195	0.00143377	6.51315	11.6093	0.695409	23.6961	14.7148	26.3872	0.153535	11.6093	0.43996	4721.26	681.309	920.751	196.203	2796.98	407.742
25-03_Region4_01		bd	4859.2	1996.68	4676.16	956.266	359162	0.00266249	0.0294288	0.00381971	1.43464	75.5003	3.59343	0.415362	3.08764	0.758201	4.73775	0.013245	3.59343	0.758467	3965.64	92.5204	84.8222	6.05327	572.972	40.6651
25-03_Region4_02		1646.06	38837.7	31118.1	78982.1	773.667	344956	0.0022428	0.380077	0.00309034	1.3779	7.64462	14.9538	0.595335	4.17492	10.7328	15.5257	0.130811	14.9538	0.963167	4496.66	121.391	792.49	219.254	2500.27	253.864
25-03_Region4_03		bd	7052.87	4399.42	10841.9	214.817	751605	0.000285812	0.0568929	0.000858068	3.00221	103.441	3.37173	0.611469	2.26184	0.814685	4.06011	0.00966739	3.37173	0.830453	4535.49	65.6343	62.0207	4.16094	605.079	36.357
25-03_Region4_04		1646.25	29092.9	22331.9	56731.6	360.973	615173	0.000586782	0.276006	0.00144187	2.45725	10.3395	11.7781	0.764569	1.27372	10.1912	11.8468	0.0967169	11.7781	0.994203	4857.12	36.3886	595.14	132.544	2452.28	198.379
25-03_Region4_05		bd	12056.9	6956.23	17446.3	3537.68	353537	0.0100066	0.0930413	0.014131	1.41217	29.1512	2.02708	0.575715	1.01882	2.72181	2.26871	0.0343039	2.02708	0.893494	4447.87	29.6991	217.429	8.66209	1334.43	33.1463
25-03_Region4_06		754.394	17637.4	12803.7	32878.7	2244.29	263866	0.00850542	0.161587	0.0089646	1.05399	15.07	2.85186	0.726949	0.849858	6.64808	2.9758	0.0663569	2.85186	0.958352	4784.93	24.3611	414.17	22.8397	2065.75	51.2163
25-03_Region4_07		907.119	19793.2	13836.8	34209.3	4017.11	326599	0.0122998	0.17312	0.016046	1.30457	17.1083	1.71181	0.694302	0.743214	5.59305	1.86619	0.0584513	1.71181	0.917276	4718.97	21.3712	366.2	12.1763	1915.03	31.6513
25-03_Region4_08		483.749	12654.6	6838.74	16972.8	3820.57	436712	0.00874848	0.0930584	0.0152609	1.74441	33.1358	3.14827	0.534848	1.75602	2.22453	3.60489	0.0301788	3.14827	0.873334	4340.25	51.4849	191.668	11.8798	1188.8	49.288
25-03_Region4_09		bd	4006.25	1966.75	4805.26	337.895	557768	0.000605799	0.0275052	0.00134969	2.22795	84.2927	8.21664	0.491956	2.06375	0.804344	8.47185	0.0118634	8.21664	0.969876	4217.29	60.9233	76.0264	12.4083	599.276	73.9355
25-03_Region4_10		449.995	7651.03	4863.16	12119.5	522.572	307649	0.0016986	0.0628631	0.00208737	1.22887	31.7391	9.29537	0.544542	3.59796	2.36452	9.96741	0.0315069	9.29537	0.932576	4366.56	105.338	199.973	36.5021	1231.95	133.131
25-03_Region4_11		bd	6666.21	4305.41	10814.4	292.615	276938	0.00105661	0.0555959	0.00116882	1.1062	46.0896	4.75593	0.563514	4.27423	1.68503	6.39436	0.0216969	4.75593	0.743769	4416.63	124.802	138.371	13.0083	1002.89	78.387
25-03_Region4_12		733.286	18201.4	13722	34611.2	1262.53	412158	0.00306323	0.169791	0.00504307	1.64632	23.7662	4.63569	0.736028	0.850557	4.26817	4.71307	0.0420766	4.63569	0.983581	4802.71	24.3608	265.692	24.0875	1687.24	74.7253
25-03_Region4_13		880.943	16446.2	12484.6	31668	3242.02	179249	0.0180867	0.154643	0.01295	0.715993	10.7021	9.55984	0.71918	1.71396	9.26137	9.71227	0.0934398	9.55984	0.984305	4769.52	49.1664	575.849	104.475	2364.2	164.022
25-03_Region4_14		2485.26	49065	39475.2	99988.1	1781.51	413773	0.00430553	0.481108	0.00711609	1.65278	8.13631	4.14539	0.801678	0.562813	13.5793	4.18342	0.122906	4.14539	0.990909	4924.72	16.0295	747.267	58.2344	2720.83	76.1965
25-03_Region4_15		860.692	18293.6	13083.6	31822.2	2297.25	655507	0.00350454	0.161279	0.00917613	2.61836	36.1188	3.76376	0.698467	1.15324	2.66513	3.93647	0.0276864	3.76376	0.956124	4727.57	33.1479	176.052	13.0598	1318.85	56.5265
25-03_Region4_16		bd	2085.46	1090.23	2541.15	750.21	91468.8	0.00820182	0.0145889	0.00299665	0.365363	42.7215	2.68765	0.509306	2.55984	1.643	3.71163	0.0234074	2.68765	0.724114	4268.37	75.3508	149.155	7.92061	986.867	45.8071
25-03_Region4_17		1633.77	33970.8	26439.8	65615.6	1354.01	369582	0.00366362	0.321608	0.00540846	1.47626	11.1273	5.9323	0.74203	1.08638	9.19045	6.03095	0.089869	5.9323	0.983642	4814.34	31.0982	554.762	62.7612	2357.16	104.851
25-03_Region4_18		bd	4193.21	631.854	1102.6	515.854	581779	0.000886684	0.0151269	0.00206053	2.32386	138.443	3.41453	0.151321	2.54238	0.150638	4.25708	0.0072232	3.41453	0.802083	2360.9	86.8121	46.3964	3.15629	142.475	11.2553
25-03_Region4_19		709.121	14816.6	9095.12	23366	2249.51	375278	0.00599426	0.120649	0.00898546	1.49901	26.7166	4.8681	0.63827	1.64619	3.29253	5.1389	0.0374299	4.8681	0.947303	4597.63	47.6192	236.883	22.6051	1479.29	77.0486
25-03_Region4_20		344.996	6480.61	5059.86	12517.3	310.797	139482	0.00222822	0.0613933	0.00124145	0.557149	21.9996	4.38441	0.747383	1.26614	4.68204	4.56357	0.0454554	4.38441	0.960741	4824.63	36.2266	286.56	24.5308	1764.04	73.6298
25-03_Region1_01		1335.65	41252.9	21854.8	52233.6	1646.49	1408795	0.00116872	0.294341	0.00657675	5.6273	32.4819	4.98686	0.501658	3.39933	2.1285	6.03525	0.0307864	4.98686	0.826289	4246.09	100.187	195.468	19.1743	1158.1	80.1385
25-03_Region1_02	outlier	856.565	21258.5	14085.5	33877.7	1115.87	587684	0.00189876	0.176648	0.00445723	2.34745	27.6957	4.06484	0.639716	1.52934	3.18332	4.34302	0.0361067	4.06484	0.935948	4600.9	44.232	228.655	18.2373	1453.12	64.9888
25-03_Region1_03		2858.31	59548.4	45532.6	114391	996.464	964794	0.00103283	0.560073	0.00398028	3.85378	13.9111	6.21087	0.740728	1.67139	7.33842	6.43183	0.071885	6.21087	0.965646	4811.83	47.8498	447.502	53.4796	2153.5	108.897
25-03_Region1_04		5505.16	113258	85313.3	217459	1091.12	1154702	0.000944935	1.06167	0.00435837	4.61235	10.5773	8.63357	0.721099	1.22817	9.39562	8.72049	0.094542	8.63357	0.990033	4773.35	35.2247	582.343	95.436	2377.4	148.629
25-03_Region1_05		1154.49	23293.6	19573.2	50923.9	1644.93	75558.9	0.0217702	0.239345	0.00657052	0.301813	3.38525	4.13021	0.829883	0.618077	33.7856	4.1762	0.295399	4.13021	0.988987	4973.91	17.565	1668.45	120.3	3603.8	79.2
25-03_Region1_06		7969	148869	126566	315615	3387.3	190370	0.0177932	1.50831	0.0135303	0.760416	1.32831	6.55071	0.844367	0.478928	87.6069	6.56819	0.752837	6.55071	0.997338	4998.48	13.5958	3617.96	352.902	4553.19	123.991
25-03_Region1_07		71255.8	1198077	1026749	3480656	1828.25	576256	0.00317263	14.5599	0.00730276	2.3018	0.369128	9.67125	0.848832	0.696837	316.92	9.69633	2.70908	9.67125	0.997414	5005.96	19.7753	8449.86	851.874	5850.44	179.455
25-03_Region1_08		62654.1	1162593	1004895	2541587	2659.99	323714	0.0082171	12.0171	0.0106251	1.29304	0.288681	4.49115	0.856463	0.561288	408.881	4.52609	3.46403	4.49115	0.992281	5018.66	15.9198	9644.17	434.357	6108.41	87.7837
25-03_Region1_09	irregular ablation	1091.2	40134.5	22716.1	44278.7	1201.66	1728906	0.000695042	0.273385	0.00479993	6.90595	43.6295	2.14404	0.532026	4.28622	1.68057	4.79256	0.0229202	2.14404	0.447369	4332.49	125.722	146.086	6.19085	1001.2	59.2548
25-03_Region1_10		1819.97	58059	32623.4	76751.5	835.807	1928298	0.000433443	0.427277	0.00333855	7.70241	33.2782	2.35926	0.537948	2.04838	2.22785	3.12441	0.0300497	2.35926	0.755104	4348.72	60.0289	190.859	8.86762	1189.84	42.8746
25-03_Region1_11		4186.31	93180.3	66781.2	160174	1348.7	1544430	0.00087327	0.816959	0.00538728	6.16908	16.9052	7.60657	0.653442	2.06694	5.32712	7.88239	0.0591534	7.60657	0.965007	4631.58	59.6893	370.475	54.5405	1873.22	126.549
25-03_Region1_12		21511.1	410684	360436	908760	6064.97	296459	0.020458	4.28691	0.0242259	1.18418	0.813167	4.80091	0.854326	0.620723	144.794	4.84087	1.22976	4.80091	0.991745	5015.12	17.6083	5169.34	332.645	5058.83	93.2194
25-03_Region1_13		1642.44	49953	27762.3	66980.3	1584.32	1516432	0.00104477	0.369251	0.00632842	6.05725	30.2584	1.44899	0.547135	1.18543	2.49204	1.87211	0.0330487	1.44899	0.773985	4373.51	34.6929	209.601	5.97371	1269.72	26.7749
25-03_Region1_14		36897.9	699128	591414	1469207	1853.38	1469663	0.00126109	7.04264	0.00740316	5.87043	2.08812	12.1287	0.825488	0.637102	54.4831	12.1454	0.4789	12.1287	0.998623	4966.36	18.1117	2522.47	487.465	4077.86	217.216
25-03_Region1_15		1102.39	43345.8	18521.7	44856	904.061	1789476	0.00050521	0.272349	0.00361119	7.14789	41.8549	1.54194	0.410714	1.50104	1.35238	2.15191	0.0238921	1.54194	0.716547	3948.77	45.0254	152.207	4.63724	868.587	24.8174
25-03_Region1_16		2400.03	66235.8	39952.9	98939.8	1294.15	1563876	0.00082753	0.52347	0.00516938	6.24676	22.2724	4.24718	0.591412	1.92521	3.65957	4.66315	0.0448987	4.24718	0.910797	4487.04	56.0056	283.126	23.4865	1562.6	71.7767
25-03_Region1_17		4511.94	102854	92853.3	236131	1829.03	1334863	0.0013702	1.10201	0.0073059	5.33199	13.0185	2.87512	0.727589	1.13293	7.70247	3.09028	0.0768135	2.87512	0.930375	4786.19	32.4734	477.075	26.3884	2196.89	54.0791
25-03_Region1_18		2036.93	63043.9	38270.9	86447.6	785.805	1728705	0.000454563	0.479153	0.00313883	6.90515	27.0977	3.18038	0.560456	1.85823	2.85046	3.68345	0.0369035	3.18038	0.863423	4408.68	54.2809	233.611	14.5769	1368.93	53.9182
25-03_Region1_19		1291.67	45057.3	20391.9	52178.8	975.962	1650688	0.000591246	0.300176	0.00389839	6.59352	36.3277	2.94269	0.453089	2.68718	1.7189	3.98502	0.0275272	2.94269	0.738439	4095.38	79.8908	175.053	10.1559	1015.62	49.9148
25-03_Region1_20		11813.5	227282	191798	482378	1767.17	404144	0.00437264	2.30044	0.00705881	1.61431	1.82645	5.0044	0.856306	0.835643	64.614	5.07369	0.547509	5.0044	0.986344	5018.4	23.7015	2814.81	224.326	4248.15	96.7093
25-03_Line4_16		766.572	43009.3	12607.9	27614.1	973.453	2467155	0.000394565	0.23233	0.00383982	9.73179	53.4119	1.32819	0.290851	0.935539	0.750478	1.6246	0.0187224	1.32819	0.81755	3422.16	29.0853	119.577	3.14637	568.502	14.0469
25-03_Line4_17		797.891	47367.8	16804.4	39815.2	973.825	2374866	0.000410055	0.290268	0.00384129	9.36775	46.3506	1.38427	0.355912	1.15407	1.05826	1.80224	0.0215747	1.38427	0.768083	3732.5	35.1038	137.6	3.76805	732.966	18.6454
25-03_Line4_18		936.487	38944.3	15926	38019	1415.91	1809558	0.00078246	0.259289	0.00558509	7.13787	40.9732	2.83028	0.421815	2.66738	1.41882	3.88914	0.0244062	2.83028	0.727739	3988.72	79.8139	155.443	8.68787	896.869	45.3016
25-03_Line4_19		419.428	21493.8	7740.99	18398.9	796.104	1163915	0.000683988	0.132964	0.00314026	4.59111	47.8353	3.4674	0.371533	3.42621	1.07042	4.87461	0.0209051	3.4674	0.71132	3797.68	103.768	133.373	9.14767	738.947	49.9314
25-03_Region5_01		479.078	10834.3	7804.97	20416.2	848.663	459721	0.00184604	0.0996662	0.0033899	1.83631	35.5747	5.0669	0.662469	4.77281	2.56643	6.96083	0.0281098	5.0669	0.727916	4651.38	137.695	178.708	17.8364	1291.13	96.9437
25-03_Region5_02		528.702	11555.4	8887.38	17656.3	2082.84	259133	0.00803772	0.0972255	0.00831969	1.03508	23.1792	5.30732	0.611418	3.34787	3.63534	6.27502	0.0431421	5.30732	0.845785	4535.37	97.1494	272.28	28.2377	1557.3	95.3221
25-03_Region5_03		bd	10191.4	5504.08	12602.5	2205.5	369458	0.00596955	0.0722141	0.00880966	1.47577	36.365	4.85779	0.450671	4.48667	1.70798	6.61274	0.027499	4.85779	0.734611	4087.42	133.453	174.876	16.7401	1011.53	81.3513
25-03_Region5_04		313.243	9377.1	5131.24	11432.8	1499.47	316520	0.00473735	0.0661994	0.00598948	1.26431	33.1851	4.35229	0.523829	2.85466	2.17547	5.20495	0.030134	4.35229	0.836182	4309.7	83.8366	191.387	16.3937	1173.23	69.9482
25-03_Region5_05		704.043	13227.1	9059.28	22200.7	1704.16	306187	0.00556577	0.113527	0.00680712	1.22303	22.7823	2.40442	0.662328	0.96226	4.00665	2.58982	0.0438937	2.40442	0.928411	4651.07	27.7615	276.923	13.0216	1635.54	41.2396
25-03_Region5_06		bd	4716.14	2587.04	6669.57	1091.12	170455	0.0064012	0.0356572	0.00435837	0.680867	36.3587	2.83979	0.544209	2.16559	2.06283	3.57131	0.0275037	2.83979	0.79517	4365.67	63.4056	174.906	9.79293	1136.56	47.7073
25-03_Region5_07		396.89	11821.3	8355.37	21390.6	761.563	272399	0.00279576	0.106076	0.00304199	1.08807	23.3553	2.18679	0.699257	1.06751	4.12626	2.43344	0.0428168	2.18679	0.898642	4729.19	30.6812	270.269	11.5657	1659.52	39.0181
25-03_Region5_08		462.418	13092	9049.2	22045.6	1473.31	247558	0.00595137	0.112761	0.00588501	0.988849	19.0727	3.13511	0.68692	1.11566	4.96365	3.3277	0.0524311	3.13511	0.942124	4703.6	32.1048	329.43	20.1057	1813.15	54.7436
25-03_Region5_09		bd	5210.9	3149.61	7829.55	417.896	186478	0.00224099	0.0413156	0.00166925	0.744869	36.3807	2.56813	0.593217	1.88968	2.24723	3.18845	0.0274871	2.56813	0.805449	4491.47	54.9594	174.801	8.85155	1195.92	43.8493
25-03_Region5_10		bd	6991.55	3925.53	9350.65	855.796	215440	0.00397232	0.0517215	0.0034184	0.860553	31.0959	2.83702	0.537788	1.96776	2.38349	3.45264	0.0321585	2.83702	0.821694	4348.28	57.6677	204.044	11.3861	1237.66	48.2287
25-03_Region5_11		674.005	15568.9	11401	29427.2	2088.57	292987	0.00712854	0.14392	0.0083426	1.17031	18.4642	2.05121	0.71903	1.03677	5.36689	2.29834	0.0541589	2.05121	0.892476	4769.23	29.741	340.004	13.5726	1879.59	38.6001
25-03_Region5_12		1484.83	28154.6	22993.5	57269.4	2127.53	295229	0.00720637	0.276672	0.00849823	1.17927	10.395	7.01992	0.788131	0.969763	10.4492	7.08659	0.0962004	7.01992	0.990592	4900.44	27.6503	592.103	78.9415	2475.42	123.516
25-03_Region5_13		2748.73	52761.1	44315.8	112122	841.111	453900	0.00185307	0.533857	0.00335974	1.81306	9.27514	7.76636	0.802101	0.682799	11.9183	7.79631	0.107815	7.76636	0.996158	4925.47	19.4462	660.046	96.7198	2598.01	136.473
25-03_Region5_14		1039.32	20595.7	14730.2	37157.2	415.589	623164	0.000666901	0.18497	0.00166003	2.48917	29.1513	12.4325	0.635771	2.63353	3.00572	12.7084	0.0343038	12.4325	0.978293	4591.96	76.2015	217.428	52.9439	1409.07	177.24
25-03_Region5_15	outlier	bd	4226.77	2307.47	5281.37	251.706	512356	0.000491271	0.0301524	0.00100541	2.04656	118.909	5.26272	0.553004	3.26418	0.640941	6.19283	0.00840977	5.26272	0.849809	4389.12	95.45	53.9862	5.65607	502.889	47.9705
25-03_Region5_16		361.433	10509.2	6424.1	16615.2	744.217	328536	0.00226525	0.0856128	0.00297271	1.31231	31.3628	3.50525	0.647225	1.26799	2.84411	3.72754	0.0318849	3.50525	0.940365	4617.77	36.6422	202.335	13.9493	1367.26	54.5158
25-03_Region5_17		535.684	12543	9106.1	22106.4	577.049	320663	0.00179955	0.11166	0.00230497	1.28086	26.5681	6.80949	0.689901	1.54625	3.57876	6.98284	0.0376391	6.80949	0.975175	4709.83	44.4823	238.183	31.7677	1544.83	105.193
25-03_Region5_18		316.354	8764.21	5555.66	13715.5	247.194	218870	0.00112941	0.0715438	0.000987394	0.874256	22.7484	7.36284	0.707362	1.757	4.28546	7.56958	0.0439592	7.36284	0.972689	4745.75	50.4578	277.327	39.849	1690.57	117.561
25-03_Region5_19		526.037	10691.4	7868.11	18860.4	1293.42	380734	0.00339717	0.0954923	0.00516643	1.52081	31.9037	6.78595	0.741469	2.37644	3.20301	7.19003	0.0313443	6.78595	0.9438	4813.26	68.03	198.956	26.535	1457.89	105.587
25-03_Region5_20	outlier	313.35	7410.7	4433.49	10429.7	196.447	929818	0.000211275	0.0568411	0.000784691	3.71407	113.529	10.4259	0.611677	3.02261	0.742546	10.8552	0.00880836	10.4259	0.960451	4535.98	87.7081	56.5337	11.7261	563.89	89.8426
25-03_Line3_11		328.187	45625.1	6588.42	11506.4	1319.87	3248212	0.000406337	0.177866	0.00520627	12.8127	65.9175	1.2664	0.142037	0.9525	0.296967	1.58462	0.0151705	1.2664	0.799181	2252.19	32.9001	97.0608	2.43947	264.028	7.34164
25-03_Line3_12		bd	23170.8	4129.99	7897.14	252.421	1555764	0.000162249	0.0982507	0.000995682	6.13677	62.125	1.25148	0.176459	0.885902	0.391457	1.5333	0.0160966	1.25148	0.816197	2619.87	29.4771	102.939	2.55554	335.433	8.72237
25-03_Line3_13		bd	9903.7	2229.5	4835.44	34.127	600978	5.67858e-05	0.0473659	0.000134615	2.37058	56.7809	1.35737	0.228958	1.18173	0.555725	1.79971	0.0176116	1.35737	0.754218	3044.78	37.8487	112.543	3.02803	448.74	12.9721
25-03_Line3_14		bd	13260	2314.28	4858.38	603.232	864360	0.000697894	0.0570353	0.00237947	3.4095	60.578	1.36168	0.173902	1.2266	0.395635	1.83268	0.0165077	1.36168	0.742999	2595.55	40.9089	105.546	2.85037	338.478	10.496
25-03_Line3_15		bd	12578.8	2317.34	4767.51	71.8751	822569	8.73789e-05	0.0548888	0.000283514	3.24465	60.5852	1.31019	0.18216	1.32349	0.414375	1.86232	0.0165057	1.31019	0.703529	2672.64	43.8164	105.534	2.7423	352.021	11.02
25-03_Region2_01		bd	6442.64	1053.29	1890.09	54.1194	404158	0.000133907	0.0239523	0.000216175	1.61437	61.7217	1.25356	0.159004	1.80715	0.355038	2.19936	0.0162017	1.25356	0.569966	2445.09	61.1757	103.606	2.57626	308.503	11.6356
25-03_Region2_02		bd	10449.4	1813.1	3536.83	215.851	673758	0.000320369	0.0403185	0.000862195	2.69126	63.619	1.16354	0.1755	1.08607	0.380187	1.59166	0.0157186	1.16354	0.731024	2610.8	36.169	100.54	2.32109	327.176	8.86488
25-03_Region2_03		bd	19382.3	3177.14	5773.19	2319.99	1225117	0.00189369	0.0723024	0.00926699	4.89362	62.3197	1.28575	0.163891	1.19222	0.362441	1.75343	0.0160463	1.28575	0.733275	2496.21	40.1521	102.62	2.61745	314.035	9.42868
25-03_Region2_04		bd	8768.17	1484.65	2912.5	1266.86	540940	0.00234196	0.0335968	0.00506035	2.16073	61.0548	1.44097	0.169514	2.76806	0.382641	3.12066	0.0163787	1.44097	0.46175	2552.85	92.7037	104.729	2.99313	328.98	17.3886
25-03_Region2_05		bd	12610.8	2249.29	4446.18	150.226	793683	0.000189277	0.0492678	0.000600063	3.17029	63.4585	1.11857	0.177666	1.1452	0.385853	1.60084	0.0157583	1.11857	0.69874	2631.21	38.0635	100.793	2.23695	331.335	9.01121
25-03_Region2_06		bd	12189.2	2292.38	4540.6	254.736	750870	0.000339254	0.0485429	0.00101752	2.99928	61.558	1.11895	0.18673	1.01639	0.418057	1.51166	0.0162449	1.11895	0.740214	2713.57	33.5207	103.88	2.30568	354.66	9.01003
25-03_Region2_07	outlier	bd	10029.9	2368.89	5039.45	122.917	688933	0.000178416	0.0445008	0.00049098	2.75188	67.1023	1.70455	0.22909	1.69135	0.470517	2.40128	0.0149026	1.70455	0.709849	3045.7	54.1669	95.3597	3.22617	391.546	15.4844
25-03_Region2_08		bd	9883.18	2181.61	4593.86	50.947	576032	8.84448e-05	0.0425114	0.000203503	2.30091	58.7455	1.24744	0.221924	1.39557	0.520637	1.87183	0.0170226	1.24744	0.66643	2994.7	44.8873	108.811	2.69137	425.577	12.932
25-03_Region2_09		bd	6282.29	1423.87	2987.35	35.3694	359451	9.83982e-05	0.0272889	0.00014128	1.43579	57.788	1.38167	0.232828	2.0364	0.55527	2.46088	0.0173046	1.38167	0.561454	3071.59	65.0767	110.599	3.02945	448.443	17.6873
25-03_Region2_10		bd	7242.77	1412.15	2740.4	20.644	440382	4.68773e-05	0.0290799	8.24604e-05	1.75907	60.5107	1.16294	0.19135	1.25974	0.435814	1.71446	0.016526	1.16294	0.678314	2753.8	41.3917	105.663	2.4371	367.297	10.5133
25-03_Region2_11		338.533	32971.8	6325.17	12400.1	749.441	2114165	0.000354485	0.131926	0.00299357	8.44483	63.1927	1.64932	0.174829	3.11823	0.381288	3.52755	0.0158246	1.64932	0.467553	2604.42	103.909	101.213	3.31173	327.985	19.5842
25-03_Region2_12		bd	18432.4	3117.59	6132.41	216.356	1165414	0.000185647	0.070643	0.000864213	4.65514	64.2799	1.07995	0.169686	0.993488	0.363811	1.46742	0.015557	1.07995	0.735953	2554.55	33.2669	99.5145	2.13255	315.056	7.91846
25-03_Region2_13		bd	11189.2	2911.53	6443.22	1196.47	609367	0.00196347	0.0524264	0.0047792	2.43406	55.2549	2.92529	0.2571	5.27296	0.641264	6.03005	0.0180979	2.92529	0.48512	3229.02	166.372	115.624	6.70088	503.088	46.7522
25-03_Region2_14	outlier	bd	7499.18	1772.79	3737.42	83.9908	481618	0.000174393	0.0331988	0.000335493	1.92378	63.5983	1.19913	0.237866	1.49556	0.515457	1.91692	0.0157237	1.19913	0.625548	3105.75	47.6584	100.573	2.39283	422.112	13.1552
25-03_Region2_15	outlier	802.173	27577	14584.3	35883.7	130.775	809554	0.00016154	0.199164	0.000522371	3.23369	26.1758	7.9771	0.418014	6.82872	2.20088	10.5007	0.0382032	7.9771	0.75967	3975.17	204.501	241.686	37.7345	1181.32	136.958
25-03_Region2_16		bd	14146.3	3109.95	6715.59	1783.58	790049	0.00225755	0.0611741	0.00712432	3.15578	58.7911	2.21888	0.235415	4.24655	0.55186	4.79131	0.0170094	2.21888	0.463106	3089.23	135.508	108.727	4.78283	446.214	34.0246
-25_05_02	low Pb	bd	44.4261	36.0685	164.63	150	575.091	0.260829	0.0011764	0.000879625	0.00337242	12.2344	17.0997	0.490476	35.7676	5.52509	39.645	0.0817364	17.0997	0.431321	4212.84	1056.15	506.479	164.467	1904.51	521.553
-25_05_04	low Pb	bd	23.0926	23.3374	84.3407	52.9412	85.648	0.618126	0.000627591	0.000310455	0.000502253	2.13925	26.3977	0.698229	30.9638	44.9822	40.689	0.467452	26.3977	0.648767	4727.08	890.018	2472.38	1002.06	3887.15	594.616
-25_05_05	low Pb	bd	47.6079	56.8518	149.4	89.3941	4605.87	0.0194087	0.00121832	0.00052422	0.0270095	94.0582	17.5759	0.760921	21.8499	1.11493	28.0416	0.0106317	17.5759	0.626779	4850.29	624.422	68.1747	23.7943	760.545	263
-25_05_11	low Pb	bd	22.2364	23.1374	55.7718	54.8078	40.8244	1.34253	0.000485415	0.000321401	0.0002394	1.63635	27.4594	0.694534	27.868	58.4957	39.1234	0.611117	27.4594	0.701866	4719.45	801.327	3074.47	1219.83	4148.76	579.371
-25_05_12	low Pb	bd	45.3681	27.7885	71.6588	104.651	100.759	1.03863	0.000694995	0.000613691	0.000590867	2.39949	23.2207	0.575461	55.3431	33.0524	60.0172	0.416755	23.2207	0.386901	4447.23	1613.33	2245.73	825.48	3582.17	784.346
-25_05_14	low Pb	bd	0.737313	13.7825	37.1763	27.8689	25.8576	1.07778	0.000248098	0.000163427	0.000151633	6.15689	169.139	0.509096	60.9577	11.3958	179.789	0.16242	169.139	0.940768	4267.77	1794.4	970.209	2495.22	2556.08	1482.4
-25_05_16	low Pb	bd	6.93909	-1.61685	7.6678	14.5161	24.8495	0.584162	6.23415e-05	8.51248e-05	0.000145721	2.0388	46.5714	0.271791	55.2711	18.3724	72.2758	0.490484	46.5714	0.644356	3316.39	1732.1	2572.77	1723.52	3009.44	876.549
-25_05_17	low Pb	bd	31.5765	25.3954	55.2093	34.4263	40.7496	0.844824	0.000538377	0.000201881	0.000238962	1.43507	31.4238	0.45436	35.3475	43.6348	47.2959	0.696831	31.4238	0.664409	4099.54	1050.63	3408.62	1480.08	3856.95	664.856
-25_05_18	low Pb	bd	67.7595	49.5782	152.342	160.834	234.485	0.685903	0.00129424	0.000943153	0.00137505	3.11021	11.6899	0.881238	16.5385	39.0489	20.2528	0.321521	11.6899	0.577198	5059.07	468.261	1797.15	356.636	3746.87	337.973
-25_05_19	low U	bd	84.3444	72.6376	184.842	25	45.2124	0.552946	0.00164047	0.000146604	0.000265132	0.467135	15.4461	0.632046	18.0359	186.472	23.7461	2.14071	15.4461	0.65047	4583.45	522.096	7377.59	1231.81	5314.14	392.838
-25_05_20	low Pb	bd	31.0389	14.8834	44.8007	37.705	38.3576	0.982986	0.000435395	0.000221107	0.000224935	1.26153	33.6503	0.161567	95.5888	17.6507	101.339	0.792691	33.6503	0.332057	2472.13	3227.07	3762.89	1679.34	2970.89	1087.41
-25_05_22	low Pb	bd	15.985	11.0738	38.4513	12.5	21.984	0.568597	0.000314395	7.33019e-05	0.000128917	1.40444	40.8258	-0.219493	81.6933	-21.5389	91.3266	0.712027	40.8258	0.447031	#NUM!	#NUM!	3466.09	1884.68	#VALUE!	#VALUE!
-25_05_25	low Pb	bd	22.9743	17.8914	97.8327	124.591	137.743	0.904512	0.000665638	0.000730617	0.000807747	5.75342	33.1957	0.412805	44.0496	9.88838	55.1572	0.17381	33.1957	0.601838	3956.39	1320.69	1033.07	604.485	2424.43	704.739
-25_05_27	low U	bd	56.8455	54.1375	156.508	9.83607	36.7313	0.267785	0.00128374	5.76802e-05	0.000215397	0.786471	19.5332	0.63762	30.9086	111.734	36.5634	1.2715	19.5332	0.534227	4596.16	894.156	5288.91	1274.89	4797.72	553.486
-25_05_29	low Pb	bd	-7.40214	3.95694	2.76365	31.356	44.5632	0.703629	-3.2709e-06	0.000183876	0.000261325	-8.21509	131.415	0.0024075	4277.45	-0.0403887	4279.46	-0.121727	131.415	0.0307083	#NUM!	#NUM!	-836.732	-2920.19	-41.8611	#VALUE!
-25_05_30	low Pb	bd	47.1856	26.3632	90.0393	84.4264	61.9463	1.3629	0.000785088	0.000495089	0.000363262	1.11088	17.457	-0.161071	219.683	-19.9827	220.376	0.900184	17.457	0.0792146	#NUM!	#NUM!	4138.28	986.714	#VALUE!	#VALUE!
-25_05_31	low Pb	bd	1.92585	6.3631	26.5204	30.4688	25.6725	1.18683	0.000167056	0.000178673	0.000150547	-7.13691	174.656	0.280274	80.1149	-5.41225	192.154	-0.140117	174.656	0.908938	3364.46	2501.49	-973.141	-5428.59	#VALUE!	#VALUE!
-25_05_36	low Pb	bd	51.8156	47.5505	130.62	38.5417	81.4275	0.473325	0.00110374	0.000226014	0.000477503	1.37595	14.6873	0.671881	23.5595	67.2972	27.7627	0.726773	14.6873	0.529031	4671.72	679.009	3521.38	751.442	4288.84	443.11
-25_05_39	low Pb	bd	16.0953	11.8815	39.7832	31.8966	25.5495	1.24842	0.000325192	0.000187046	0.000149826	1.9595	59.3707	0.349251	59.0816	24.5639	83.7587	0.510334	59.3707	0.70883	3703.73	1800.59	2658.06	2174.66	3291.04	973.97
-25_05_40	low Pb	bd	69.8429	42.3333	135.982	167.022	78.7328	2.12138	0.00119095	0.00097944	0.000461701	0.900542	14.2502	0.723455	16.9151	110.717	22.1175	1.11044	14.2502	0.644292	4778.02	485.027	4814.81	900.733	4788.51	369.118
-25_05_41	low Pb	bd	9.09162	20.0136	44.9827	30.7693	51.3076	0.599702	0.000355561	0.000180435	0.000300875	4.09214	66.8416	0.128755	110.349	4.3363	129.014	0.244371	66.8416	0.518094	2081.04	3884.22	1409.38	1502.76	1700.29	1147.74
-25_05_42	low U	bd	63.3214	53.5136	147.869	76.9232	38.9748	1.97367	0.00127036	0.000451089	0.000228554	0.46287	11.9429	0.664823	13.9024	197.949	18.3279	2.16043	11.9429	0.651625	4656.5	400.982	7417.95	974.98	5374.47	315.729
-25_05_44	low Pb	bd	42.6067	39.981	134.229	50.9616	59.3789	0.858245	0.00104054	0.000298846	0.000348206	1.36379	29.8666	0.496104	73.6175	50.1339	79.4453	0.733252	29.8666	0.37594	4229.67	2171.71	3545.52	1452.39	3994.97	953.607
-25_05_46	low Pb	bd	54.8127	32.7588	140.599	20.5883	33.9703	0.606066	0.00109503	0.000120733	0.000199207	0.61969	18.1414	-0.43419	108.079	-96.5631	109.591	1.61371	18.1414	0.165536	#NUM!	#NUM!	6193.52	1303.03	#VALUE!	#VALUE!
-25_05_48	low Pb	bd	-3.11666	-7.2414	8.30145	36.7925	30.6751	1.19942	-9.86999e-06	0.000215757	0.000179883	-7.41993	182.347	0.197981	98.2618	-3.67731	207.137	-0.134772	182.347	0.88032	2809.63	3212.24	-933.198	-5411.65	#VALUE!	#VALUE!
-25_05_01		bd	1113.64	901.407	2762.26	532.264	1139.64	0.467048	0.0229271	0.00312127	0.00668299	0.97252	5.01027	0.849355	2.95561	120.364	5.81709	1.02826	5.01027	0.861303	5006.84	83.8732	4558.75	319.436	4872.62	110.878
-25_05_03		bd	1516.72	1292.26	3339.31	220.589	98.1774	2.24684	0.0295067	0.00129357	0.000575727	0.059214	4.25621	0.840274	2.40787	1955.7	4.89011	16.8879	4.25621	0.870371	4991.58	68.3754	18592.3	498.304	7695.6	94.6994
-25_05_06	large uncertainty	bd	122.162	107.186	227.343	73.7502	132.27	0.557572	0.00219173	0.000432482	0.000775651	0.869107	11.3909	0.766553	11.8401	121.555	16.4299	1.15061	11.3909	0.693305	4860.83	338.2	4936.34	741.41	4882.53	286.443
-25_05_07		bd	306.095	262.747	630.293	84.0002	176.434	0.476099	0.00575486	0.000492589	0.00103464	0.531521	5.68434	0.890815	4.89002	230.979	7.49827	1.88139	5.68434	0.758087	5074.36	138.362	6822.07	461.598	5530.43	141.31
-25_05_08		1171.78	25004.8	20874.7	52767.4	175.807	613.612	0.286512	0.473424	0.00103096	0.00359831	0.0238837	5.77255	0.830169	0.641883	4790.38	5.80812	41.8695	5.77255	0.993874	4974.4	18.2411	24226.7	688.745	8604.94	111.565
-25_05_09		bd	4077.68	3437.08	8731.6	1857.63	23532.8	0.0789378	0.0779691	0.0108934	0.138	5.16707	3.28584	0.834669	1.68711	22.2626	3.69365	0.193533	3.28584	0.88959	4982.08	47.9282	1140.49	68.33	3195.25	69.3611
-25_05_10		bd	7335.49	6086.57	15759.2	227.501	756.624	0.300679	0.140046	0.0013341	0.00443696	0.0938693	3.67632	0.83133	0.933105	1220.55	3.79289	10.6531	3.67632	0.969266	4976.38	26.5147	15829.6	419.366	7217.22	74.1845
-25_05_13		bd	4308.34	3476.67	8759.43	6021.19	25389	0.237157	0.0793996	0.0353091	0.148885	5.54481	2.4956	0.802287	1.04459	19.9411	2.7054	0.180349	2.4956	0.922452	4925.8	29.7497	1068.88	48.9751	3088.5	51.0136
-25_05_15		bd	1289.74	1155.1	2972.68	231.149	1125.29	0.205412	0.0259996	0.00135549	0.00659886	0.609754	6.40265	0.816049	1.90424	184.445	6.67982	1.64001	6.40265	0.958506	4950.01	54.1736	6258.06	493.425	5303.1	126.679
-25_05_21		bd	257.301	234.107	621.706	47.5807	75.6401	0.629041	0.00534203	0.00027902	0.000443564	0.252244	6.94929	0.914316	5.0053	499.553	8.56421	3.96441	6.94929	0.811434	5111.17	141.402	10329.1	678.491	6311.33	160.236
-25_05_23		bd	309.656	273.818	711.256	58.7302	135.665	0.432906	0.00621363	0.000344403	0.000795561	0.485746	11.2571	0.991992	5.73989	281.453	12.636	2.05869	11.2571	0.890874	5226.07	161.383	7207.01	909.558	5730.32	228.057
-25_05_24		bd	467.443	388.486	958.942	164.286	518.85	0.316635	0.00870989	0.000963399	0.00304261	0.87615	7.30229	0.814024	3.17579	128.046	7.96298	1.14136	7.30229	0.91703	4946.47	90.362	4908.56	483.237	4934.93	148.973
-25_05_26		bd	2635.74	2237.26	5487.57	619.848	511.128	1.21271	0.0497222	0.00363488	0.00299733	0.182815	4.2103	0.841425	1.84268	634.321	4.59588	5.47	4.2103	0.916103	4993.53	52.3214	12036.6	443.328	6553.41	89.1536
-25_05_28		bd	357.901	267.052	644.018	232.61	1735.56	0.134025	0.00609002	0.00136406	0.0101776	4.47935	5.27364	0.74368	5.17399	22.8811	7.38793	0.223247	5.27364	0.713819	4817.52	148.086	1299.01	122.909	3221.9	134.442
-25_05_32		bd	559.088	436.097	1087.13	80.5086	151.501	0.531406	0.00999337	0.000472114	0.000888425	0.231935	5.82882	0.823146	3.05564	489.121	6.58119	4.31155	5.82882	0.885678	4962.32	86.8821	10764.8	582.854	6289.95	125.315
-25_05_33		bd	902.932	743.416	1926.23	374.196	19007.1	0.0196871	0.0171454	0.00219434	0.11146	19.5017	5.55184	0.780122	3.03202	5.5131	6.32583	0.0512775	5.55184	0.877647	4885.87	86.5072	322.36	34.8194	1902.64	103.301
-25_05_34		bd	1519.81	1186.31	3071.43	350.002	2470.34	0.141682	0.0277275	0.00205246	0.0144864	1.51488	4.12299	0.783199	2.21574	71.2527	4.68066	0.66012	4.12299	0.880858	4891.49	63.2015	3267.62	207.979	4346.01	89.6599
-25_05_35		bd	433.933	237.858	664.226	3321.88	14659.5	0.226603	0.00641178	0.01948	0.0859655	30.0779	3.8121	0.55386	4.72935	2.5378	6.07444	0.033247	3.8121	0.627564	4391.38	138.277	210.838	15.7953	1282.94	84.8437
-25_05_37		bd	266.977	217.205	558.973	69.8414	139.173	0.501832	0.00500628	0.00040956	0.000816131	0.477796	6.13123	0.960904	6.53696	277.168	8.96236	2.09295	6.13123	0.684109	5181.27	184.132	7278.8	513.874	5714.81	166.857
-25_05_38		bd	951.626	822.773	1989.36	326.232	798.851	0.408376	0.0180629	0.00191307	0.00468458	0.684023	6.28289	0.868165	2.31551	174.919	6.69599	1.46194	6.28289	0.938306	5037.9	65.6197	5807.89	463.916	5249.56	126.932
-25_05_43		bd	235.638	175.908	412.64	170.34	166.543	1.0228	0.00395541	0.000998896	0.000976632	0.672399	7.35019	0.950153	8.30296	194.748	11.0889	1.48721	7.35019	0.66284	5165.42	234.03	5873.73	543.105	5358	202.447
-25_05_45		bd	907.476	777.371	1950.43	177.359	194.265	0.912975	0.0174463	0.00104006	0.0011392	0.191041	6.24918	0.882767	3.35993	636.832	7.09516	5.23447	6.24918	0.880766	5061.52	95.1207	11797.5	643.273	6557.42	134.54
-25_05_47	large uncertainty	bd	125.239	103.846	263.297	123.864	104.548	1.18476	0.00236303	0.000726357	0.000613085	0.715209	8.18923	0.945435	14.8413	182.182	16.9508	1.39819	8.18923	0.483118	5158.4	418.446	5638.78	587.922	5290.63	295.021
-25_05_49		bd	1259.62	1019.05	2531.45	85.8335	164.821	0.520768	0.0230846	0.00050334	0.000966534	0.107232	9.45338	0.857432	2.36915	1102	9.74573	9.3256	9.45338	0.970002	5020.26	67.1914	15050	1016.28	7113.56	180.664
-25_05_50		bd	506.546	414.985	1070.9	125.397	937.369	0.133776	0.00956201	0.000735347	0.00549687	1.65954	3.32236	0.838743	3.18218	69.6544	4.60047	0.602578	3.32236	0.722178	4988.99	90.3733	3040.22	159.082	4323.3	88.162
-25_05_51	large uncertainty	bd	71.3343	66.5427	206.523	67.9488	5515.51	0.0123196	0.00165284	0.000398462	0.0323437	66.6609	12.4401	0.882856	43.7614	1.82526	45.4952	0.0150013	12.4401	0.273438	5061.66	1238.89	95.9864	23.6613	1054.58	469.49
-25_05_52		bd	133.643	102.114	275.695	100.781	223.888	0.450142	0.00245455	0.000590997	0.00131291	1.53516	7.97977	0.84335	9.81139	75.7112	12.6467	0.651397	7.97977	0.630974	4996.77	278.546	3233.66	393.558	4406.81	226.282
-25_05_53		bd	476.004	399.371	1507.19	72.951	165.436	0.440962	0.0114343	0.000427795	0.00097014	0.24209	11.5547	0.813201	4.10493	462.943	12.2622	4.1307	11.5547	0.942303	4945.04	116.807	10541.4	1099.96	6234.21	222.275
204-01_DolFrac_01	low Pb	42313.3	814304	694382	1777758	1174.44	721792	0.00162712	9.70163	0.00492833	3.02887	0.854284	6.24292	0.845325	0.439894	136.373	6.2584	1.17057	6.24292	0.997527	5000.09	12.4868	4995.91	420.08	4998.42	118.924
204-01_DolFrac_05	low Pb	120149	2239861	1925967	5032875	3041.89	205640	0.0147923	27.1547	0.0127648	0.862932	0.091516	5.92868	0.855513	0.45041	1288.35	5.94577	10.927	5.92868	0.997127	5017.09	12.7758	15979.4	664.799	7272.07	114.004
204-01_DolFrac_06	low Pb	21001.1	392070	332637	855897	1288.79	544626	0.00236637	4.66597	0.00540817	2.28543	1.11391	13.8798	0.837028	0.715363	103.561	13.8982	0.897742	13.8798	0.998674	4986.08	20.3188	4129.99	795.386	4721.3	246.927
204-01_DolFrac_07	low Pb	68919.3	1250201	1102021	2768716	2172.51	310650	0.00699342	15.1171	0.00911654	1.30359	0.235527	5.57521	0.854811	0.437347	500.189	5.59234	4.24579	5.57521	0.996937	5015.92	12.4059	10684.5	557.006	6312.62	107.45
204-01_DolFrac_18	low Pb	20854.8	379109	327014	845312	7932.15	271289	0.0292387	3.3791	0.0261653	0.894883	0.664635	7.94079	0.855111	0.526663	177.315	7.95824	1.50458	7.94079	0.997808	5016.42	14.9392	5918.6	587.429	5263.29	149.19
204-01_DolFrac_19	low Pb	4956.6	95818.6	66393.8	211098	4829.94	200836	0.0240492	0.813089	0.0159322	0.662484	1.9289	9.44647	0.848148	0.800418	60.5993	9.48032	0.51843	9.44647	0.996429	5004.82	22.7159	2692.52	402.966	4184.04	173.663
204-01_DolFrac_23	low Pb	99754.5	1897039	1635293	4501192	2169.62	297092	0.00730285	17.4974	0.00715678	0.979998	0.147605	17.702	0.822513	1.90693	767.973	17.8044	6.77482	17.702	0.994248	4961.23	54.2229	13220.9	1733.34	6747.28	308.944
204-01_DolFrac_24	low Pb	5908.48	101662	87819.9	194724	2050.62	151747	0.0135134	0.836819	0.00676424	0.500559	1.36685	6.70027	0.857271	3.38742	86.4374	7.50788	0.731607	6.70027	0.892432	5020	96.0716	3539.4	355.022	4539.7	140.534
204-01_DolFrac_25	low Pb	5390.83	101867	85976.5	222572	1489.7	140727	0.0105857	0.893904	0.004914	0.464209	1.26105	6.27017	0.817445	1.60742	89.3374	6.47293	0.792992	6.27017	0.968675	4952.44	45.7245	3763.97	347.972	4572.83	122.322
204-01_DolFrac_27	low Pb	11036.6	203704	173920	448269	1879.33	141880	0.013246	1.79884	0.00619924	0.468009	0.679385	10.0226	0.860296	0.627258	174.517	10.0422	1.47192	10.0226	0.998047	5024.99	17.786	5833.97	726.878	5247.23	184.872
204-01_DolFrac_28	low Pb	8540.98	160494	138877	350635	6625.36	214998	0.0308159	1.41574	0.0218547	0.709201	1.24938	8.71964	0.857139	0.630187	94.5501	8.74238	0.800395	8.71964	0.997399	5019.78	17.8731	3790.53	481.358	4629.79	162.034
204-01_DolFrac_31	low Pb	5191.87	99624.7	83933	219010	2202.17	244392	0.00901081	0.876812	0.00726417	0.806162	2.24954	6.5426	0.840557	0.771046	51.4967	6.58788	0.444535	6.5426	0.993127	4992.06	21.8946	2370.91	254.493	4021.68	123.422
204-01_DolFrac_32	low Pb	21980	409487	352139	895970	2212.72	186811	0.0118447	3.61033	0.00729897	0.616222	0.505189	12.6887	0.849939	0.529499	231.868	12.6998	1.97946	12.6887	0.99913	5007.81	15.0252	7037.81	1004.39	5534.31	228.933
204-01_DolFrac_36	low Pb	8811.38	151312	132137	341821	1225.93	120221	0.0101974	1.36187	0.00404391	0.396564	0.670949	15.0317	0.828781	1.26771	170.238	15.0851	1.49043	15.0317	0.996463	4972.02	36.0297	5882.06	1066.53	5222.17	266.353
204-01_DolFrac_39	low Pb	66701	1249796	1075225	2741962	2279.98	497009	0.00458741	11.0361	0.00752084	1.63945	0.387907	8.96809	0.849855	0.454247	301.941	8.97959	2.57794	8.96809	0.99872	5007.67	12.89	8217.8	783.482	5801.43	167.199
204-01_DolFrac_40	low Pb	47328.4	878312	759982	1801719	2542.68	133230	0.0190849	7.49252	0.00838736	0.439476	0.147144	7.25813	0.855102	0.476083	800.908	7.27372	6.79608	7.25813	0.997856	5016.4	13.5044	13238.5	768.111	6789.86	137.747
204-01_DolFrac_42	low Pb	9273.81	179471	150995	386577	2238.84	327127	0.00684393	1.56176	0.00738511	1.07907	1.7094	10.2979	0.828255	0.502982	66.7771	10.3102	0.585002	10.2979	0.998809	4971.12	14.2959	2969.13	472.301	4281.08	187.798
204-01_DolFrac_44	low Pb	15473.3	302560	250039	660339	3054.53	261122	0.0116977	2.64184	0.0100758	0.861346	1.02163	11.3762	0.844721	0.535861	113.953	11.3888	0.978827	11.3762	0.998892	4999.07	15.2116	4399.7	687.511	4817.51	206.722
204-01_DolFrac_46	low Pb	83479.6	1553808	1311875	3452858	1828.21	127713	0.014315	40.019	0.0150064	1.0483	0.0677841	8.00149	0.854309	0.444883	1736.97	8.01385	14.7527	8.00149	0.998458	5015.09	12.6201	17772.8	900.24	7575.24	150.865
204-01_DolFrac_55	low Pb	1107.66	22956.8	19745.4	50346.9	4698.67	44084.5	0.106583	0.589333	0.0385678	0.361856	1.76933	8.20913	0.849344	0.774272	66.1577	8.24557	0.565185	8.20913	0.995581	5006.82	21.972	2888.02	371.282	4271.76	152.85
204-01_DolFrac_56	low Pb	bd	458.051	225.891	475.982	20590.3	60365	0.341097	0.00734647	0.16901	0.49549	120.001	5.14091	0.484748	7.26049	0.55672	8.89627	0.00833325	5.14091	0.577873	4195.49	214.602	53.497	5.47538	449.389	62.6369
204-01_DolFrac_72	low Pb	27795.6	525771	448854	1153705	3839.93	98234.7	0.0390893	13.4799	0.0315191	0.806334	0.168378	7.29599	0.844427	0.516817	691.167	7.31427	5.93902	7.29599	0.997501	4998.58	14.6713	12487.7	758.653	6640.43	138.44
204-01_DolFrac_76	low Pb	9897.01	185608	157146	397885	1153.99	338503	0.0034091	4.69089	0.00947222	2.77851	1.78968	6.00004	0.836414	0.49039	64.4097	6.02005	0.558758	6.00004	0.996677	4985.04	13.9294	2861.49	271.5	4244.98	113.766
204-01_DolFrac_78	low Pb	499.541	11002.1	8860.85	25209.6	17929.1	71221.7	0.251737	0.285471	0.147167	0.584605	6.02005	6.43374	0.812268	2.40102	18.5954	6.86716	0.166112	6.43374	0.936885	4943.4	68.3264	990.652	117.091	3021.06	124.398
204-01_DolFrac_79	low Pb	bd	1541.93	1321.86	3233.63	17019.5	39074.3	0.435567	0.0386185	0.1397	0.320731	22.1965	7.78665	0.97276	11.2265	6.03986	13.6626	0.0450521	7.78665	0.569924	5198.53	316.003	284.072	43.1343	1981.61	213.855
204-01_DolFrac_99	low Pb	1032.01	18540.5	15303.4	43943.1	21297.2	57640.3	0.369486	0.49267	0.174813	0.473125	2.58908	5.98339	0.850605	1.92776	45.2781	6.28627	0.386237	5.98339	0.951818	5008.92	54.7002	2105.36	211.432	3893.66	117.796
204-01_DolFrac_100	low Pb	bd	2007.91	1521.84	3802.28	20221.5	51072.7	0.395935	0.0464379	0.165983	0.419217	21.9575	9.10607	0.90665	9.62451	5.69066	13.2496	0.0455425	9.10607	0.687272	5099.28	272.034	287.097	50.9374	1929.95	206.382
204-01_DolFrac_108	low Pb	bd	5339.7	5667.88	13140.4	7997.78	24503.6	0.326392	0.152943	0.0656477	0.201132	3.85546	7.37961	0.888744	3.05899	31.7692	7.98849	0.259372	7.37961	0.92378	5071.07	86.5657	1486.63	193.033	3543.17	146.224
204-01_DolFrac_110	low Pb	1606.21	33675.8	27870.9	65092.9	2147.13	100958	0.0212675	0.802082	0.0176242	0.828689	2.78397	7.84869	0.845626	4.73784	41.862	9.16782	0.359199	7.84869	0.856112	5000.59	134.485	1978.38	262.024	3815.79	167.267
204-01_DolFrac_111	low Pb	25988.5	494517	440693	1097550	1044.46	209233	0.00499186	12.8746	0.0085732	1.71744	0.39529	5.95862	0.859761	0.695095	299.756	5.99902	2.52979	5.95862	0.993265	5024.11	19.7102	8130.47	528.337	5794.08	114.693
204-01_DolFrac_112	low Pb	119697	2237207	1932456	5193101	2736.62	117932	0.023205	59.2998	0.0224628	0.968017	0.0447371	9.87038	0.855438	0.462212	2635.28	9.88119	22.3528	9.87038	0.998905	5016.96	13.1107	20310.8	1115.71	7998.3	183.05
204-01_DolFrac_115	low Pb	99308.4	1963822	1588915	4060029	2638.08	66078	0.0399238	48.216	0.021654	0.542384	0.034917	6.6889	0.855518	0.463995	3376.74	6.70498	28.6393	6.6889	0.997603	5017.09	13.1612	21847.6	783.669	8249.95	127.739
204-01_DolFrac_117	low Pb	bd	5451.05	4145.06	9421.1	1284.12	81130.4	0.0158278	0.120447	0.0105403	0.665938	13.7303	6.34319	0.779403	5.37967	7.82324	8.31726	0.0728315	6.34319	0.762653	4884.56	153.498	453.192	55.2815	2210.88	139.695
204-01_DolFrac_126	low Pb	bd	1400.95	854.957	1970.27	2239.36	78547.7	0.0285096	0.0267668	0.0183812	0.644739	51.772	8.30188	0.662183	3.57249	1.76275	9.03791	0.0193155	8.30188	0.918561	4650.76	103.069	123.328	20.2507	1031.86	110.831
204-01_DolFrac_127	low Pb	2637.3	53061.7	45637.6	116446	1469.2	33823.4	0.0434374	1.36264	0.0120595	0.277631	0.583681	7.0109	0.853711	0.626801	201.577	7.03886	1.71327	7.0109	0.996027	5014.1	17.7814	6434.51	546.892	5392.82	133.117
204-01_DolFrac_128	low Pb	bd	472.752	110.629	243.386	1935.77	86755.5	0.022313	0.00523639	0.0158893	0.71211	171.254	3.61556	0.24729	8.50708	0.199008	9.24352	0.00583928	3.61556	0.391145	3167.5	269.734	37.5329	2.7056	184.287	30.6879
204-01_DolFrac_129	low Pb	8449.36	157447	137023	349125	4135.11	59935.2	0.068993	4.07626	0.033942	0.491962	0.351534	28.8289	0.849003	1.02213	332.85	28.847	2.84467	28.8289	0.999372	5006.25	29.0064	8681.32	2290.42	5900.08	461.38
204-01_DolFrac_132	low Pb	1070.45	20495.3	16978.8	40736.9	4156.33	77081.9	0.0539209	0.495355	0.0341161	0.632707	3.25123	8.57128	0.842208	0.930931	35.7007	8.62169	0.307575	8.57128	0.994154	4994.84	26.4315	1728.76	254.839	3658.22	157.452
204-01_DolFrac_134	low Pb	95359.4	1681011	1443579	3978907	3969.69	132046	0.0300629	44.9905	0.0325842	1.08387	0.0761281	11.1614	0.85329	0.426514	1544.75	11.1695	13.1358	11.1614	0.999271	5013.4	12.1	17074.7	1215.14	7456.23	204.608
204-01_DolFrac_135	low Pb	920.096	17076.8	14483.9	37503.4	1775.69	56040.9	0.0316856	0.437422	0.0145753	0.459997	2.96282	9.50119	0.843214	2.04886	39.2228	9.7196	0.337517	9.50119	0.97753	4996.54	58.1681	1874.71	301.934	3751.27	176.253
204-01_DolFrac_143	low Pb	449.289	10779.6	8867.11	18115.9	2539.39	70033.3	0.0362597	0.239172	0.0208439	0.57485	6.12854	4.79424	0.849447	6.33395	19.1023	7.94378	0.163171	4.79424	0.603521	5006.99	179.741	974.374	86.1316	3046.99	142.77
204-01_DolFrac_145	low Pb	22911.1	421002	363884	924647	290.324	19717.5	0.0147242	10.8275	0.00238305	0.161846	0.0430233	5.20612	0.853529	0.473612	2734.14	5.22762	23.2432	5.20612	0.995888	5013.79	13.4359	20552	613.398	8035.68	100.935
204-01_DolFrac_149	low Pb	40086.4	760017	647477	1637758	2207.89	253794	0.00869952	19.2873	0.0181229	2.0832	0.316868	5.36334	0.848649	0.537323	369.11	5.39019	3.15588	5.36334	0.995019	5005.66	15.2487	9183.08	504.807	6004.77	103.687
204-01_DolFrac_02		49168.7	933454	796607	2036488	2651.07	801922	0.0033059	11.1189	0.0111248	3.36512	0.831514	1.75912	0.845587	0.430095	140.15	1.81093	1.20263	1.75912	0.971388	5000.53	12.2084	5090.41	122.658	5025.97	35.8741
204-01_DolFrac_03		19905.7	382355	328907	833039	1358.18	707650	0.00191928	4.5588	0.00569935	2.96953	1.80863	4.34663	0.840432	0.464989	64.041	4.37143	0.552904	4.34663	0.994327	4991.85	13.204	2837.24	196.503	4239.24	83.8492
204-01_DolFrac_04		1217.54	22482.4	17936	45161	2979.39	160503	0.0185628	0.252631	0.0125025	0.673524	6.90988	1.84263	0.794685	1.52686	15.85	2.39303	0.14472	1.84263	0.770001	4912.24	43.511	871.3	29.9645	2867.8	44.7136
204-01_DolFrac_08		33331.8	633918	537609	1370845	2567.55	786578	0.00326421	7.50512	0.0107743	3.30074	1.20274	1.32707	0.840336	0.453434	96.2914	1.40239	0.831435	1.32707	0.946287	4991.69	12.8759	3900.73	77.2101	4648.13	27.8025
204-01_DolFrac_09		1278.76	25003	18492.7	45831.2	4141.09	204642	0.0202357	0.263694	0.0173774	0.858746	8.10185	2.43219	0.777239	2.30624	13.2214	3.35176	0.123429	2.43219	0.725647	4880.59	65.8156	750.268	34.3604	2695.58	61.3866
204-01_DolFrac_10		15990.1	297031	254247	655050	2043.84	132387	0.0154383	3.5611	0.0085766	0.55554	0.41927	2.79928	0.85486	0.459943	281	2.83682	2.3851	2.79928	0.986769	5016	13.0468	7860.65	249.403	5728.7	55.8409
204-01_DolFrac_11		41362.6	785188	670809	1718954	12524.4	817543	0.0153195	6.9152	0.0413133	2.69678	0.997271	1.32365	0.845766	0.430379	116.881	1.39186	1.00274	1.32365	0.950993	5000.83	12.2163	4477.13	84.8832	4843.05	27.6458
204-01_DolFrac_12		49234.1	935506	796815	2049847	7711.55	819223	0.00941324	8.23775	0.0254376	2.70232	0.830204	1.54115	0.852018	0.44219	141.439	1.60333	1.20452	1.54115	0.961216	5011.28	12.5459	5095.96	107.662	5035.2	31.8272
204-01_DolFrac_13		60137.7	1128264	962419	2467468	4206.89	958725	0.00438801	9.92788	0.013877	3.16248	0.812816	1.37584	0.845936	0.412598	143.434	1.43638	1.23029	1.37584	0.957856	5001.11	11.7115	5170.87	97.1152	5049.32	28.562
204-01_DolFrac_14		42145.7	785934	674343	1723901	2028.35	632779	0.00320547	6.9353	0.0066908	2.08731	0.760171	2.30385	0.850763	0.427037	154.242	2.34309	1.31549	2.30385	0.983252	5009.19	12.117	5412.55	166.58	5122.59	46.2086
204-01_DolFrac_15		65067.5	1231446	1056411	2703052	7114.46	777682	0.00914829	10.8704	0.023468	2.56529	0.60444	3.62201	0.849748	0.435973	193.751	3.64816	1.65442	3.62201	0.992834	5007.5	12.3715	6293.17	284.675	5352.81	71.1528
204-01_DolFrac_16		52492.6	982155	842899	2161102	2236.92	785495	0.00284778	8.68205	0.00737878	2.59106	0.752809	2.37117	0.85411	0.452025	156.363	2.41388	1.32836	2.37117	0.98231	5014.76	12.8229	5448.27	172.095	5136.37	47.5764
204-01_DolFrac_17		17074.3	327054	275446	696492	1458.65	794086	0.00183689	2.82927	0.00481155	2.6194	2.26142	2.05064	0.841956	0.678881	51.3114	2.1601	0.4422	2.05064	0.94933	4994.42	19.2755	2360.48	80.5592	4018.09	42.1412
204-01_DolFrac_20		4513.01	86707.5	72962.7	175064	1302.19	93375.3	0.0139458	0.729068	0.00429545	0.308011	1.05839	4.61548	0.84312	1.54608	109.787	4.86755	0.944832	4.61548	0.948214	4996.38	43.8942	4288	282.798	4780.02	93.5147
204-01_DolFrac_21		687221	13703920	11749170	30318870	5242.2	297755	0.0176057	121.474	0.0172921	0.982186	0.0226797	4.55192	0.849078	0.527217	5159.6	4.58235	44.0923	4.55192	0.993359	5006.38	14.9614	24552.5	549.736	8680.31	89.02
204-01_DolFrac_22		147677	2803742	2411296	6369460	5970.29	233031	0.0256202	25.2316	0.0196938	0.768685	0.0784292	1.52729	0.855691	0.468076	1503.65	1.59741	12.7504	1.52729	0.956106	5017.38	13.2767	16896.5	180.052	7428.86	31.9113
204-01_DolFrac_26	outlier	1093.86	22830.1	21505.7	48855.7	2953.11	175553	0.0168218	0.202976	0.00974123	0.579085	7.00042	4.45196	0.961893	3.96964	18.9369	5.96473	0.142849	4.45196	0.746381	5182.72	111.81	860.751	71.348	3038.61	108.99
204-01_DolFrac_29		1027.16	22522.7	18390.3	43692.1	5015.44	224407	0.0223498	0.184274	0.0165441	0.740236	9.56424	2.28122	0.81187	2.01218	11.6988	3.04184	0.104556	2.28122	0.749945	4942.7	57.263	641.055	27.7805	2580.61	55.3708
204-01_DolFrac_30		866.364	18240.6	14701.2	33714.3	1897.37	117290	0.0161767	0.14518	0.00625872	0.386898	5.82228	3.60634	0.811393	2.71766	19.2063	4.51568	0.171754	3.60634	0.798626	4941.87	77.3425	1021.77	67.7953	3052.24	83.6244
204-01_DolFrac_33		22759.3	416042	362132	922926	5964.34	217784	0.0273865	3.70508	0.0196742	0.718389	0.49544	2.5382	0.857803	0.460664	238.617	2.57967	2.01841	2.5382	0.983926	5020.88	13.0645	7121.54	215.197	5563.33	50.8724
204-01_DolFrac_34		10172.5	186207	160278	406863	2591.89	200945	0.0128985	1.64083	0.00854971	0.662844	1.02946	3.6081	0.851205	0.51457	113.954	3.64461	0.971383	3.6081	0.989983	5009.93	14.6003	4375.41	225.235	4817.52	70.8399
204-01_DolFrac_35		81064.1	1510168	1296810	3344346	1519.6	567659	0.00267695	13.3979	0.00501259	1.8725	0.340825	3.95332	0.853694	0.447398	345.204	3.97856	2.93406	3.95332	0.993657	5014.07	12.6921	8829.47	369.349	5936.97	77.5254
204-01_DolFrac_37		6857.5	137095	113571	288690	769.452	337129	0.00228237	1.17474	0.00253814	1.11207	2.30422	2.37601	0.835711	0.634908	49.9848	2.45938	0.433986	2.37601	0.966103	4983.85	18.0354	2323.66	92.05	3992.01	47.8207
204-01_DolFrac_38		39813.2	753588	640422	1646707	5381.92	841220	0.00639776	6.62283	0.017753	2.77488	1.04715	1.8617	0.841732	0.421733	110.783	1.90887	0.954973	1.8617	0.975289	4994.04	11.9745	4321.53	116.195	4789.11	37.7089
204-01_DolFrac_41		1811.07	34591.3	28994.8	73180.9	3499.93	116376	0.0300745	0.297885	0.011545	0.383881	3.27435	2.62243	0.840507	0.763274	35.3771	2.73125	0.305404	2.62243	0.960158	4991.98	21.674	1718.05	78.6197	3649.22	52.5567
204-01_DolFrac_43	outlier	bd	3271.78	1939.08	5716.7	2526.8	181198	0.013945	0.0238008	0.00833499	0.597707	59.2157	7.62876	0.66423	2.68732	1.54592	8.08825	0.0168874	7.62876	0.943191	4655.21	77.5142	107.954	16.3133	948.868	95.1375
204-01_DolFrac_45		122635	2305121	1982363	5181007	2379.44	845877	0.00281299	20.6228	0.00784891	2.79024	0.33146	4.9577	0.853247	0.428934	354.772	4.97622	3.01695	4.9577	0.996278	5013.32	12.1687	8963.89	463.03	5964.65	96.0788
204-01_DolFrac_47		5585.05	107775	90541.8	230568	1291.33	337051	0.00383126	2.71637	0.0105995	2.7666	2.83203	2.82082	0.830622	0.531844	40.4214	2.87052	0.353104	2.82082	0.982686	4975.17	15.1135	1949.4	94.2143	3781.08	55.3498
204-01_DolFrac_48		bd	5458.34	4245.36	10968.1	3139.43	77166.3	0.040684	0.130926	0.0257692	0.6334	12.8696	1.57842	0.764632	1.07995	8.18827	1.91251	0.0777023	1.57842	0.825312	4857.24	30.8527	482.393	14.6558	2252.05	34.0348
204-01_DolFrac_49		bd	6161.6	4911.04	12475.3	2292.58	57553.8	0.0398337	0.149143	0.018818	0.472416	8.46663	1.57183	0.782298	0.836792	12.7341	1.7807	0.118111	1.57183	0.882707	4889.84	23.8704	719.681	21.3717	2660.18	32.9871
204-01_DolFrac_50		bd	4495.77	3724.04	9782.88	9054.81	38756.6	0.233633	0.114021	0.0743241	0.318124	7.81751	3.81086	0.850768	2.58108	14.9985	4.60267	0.127918	3.81086	0.827966	5009.2	73.2373	775.977	55.4823	2815.15	84.0504
204-01_DolFrac_51		2898.26	51920.2	44744.2	113153	8281.83	42335.2	0.195625	1.32889	0.0679792	0.347498	0.754149	1.8158	0.871505	0.635444	159.264	1.92378	1.326	1.8158	0.943872	5043.34	18.0038	5441.74	132.097	5154.92	38.0998
204-01_DolFrac_52		5936.7	110914	95479.6	244382	4382.65	64465.4	0.0679845	2.85503	0.0359739	0.529148	0.526809	4.38569	0.853427	0.531539	223.264	4.41778	1.89822	4.38569	0.992735	5013.62	15.0793	6859.61	360.093	5496.09	85.6028
204-01_DolFrac_53		15438.2	290894	247207	631042	1522.59	395287	0.00385185	7.40486	0.0124977	3.24461	1.21673	1.60343	0.841883	0.447318	95.3597	1.66465	0.821878	1.60343	0.96322	4994.3	12.7008	3867	92.5897	4638.36	32.9151
204-01_DolFrac_54		500.023	7944.64	6141.37	15770.9	3398	105184	0.0323054	0.189101	0.0278916	0.863372	11.949	1.75873	0.763443	1.45753	8.80542	2.28419	0.0836889	1.75873	0.769959	4855.02	41.6438	518.104	17.4873	2318.05	40.824
204-01_DolFrac_57		bd	4866.94	3583.31	9282.72	6668.53	81785.2	0.0815371	0.112313	0.0547369	0.671313	15.251	4.70958	0.762246	4.60345	6.88818	6.58574	0.0655697	4.70958	0.715118	4852.78	131.541	409.409	37.256	2097.14	110.544
204-01_DolFrac_58		581.284	10447.4	8432.84	21292.7	4131.52	88544.4	0.0466604	0.254438	0.0339125	0.726794	7.78519	2.68234	0.800654	0.803467	14.1736	2.8001	0.128449	2.68234	0.957948	4922.9	22.8855	779.012	39.2454	2761.4	51.7732
204-01_DolFrac_59		1484.93	27889.9	22611	57431.5	1082.05	192128	0.00563193	0.683598	0.00888173	1.57703	6.20042	1.21349	0.801313	0.610565	17.8109	1.35844	0.161279	1.21349	0.8933	4924.07	17.3901	963.883	21.6918	2979.58	25.7899
204-01_DolFrac_60		19518.6	366763	315197	804516	2695.42	117714	0.0228982	9.4147	0.0221247	0.966222	0.293946	3.72792	0.850405	0.437442	398.716	3.7535	3.40198	3.72792	0.993186	5008.59	12.4126	9553.94	361.141	6082.91	73.3218
204-01_DolFrac_61		88210.1	1645457	1416318	3634688	2084.61	187384	0.0111248	42.4125	0.017111	1.53809	0.104312	2.66139	0.855633	0.440454	1130.47	2.69759	9.58658	2.66139	0.98658	5017.29	12.4933	15210.9	303.461	7139.43	53.3092
204-01_DolFrac_62		3527.32	65930.6	55934.1	140770	1380.46	153326	0.00900348	1.66342	0.0113312	1.25853	2.13964	2.21058	0.84363	1.17666	54.3398	2.50423	0.467369	2.21058	0.882737	4997.24	33.4047	2472.01	90.1436	4075.23	48.7471
204-01_DolFrac_63		15358.9	291081	246640	631952	1107.37	286884	0.00386001	7.40821	0.00908958	2.35481	0.902087	1.12123	0.841163	0.511841	128.51	1.23253	1.10854	1.12123	0.909696	4993.08	14.5336	4809	75.5554	4938.58	24.5377
204-01_DolFrac_64		1772.71	33146.7	27286.9	70131.6	2256.08	40415.4	0.0558223	0.826944	0.0185184	0.331739	1.12459	2.51612	0.834196	1.34929	102.231	2.85507	0.889216	2.51612	0.88128	4981.27	38.3328	4100.96	150.908	4708.3	55.8535
204-01_DolFrac_65		2547.55	49512.4	40592	102870	1209.64	276554	0.00437397	1.22222	0.009929	2.27002	5.09667	1.36792	0.80907	0.902575	21.8779	1.63885	0.196206	1.36792	0.83468	4937.79	25.6913	1154.91	28.8631	3178.32	31.3379
204-01_DolFrac_66		961.636	19815.1	15980.2	39348	1485.45	148676	0.0099912	0.475925	0.0121929	1.22037	6.85154	1.48167	0.796575	1.39978	16.023	2.03832	0.145953	1.48167	0.726909	4915.62	39.8837	878.236	24.2844	2878.17	38.233
204-01_DolFrac_67		19437.5	365634	310958	788604	1844.41	354462	0.00520341	9.27993	0.0151394	2.90951	0.87941	1.34358	0.842717	0.4262	132.067	1.40956	1.13713	1.34358	0.953192	4995.7	12.1004	4895.81	91.5173	4966.09	28.0195
204-01_DolFrac_68		755.998	13562.1	10695.6	26784.1	3012.64	144112	0.0209049	0.323277	0.0247284	1.1829	9.69666	2.00875	0.784123	1.09785	11.1447	2.28918	0.103128	2.00875	0.877496	4893.17	31.3128	632.716	24.1664	2535.3	41.7883
204-01_DolFrac_69		20652.2	382590	323572	827983	7429.77	394317	0.0188421	9.71662	0.0609854	3.23665	0.944679	1.36356	0.840331	0.452511	122.595	1.43668	1.05856	1.36356	0.949102	4991.68	12.8497	4654.36	89.7733	4891.11	28.5349
204-01_DolFrac_70		16134.8	305065	259889	661277	1116.09	305738	0.00365048	7.76642	0.00916114	2.50957	0.918041	1.05012	0.843941	0.44515	126.694	1.14057	1.08928	1.05012	0.920693	4997.76	12.6373	4749.83	70.2038	4924.24	22.7247
204-01_DolFrac_71		20094.5	380505	323205	817286	1993.81	340652	0.00585294	9.63334	0.0163657	2.79615	0.819539	1.2443	0.840306	0.438954	141.31	1.31946	1.2202	1.2443	0.943041	4991.64	12.4648	5141.64	87.5709	5034.28	26.2642
204-01_DolFrac_73		43382.7	799875	688842	1785587	1098.23	262037	0.00419114	20.738	0.00901457	2.15086	0.299979	3.6243	0.853748	0.440872	392.234	3.65102	3.33357	3.6243	0.992683	5014.16	12.5069	9452.96	349.784	6066.31	71.3858
204-01_DolFrac_74		11340.6	220545	186203	471815	1502.89	418680	0.0035896	5.56444	0.0123361	3.43662	1.74495	1.28246	0.838088	0.543307	66.193	1.3928	0.573082	1.28246	0.920779	4987.88	15.4306	2920.46	59.9564	4272.29	27.488
204-01_DolFrac_75		1431.14	26997	22953.7	59191	6062.29	31000.2	0.195556	0.691257	0.0497607	0.254457	1.05015	2.01901	0.843998	1.60629	110.764	2.58004	0.952248	2.01901	0.782552	4997.86	45.6007	4312.53	125.736	4788.94	50.6416
204-01_DolFrac_77		593.357	10252	8375.24	19821.7	7492.41	102896	0.0728157	0.243519	0.0614995	0.844591	9.18424	2.20019	0.802199	2.68112	12.0377	3.46832	0.108882	2.20019	0.634368	4925.65	76.358	666.253	27.7935	2607.35	63.0335
204-01_DolFrac_80		7897.72	149438	125885	320332	1532.39	244091	0.00627795	3.77262	0.0125782	2.00356	1.51252	2.0923	0.836303	0.529475	76.2022	2.15825	0.661147	2.0923	0.969441	4984.85	15.0397	3271.61	106.481	4413.29	42.3651
204-01_DolFrac_81		1269.84	24829.1	20491.5	52090.1	926.865	158438	0.00585001	0.616957	0.00760794	1.3005	5.88466	1.26629	0.810696	0.655793	18.9864	1.42603	0.169933	1.26629	0.887984	4940.65	18.6644	1011.74	23.6702	3041.13	27.1443
204-01_DolFrac_82		19086.6	355430	301542	770622	1662.54	434780	0.00382387	9.04177	0.0136466	3.56878	1.09766	2.70989	0.840688	0.46659	105.554	2.74976	0.911029	2.70989	0.985499	4992.28	13.2492	4174.97	164.442	4740.47	53.863
204-01_DolFrac_83		538.343	11899.8	9652.24	23709.9	1201.54	62963.3	0.0190832	0.28667	0.00986252	0.516818	4.95309	2.71508	0.816455	2.80929	22.7175	3.90688	0.201894	2.71508	0.694947	4950.71	79.9187	1185.49	58.5348	3214.92	73.285
204-01_DolFrac_84		1894.39	35396.4	30642.8	77465.5	2106.55	72673.7	0.0289864	0.908898	0.0172911	0.596523	1.89175	3.76686	0.858838	1.54523	62.5682	4.07148	0.528612	3.76686	0.925182	5022.59	43.8197	2735.6	165.795	4215.99	78.2847
204-01_DolFrac_85		672.447	14670.9	12171	30384.2	187.038	66666.7	0.00280557	0.362446	0.00153525	0.547216	4.14615	3.92159	0.815406	4.48211	27.1041	5.95552	0.241188	3.92159	0.65848	4948.89	127.517	1392.87	97.5078	3387.23	110.412
204-01_DolFrac_86		40418.9	746836	645191	1634774	4419.34	81458.4	0.0542528	19.1705	0.036275	0.66863	0.101516	2.69974	0.854782	0.432343	1160.45	2.73414	9.85065	2.69974	0.987419	5015.87	12.264	15369.7	308.493	7165.99	54.0137
204-01_DolFrac_87		17944.9	336956	282597	729660	868.53	400815	0.00216691	8.54534	0.00712911	3.28999	1.08277	1.59058	0.840215	0.734731	106.945	1.75208	0.923559	1.59058	0.907826	4991.48	20.8639	4217.1	97.7164	4753.64	34.6529
204-01_DolFrac_88		45365.7	836715	720604	1833432	2310.24	100382	0.0230146	21.4756	0.018963	0.823957	0.108249	3.53866	0.855898	0.425343	1089.7	3.56413	9.238	3.53866	0.992853	5017.72	12.0645	14995	399.06	7102.17	69.8539
204-01_DolFrac_89		974.961	18288.2	15607.7	40345	2954.97	108802	0.0271591	0.47021	0.0242551	0.893075	5.55744	2.48252	0.838241	2.59422	20.7874	3.59067	0.179939	2.48252	0.691382	4988.14	73.6782	1066.64	48.626	3128.73	67.2915
204-01_DolFrac_90		23824.5	433427	378253	957599	1495.16	237894	0.00628497	11.2059	0.0122726	1.95269	0.504873	4.15421	0.848035	0.588496	231.493	4.19569	1.9807	4.15421	0.990114	5004.63	16.7017	7040.5	346.43	5532.68	81.4797
204-01_DolFrac_91		31309.2	577834	497236	1267748	916.68	350975	0.00261181	14.8384	0.00752433	2.88089	0.55807	3.51734	0.847639	0.49991	209.329	3.55269	1.79189	3.51734	0.99005	5003.97	14.188	6618.66	284.676	5430.95	69.3786
204-01_DolFrac_92		11693.3	217264	182037	460523	1348.24	402118	0.00335285	5.44576	0.0110667	3.30068	1.71991	1.2225	0.83585	0.593352	66.9774	1.35888	0.581426	1.2225	0.899633	4984.08	16.8547	2954.56	57.6895	4284.08	26.8321
204-01_DolFrac_93		1240.41	27005.1	21805.6	54103.4	1787.55	214538	0.00833207	0.651814	0.0146726	1.76098	7.36769	2.01786	0.810652	1.99999	15.1638	2.84108	0.135728	2.01786	0.710246	4940.57	56.9214	820.459	31.0162	2825.58	52.7329
204-01_DolFrac_94		9698.17	179006	150287	384006	43836.9	327209	0.133972	4.51773	0.359824	2.68581	1.68813	1.7454	0.837606	0.501542	68.3816	1.81603	0.59237	1.7454	0.961107	4987.07	14.2449	2999.02	83.1739	4304.84	35.7123
204-01_DolFrac_95		910.865	21509.2	17518.5	44027.6	2120.9	104240	0.0203463	0.526037	0.0174089	0.855629	4.51473	3.89263	0.801563	1.46335	24.4688	4.1586	0.221497	3.89263	0.936043	4924.52	41.6783	1289.78	90.369	3287.25	78.0569
204-01_DolFrac_96		2934.33	55963.8	47148.1	118661	770.322	218742	0.00352159	1.40462	0.00632299	1.79549	3.61116	2.15566	0.829866	0.792004	31.6714	2.29655	0.27692	2.15566	0.938652	4973.88	22.5078	1575.83	59.9925	3540.13	44.2326
204-01_DolFrac_97		1547.26	32355	26366.7	69849.4	990.492	164505	0.00602105	0.814314	0.0081302	1.35029	4.70462	1.53087	0.817456	1.36069	23.9467	2.04818	0.212557	1.53087	0.747429	4952.46	38.7059	1242.43	34.5061	3266.23	39.1614
204-01_DolFrac_98		2318.93	40937.1	35575.4	94671.2	2008.88	115895	0.0173336	1.0842	0.0164894	0.951297	2.57059	3.74569	0.848098	1.68075	45.4695	4.1055	0.389016	3.74569	0.91236	5004.74	47.7	2118.26	133.852	3897.85	78.4674
204-01_DolFrac_101		1672.03	33186.3	26148.4	69943.9	6060.36	182607	0.0331879	0.818796	0.0497449	1.49889	4.9858	2.24951	0.795812	1.73757	21.9979	2.84244	0.20057	2.24951	0.791403	4914.26	49.5112	1178.38	48.2712	3183.64	53.7644
204-01_DolFrac_102		577.216	11042.1	9648.42	23685.1	14333.5	34112.6	0.420181	0.281056	0.117653	0.280005	2.94132	3.37396	0.904324	3.97318	42.3728	5.21246	0.339983	3.37396	0.647287	5095.65	112.318	1886.59	109.435	3827.82	98.4786
204-01_DolFrac_103		592.011	11552.7	9323.42	23508.1	3125.16	88353.3	0.0353712	0.281111	0.0256521	0.725225	7.04641	2.27682	0.811531	2.32567	15.8724	3.25464	0.141916	2.27682	0.699561	4942.11	66.1862	855.489	36.3788	2869.15	60.3474
204-01_DolFrac_104		1462.15	28780.9	23490.7	59225.1	1329.69	183467	0.00724756	0.706172	0.0109144	1.50594	5.93862	1.56411	0.805397	0.910824	18.6909	1.80998	0.168389	1.56411	0.864157	4931.31	25.9336	1003.23	28.9978	3026	34.3038
204-01_DolFrac_105		2199.85	43657.1	35267.7	89070.2	1222.24	363447	0.00336292	1.06401	0.0100325	2.98326	7.66387	1.20737	0.792288	0.783006	14.2476	1.43904	0.130482	1.20737	0.83901	4907.94	22.3178	790.617	17.9421	2766.33	26.9463
204-01_DolFrac_106		14827.1	281633	238132	607793	3673.31	445058	0.00825354	7.14147	0.0301514	3.65315	1.43796	1.46583	0.836454	0.446425	80.1677	1.5323	0.695427	1.46583	0.956619	4985.11	12.6806	3403.29	77.0559	4464.15	30.2781
204-01_DolFrac_107		436.417	9115.6	7698.8	19925.7	21872	54509.1	0.401254	0.232696	0.179531	0.447423	5.64735	2.80165	0.842704	1.39127	20.5654	3.12807	0.177074	2.80165	0.895646	4995.68	39.5001	1050.97	54.1114	3118.33	58.8399
204-01_DolFrac_109		352.772	7156.22	5263.91	13558.2	11909.5	81149	0.146761	0.164536	0.0977562	0.666091	10.9122	2.12876	0.757612	1.70866	9.56842	2.72967	0.0916406	2.12876	0.779859	4844.06	48.8436	565.233	22.999	2394.14	48.9872
204-01_DolFrac_113		412.398	7145.34	5554.63	14238.9	2685.11	85319	0.0314714	0.170619	0.02204	0.700319	11.0413	1.81032	0.757941	1.48496	9.46065	2.34144	0.0905689	1.81032	0.773163	4844.68	42.4478	558.901	19.3543	2383.73	42.1179
204-01_DolFrac_114		508.536	9158.33	8048.68	19551.7	832.214	55631	0.0149595	0.232814	0.00683102	0.456633	5.65804	2.44762	0.827672	1.38652	20.1604	2.81306	0.17674	2.44762	0.870093	4970.12	39.4098	1049.14	47.223	3099.08	53.0183
204-01_DolFrac_116		369.92	6526.73	5730.92	12529.9	1165.76	42855.2	0.0272024	0.156994	0.00956886	0.351765	6.25219	2.782	0.878568	4.28134	19.3664	5.10582	0.159944	2.782	0.544868	5054.77	121.241	956.466	49.2691	3060.25	94.0981
204-01_DolFrac_118		3498.46	66079.9	56465	147510	1824.16	85710.4	0.0212828	1.71041	0.0149731	0.703532	1.20431	3.54564	0.846667	0.588423	96.8899	3.59413	0.830348	3.54564	0.986507	5002.34	16.7013	3896.9	204.115	4654.36	69.7886
204-01_DolFrac_119		bd	5895.74	4884.58	11779.5	1946.35	59662.7	0.0326226	0.142884	0.0159761	0.489726	9.4276	2.09913	0.833963	2.36166	12.1913	3.15971	0.106072	2.09913	0.664341	4980.87	67.0947	649.893	25.9018	2619.24	57.6349
204-01_DolFrac_120		426.057	10165.9	8170.82	20889.8	1021.17	69998.8	0.0145884	0.248444	0.00838201	0.574567	6.54741	3.35387	0.804122	1.17842	16.9262	3.55487	0.152732	3.35387	0.943457	4929.05	33.5561	916.261	57.0392	2930.66	65.9735
204-01_DolFrac_121		331.733	4855.29	3852.47	9552.36	2759.42	72294.3	0.0381693	0.115652	0.02265	0.593409	13.9574	1.78948	0.787046	1.54541	7.77146	2.36444	0.0716468	1.78948	0.756833	4898.47	44.0674	446.069	15.4064	2204.91	41.675
204-01_DolFrac_122		2372.29	40685.2	35099.3	89278.8	537.505	75552.9	0.00711428	1.04544	0.00441197	0.620156	1.68454	2.74023	0.850583	0.68034	69.5892	2.82342	0.593635	2.74023	0.970534	5008.89	19.3047	3004.14	130.278	4322.36	55.0076
204-01_DolFrac_123		21662.2	398070	340505	870107	1464.79	338764	0.00432393	10.1887	0.0120233	2.78065	0.799676	2.87831	0.849745	0.448792	146.447	2.91309	1.25051	2.87831	0.988061	5007.49	12.7353	5229.04	202.972	5070.28	57.1196
204-01_DolFrac_124		18358.6	342830	292289	744587	4128.23	363988	0.0113417	8.73847	0.0338855	2.98771	0.985685	1.12029	0.842645	0.430991	117.818	1.20033	1.01452	1.12029	0.933314	4995.58	12.2365	4514.96	72.3316	4851.09	23.8875
204-01_DolFrac_125		1600.37	33185.6	28624	68677	825.011	186490	0.00442388	0.826447	0.00677189	1.53076	5.2923	1.63723	0.831866	0.850249	21.6628	1.84485	0.188954	1.63723	0.887463	4977.3	24.1594	1115.7	33.4597	3168.73	35.1943
204-01_DolFrac_130		15375.2	289965	245903	628556	2756.78	377717	0.00729854	7.37496	0.0226283	3.10039	1.22248	1.14647	0.839718	0.468865	94.667	1.23864	0.818011	1.14647	0.925588	4990.64	13.3147	3853.3	66.1672	4631.03	24.5907
204-01_DolFrac_131		20815.5	376514	324730	829462	657.299	27188.4	0.0241757	9.69484	0.00539527	0.223169	0.067508	3.41974	0.855599	0.434296	1746.71	3.44721	14.8131	3.41974	0.992032	5017.23	12.3187	17797.5	400.328	7580.91	67.6596
204-01_DolFrac_133		bd	4083.72	3252.49	8219.48	2625.11	39070	0.0671899	0.0985231	0.0215475	0.320696	9.20941	1.7302	0.815183	1.4339	12.1991	2.24714	0.108585	1.7302	0.769954	4948.5	40.7956	664.523	21.8126	2619.84	41.3244
204-01_DolFrac_136		3213.88	59982.8	51516.3	131400	970.848	40565.8	0.0239327	1.53842	0.00796896	0.332974	0.650093	1.92909	0.853887	0.663025	181.022	2.03985	1.53824	1.92909	0.945702	5014.39	18.8088	6004.65	148.992	5284.18	40.3832
204-01_DolFrac_137		222216	4160775	3583828	9335788	1646.78	80984.2	0.0203346	108.18	0.0135172	0.664738	0.0188128	1.66305	0.853452	0.425623	6252.18	1.71665	53.1553	1.66305	0.968776	5013.67	12.0745	25733.2	207.093	8875.31	34.2707
204-01_DolFrac_138		13420.1	245814	208381	528057	1365.82	311029	0.0043913	6.22117	0.011211	2.553	1.1763	1.47585	0.839507	0.989275	98.3586	1.77673	0.850124	1.47585	0.830651	4990.28	28.0936	3966.17	86.8444	4669.48	35.1043
204-01_DolFrac_139		35794.2	677093	582915	1483503	1566.17	106370	0.0147237	17.3762	0.0128555	0.873112	0.144441	2.26768	0.85133	0.507478	812.296	2.32377	6.92326	2.26768	0.975863	5010.13	14.3989	13342.8	250.536	6804.18	46.0712
204-01_DolFrac_140		246504	4632446	3928392	10331110	1840.68	98286.2	0.0187277	119.654	0.0151087	0.806757	0.0188463	4.40617	0.851563	0.435614	6227.27	4.42765	53.0609	4.40617	0.995148	5010.52	12.3597	25721.9	534.765	8871.25	86.1413
204-01_DolFrac_141		3981.25	77671.6	65307.1	157441	1375.03	284164	0.00483885	1.90273	0.0112866	2.33249	3.47377	2.41452	0.849177	1.92803	33.6901	3.08985	0.287871	2.41452	0.781434	5006.54	54.7135	1630.88	69.2103	3601.01	59.1802
204-01_DolFrac_142		6063.84	114104	96061.5	245259	1022.24	117706	0.0086847	2.88447	0.00839078	0.966158	0.974242	3.23679	0.843262	1.20438	119.289	3.4536	1.02644	3.23679	0.937222	4996.62	34.1928	4552.97	207.988	4863.58	67.2729
204-01_DolFrac_144		2864.33	54816.8	46503.8	114782	1152.61	213998	0.00538606	1.3687	0.00946088	1.75655	3.64704	2.28454	0.834218	1.32419	31.5243	2.64057	0.274195	2.28454	0.86517	4981.31	37.6194	1562.06	63.0733	3535.55	50.6886
204-01_DolFrac_146		12508.6	238233	200824	510977	2278.46	393061	0.0057967	6.01711	0.0187021	3.22634	1.56289	1.0756	0.834662	0.511585	73.6016	1.19106	0.639839	1.0756	0.903058	4982.06	14.5334	3188.38	53.883	4378.5	23.5874
204-01_DolFrac_147		14220.4	270513	229551	585483	2070.44	365209	0.00566917	6.87539	0.0169946	2.99773	1.26783	1.79601	0.839483	0.500082	91.255	1.86433	0.78875	1.79601	0.963353	4990.24	14.2014	3748.7	101.305	4594.16	36.7757
204-01_DolFrac_148		21565.4	396166	339219	861140	1538.92	331563	0.00464143	10.1117	0.0126319	2.72155	0.790766	1.93892	0.846058	0.470426	147.455	1.99517	1.2646	1.93892	0.971806	5001.32	13.3528	5269.28	138.105	5077.2	39.4672
204-01_DolFrac_150		7911.65	147592	123042	313879	4789.51	371798	0.012882	3.70205	0.0393134	3.05181	2.28358	2.21637	0.827916	0.503526	49.9662	2.27285	0.437909	2.21637	0.975151	4970.54	14.3117	2341.27	86.4426	3991.64	44.2713
204-01_C1_02	low Pb	bd	44.9413	35.2533	58.1175	-0.583091	336.735	-0.0017316	0.000408299	-2.44684e-06	0.00141305	7.43985	10.4795	1.00092	17.5177	18.5413	20.4129	0.134411	10.4795	0.513374	5238.66	492.277	812.983	158.131	3018.26	332.444
204-01_C1_18	low Pb	bd	12.8518	8.81196	20.4543	-1.86916	56.7266	-0.0329503	9.17351e-05	-6.16568e-06	0.00018712	2.06207	56.565	-0.0807205	152.842	-5.39494	162.973	0.48495	56.565	0.347082	#NUM!	#NUM!	2548.79	2026.84	#VALUE!	#VALUE!
204-01_C1_19	low Pb	bd	26.7993	15.939	20.6045	-1.86916	88.154	-0.0212033	0.000137964	-6.16568e-06	0.000290788	2.9823	21.8793	0.258821	54.1929	11.9606	58.4429	0.335311	21.8793	0.374371	3239.54	1708.47	1864.07	672.066	2601.32	742.986
204-01_C1_25	low U	bd	80.0253	52.4753	147.082	-1.86916	23.8318	-0.0784314	0.000608945	-6.16568e-06	7.86124e-05	-0.377178	106.671	0.777547	20.5797	-284.11	108.638	-2.65126	106.671	0.981894	4881.16	587.291	#VALUE!	#VALUE!	#VALUE!	#VALUE!
204-01_C1_01		bd	103.075	59.3031	143.039	13.3514	3420.44	0.0039034	0.000901594	5.60266e-05	0.0143533	31.8673	6.46815	0.545095	11.7454	2.3574	13.4087	0.0313801	6.46815	0.482386	4368.05	343.846	199.18	25.3228	1229.8	175.176
204-01_C1_02		bd	3411.09	2903.89	7508.23	-0.583091	594.481	-0.000980841	0.0408063	-2.44684e-06	0.00249463	0.163688	11.545	0.847141	2.20711	713.257	11.7541	6.10919	11.545	0.982212	5003.14	62.6426	12643.9	1166.84	6672.33	214.115
204-01_C1_03		bd	304.943	278.906	761.564	-0.583091	153.126	-0.0038079	0.00397168	-2.44684e-06	0.000642568	0.451975	5.26044	0.916922	4.21374	279.591	6.74002	2.21251	5.26044	0.780479	5115.19	119.02	7523.31	450.954	5723.61	127.972
204-01_C1_04		bd	2549.64	2191.07	5561.55	-0.583091	603.191	-0.000966677	0.0304124	-2.44684e-06	0.00253118	0.205849	7.51434	0.869232	1.42541	581.958	7.64834	4.85792	7.51434	0.98248	5039.64	40.3919	11395.9	757.166	6466.08	144.297
204-01_C1_05		bd	1937.01	1683.6	4315.38	-0.583091	984.411	-0.000592325	0.0234272	-2.44684e-06	0.00413091	0.470521	5.86692	0.854542	1.75751	250.3	6.1245	2.1253	5.86692	0.957941	5015.48	49.8552	7345.89	494.891	5611.66	116.886
204-01_C1_06		bd	153.72	138.905	302.564	-0.583091	85.7657	-0.00679865	0.00175701	-2.44684e-06	0.000359901	0.391135	10.7586	0.864822	6.6898	304.724	12.6689	2.55666	10.7586	0.849213	5032.43	189.629	8179.36	927.106	5810.71	228.644
204-01_C1_07		bd	934.219	792.167	1960.53	-0.583091	334.477	-0.00174329	0.0108838	-2.44684e-06	0.00140357	0.322094	5.85972	0.842073	2.22404	360.307	6.26759	3.10469	5.85972	0.934924	4994.62	63.1466	9103.17	547.507	5980.33	119.599
204-01_C1_08		bd	350.518	298.698	800.107	12.1153	259.164	0.0467478	0.00427842	5.08398e-05	0.00108754	0.680194	10.2651	0.840635	4.60616	170.326	11.2511	1.47017	10.2651	0.912357	4992.19	130.796	5829.41	743.151	5222.69	204.992
204-01_C1_09		bd	2240.43	1935.07	4518.55	8.14707	218.841	0.0372283	0.0256649	3.41878e-05	0.000918328	0.0929563	7.67234	0.842044	2.93291	1248.42	8.21381	10.7577	7.67234	0.934078	4994.57	83.2737	15887.3	846.902	7240.13	154.325
204-01_C1_11		bd	463.158	399.939	916.946	7.50585	1408.06	0.00533062	0.00387702	2.47591e-05	0.00464468	3.72139	10.3802	0.746885	4.47477	27.6601	11.3037	0.268716	10.3802	0.918307	4823.67	128.037	1534.28	277.401	3407.12	200.398
204-01_C1_12		bd	1131.45	954.488	2477.1	5.16209	854.938	0.00603798	0.00993853	1.70279e-05	0.00282013	0.467518	17.1418	0.845561	2.90985	249.26	17.387	2.13895	17.1418	0.985896	5000.49	82.5974	7373.98	1353.42	5607.45	301.972
204-01_C1_13		bd	833.685	690.195	1791.17	7.65466	1166.4	0.00656263	0.00722035	2.52499e-05	0.00384753	0.958861	11.9145	0.866946	3.28349	124.607	12.3587	1.0429	11.9145	0.964061	5035.91	93.0598	4605.14	740.041	4907.51	222.675
204-01_C1_14		bd	335.711	282.302	754.261	14.7975	370.581	0.0399306	0.00298888	4.88116e-05	0.00122241	2.25882	16.0255	0.709061	10.4961	43.2622	19.1568	0.44271	16.0255	0.836542	4749.19	301.38	2362.76	604.742	3848.43	322.969
204-01_C1_15		bd	87.1323	81.6689	199.784	-1.86916	57.3564	-0.0325885	0.000802796	-6.16568e-06	0.000189198	0.635279	8.77267	1.13013	10.7371	245.171	13.8653	1.57411	8.77267	0.632708	5408.68	299.716	6095.11	657.006	5590.73	247.622
204-01_C1_16		bd	145.311	117.564	292.336	-1.86916	969.328	-0.0019283	0.00120928	-6.16568e-06	0.00319746	4.88926	13.197	0.771921	7.61144	21.7588	15.2347	0.20453	13.197	0.866248	4870.79	217.314	1199.61	282.623	3173.03	259.586
204-01_C1_17		bd	265.102	222.662	508.317	-1.86916	1733.25	-0.00107842	0.00216952	-6.16568e-06	0.00571735	7.06529	8.00524	0.726386	6.48939	14.1691	10.3051	0.141537	8.00524	0.77682	4783.82	186.028	853.348	126.715	2761.09	178.774
204-01_C1_20		bd	1111.92	905.644	2294	5.2737	840.382	0.00627537	0.0093908	1.7396e-05	0.00277211	0.773197	4.16793	0.820755	2.10848	146.295	4.6709	1.29333	4.16793	0.892318	4958.19	59.9622	5350.56	296.141	5069.24	90.0934
204-01_C1_21		bd	645.235	550.097	1405.85	-1.86916	263.423	-0.00709566	0.0056655	-6.16568e-06	0.000868937	0.403076	4.7348	0.842697	3.22304	288.131	5.72768	2.48092	4.7348	0.826652	4995.67	91.507	8040.59	421.026	5754.05	109.761
204-01_C1_22		bd	3619.86	3983.1	9945.92	-1.86916	572.549	-0.00326463	0.0382223	-6.16568e-06	0.00188863	0.178427	9.66082	0.836874	1.4879	646.406	9.77473	5.60453	9.66082	0.988347	4985.82	42.2621	12169.3	978.753	6572.55	181.05
204-01_C1_23		bd	3153.09	2704.4	6896.74	-1.86916	919.665	-0.00203244	0.0277794	-6.16568e-06	0.00303364	0.264428	2.8247	0.846621	1.09482	441.254	3.02944	3.78175	2.8247	0.932414	5002.26	31.0745	10087.4	281.773	6185.6	59.598
204-01_C1_24		bd	718.089	612.129	1504.66	-1.86916	255.285	-0.00732187	0.00617451	-6.16568e-06	0.000842091	0.341906	3.8611	0.84911	3.47478	342.265	5.19444	2.92478	3.8611	0.743315	5006.43	98.6075	8814.24	360.687	5928.32	100.081
204-01_C1_26		bd	384.867	350.86	865.121	-1.86916	119.8	-0.0156024	0.00348673	-6.16568e-06	0.000395176	0.310416	7.38069	0.943707	3.88861	418.986	8.34242	3.22149	7.38069	0.884719	5155.82	109.65	9284.04	688.1	6133.14	156.334
204-01_C1_27		857.884	15648.9	13358.8	34316.4	6.861	947.417	0.0072418	0.137923	2.2632e-05	0.00312518	0.0597153	8.46293	0.847773	0.813824	1956.59	8.50197	16.7461	8.46293	0.995408	5004.19	23.097	18541	955.225	7696.07	159.378
204-01_C1_28		bd	402.611	314.022	858.334	4.48005	1093.26	0.00409788	0.00343036	1.47781e-05	0.00360627	3.57366	7.1906	0.784099	6.20225	30.2388	9.49593	0.279826	7.1906	0.75723	4893.12	176.9	1590.48	199.577	3494.6	171.359
204-01_C1_29		bd	669.711	596.836	1508.35	10.0356	391.374	0.025642	0.00604386	3.31038e-05	0.001291	0.546473	4.67131	0.921423	3.46086	232.379	5.81366	1.82992	4.67131	0.803506	5122.11	97.7258	6705.86	378.133	5536.54	111.234
204-01_C1_30		bd	896.847	741.99	1791.59	-1.86916	157.029	-0.0119033	0.00747165	-6.16568e-06	0.000517981	0.157533	8.38185	0.855204	2.80716	748.178	8.83943	6.34789	8.38185	0.948234	5016.57	79.6266	12856.8	871.876	6720.8	165.09
204-01_C1_31		bd	969.412	807.272	2072.51	-1.86916	420.638	-0.00444363	0.00838373	-6.16568e-06	0.00138753	0.378821	14.7588	0.891269	3.58288	324.25	15.1874	2.63977	14.7588	0.971775	5075.08	101.374	8328.25	1250.51	5873.58	268.597
204-01_C1_32		bd	978.119	819.592	2098.3	10.4116	685.111	0.0151969	0.0084857	3.43439e-05	0.00225993	0.73123	11.7522	0.803405	3.4289	151.421	12.2422	1.36756	11.7522	0.959974	4927.79	97.6456	5555.9	820.682	5103.97	221.068
204-01_C1_34		388.962	8973.33	6438.88	16167.8	46.6996	133604	0.000349539	0.10362	0.000186828	0.534498	13.2774	3.28998	0.715754	1.63647	7.42946	3.6745	0.0753161	3.28998	0.895353	4762.67	46.9586	468.104	29.6411	2164.53	63.726
204-01_C1_35		1419.85	28306.9	23786.4	60228.7	54.5121	66151.2	0.000824053	0.368548	0.000218083	0.264647	2.15725	3.22759	0.836619	0.86907	53.4483	3.34255	0.463554	3.22759	0.965608	4985.39	24.6853	2455.23	130.472	4058.74	64.5375
204-01_C1_36		1809.65	36072.3	30749.2	76905.9	27.6024	78458.2	0.00035181	0.471595	0.000110427	0.313882	1.93179	7.40171	0.848669	0.827581	60.546	7.44783	0.517656	7.40171	0.993807	5005.69	23.4859	2689.23	317.547	4183.16	138.849
204-01_C1_37		1741.66	31865.5	25638.4	66719.4	49.8246	183958	0.000270848	0.407599	0.00019933	0.735948	4.96384	4.94368	0.799289	0.763239	22.1918	5.00225	0.201457	4.94368	0.988291	4920.47	21.7421	1183.14	105.998	3192.16	92.8282
204-01_C1_38		bd	2873.78	2082.24	4825.96	8.69554	41983.1	0.00020712	0.0320964	3.47876e-05	0.167959	10.7967	10.5387	0.699447	3.86651	8.92834	11.2256	0.0926211	10.5387	0.938809	4729.58	111.125	571.02	114.163	2330.7	186.732
204-01_C1_39		bd	4303.79	2982.2	7332.8	31.8246	79196.9	0.000401841	0.0479668	0.000127318	0.316838	16.2711	7.16886	0.686636	1.76247	5.81587	7.38233	0.0614585	7.16886	0.971083	4703	50.719	384.49	53.2943	1948.78	120.483
204-01_C1_40		bd	639.953	227.225	488.275	14.8246	33378.6	0.000444134	0.00444748	5.93076e-05	0.133535	47.4902	3.57439	0.34847	6.06558	1.01127	7.04042	0.021057	3.57439	0.507696	3700.32	184.899	134.333	9.49678	709.515	69.457
204-01_C1_41		3291.32	60022.4	52112.1	132213	12.0197	10726.3	0.00112059	0.801748	4.80863e-05	0.0429118	0.159239	6.77542	0.861555	0.644345	745.657	6.80599	6.27987	6.77542	0.995508	5027.06	18.2688	12796.9	712.663	6717.37	129.419
204-01_C1_42		bd	2685.66	771.318	1772.16	19.8246	161240	0.000122951	0.0171577	7.93108e-05	0.645063	52.9519	2.49928	0.284612	3.85036	0.740759	4.59039	0.0188851	2.49928	0.544459	3388.41	120.007	120.606	5.96973	562.848	38.9134
204-01_C1_43		bd	3248.86	2156.39	5451.77	15.3418	64053.3	0.000239516	0.0356238	6.13769e-05	0.256253	17.3726	5.15332	0.659387	3.03006	5.23095	5.97813	0.0575618	5.15332	0.862029	4644.65	87.4458	360.781	36.0619	1857.67	97.1216
204-01_C1_44		bd	1987.11	1431.35	3565.52	14.4079	46065.1	0.000312773	0.0229157	5.76407e-05	0.18429	21.3705	5.44792	0.655007	4.95835	4.22412	7.36648	0.0467934	5.44792	0.739555	4635.04	143.163	294.805	31.3218	1678.72	114.281
204-01_C1_45		bd	2452.44	1202.2	2757.65	56.0746	100402	0.000558499	0.0210399	0.000224334	0.401673	37.5227	2.72033	0.50251	4.57547	1.84568	5.32307	0.0266505	2.72033	0.511045	4248.59	134.832	169.551	9.098	1061.89	67.7974
204-01_C1_46		493.412	11391.2	6749.25	17578.8	105.594	322079	0.000327851	0.117201	0.000422443	1.28852	24.8173	5.194	0.61353	2.13303	3.40713	5.61493	0.0402945	5.194	0.925034	4540.37	61.881	254.658	25.8862	1506.04	84.5343
204-01_C1_47		3065.59	60224.4	50109	129146	374.417	38418.9	0.00974564	0.785775	0.0014979	0.1537	0.571215	3.3807	0.851295	0.74453	205.393	3.46172	1.75065	3.3807	0.976597	5010.08	21.125	6522.73	271.605	5411.77	67.654
204-01_C1_48		5910.85	110302	92162.1	233776	5358.91	46206.3	0.115978	1.43138	0.021439	0.184854	0.389874	1.89398	0.858968	0.556319	303.639	1.974	2.56493	1.89398	0.959466	5022.8	15.776	8194.32	173.339	5807.11	39.1896
204-01_C1_49		898.722	17118.1	15372.1	39026.4	19.5216	52950.4	0.000368676	0.234658	7.80985e-05	0.211835	2.64628	3.85052	0.858695	1.03593	44.7208	3.98744	0.377889	3.85052	0.965663	5022.35	29.3774	2066.42	134.732	3881.36	76.267
204-01_C1_50		bd	2254.85	1690.34	4234.08	13.8871	617.867	0.0224758	0.0268376	5.5557e-05	0.00247186	0.253595	7.7986	0.853879	1.96192	464.047	8.0416	3.9433	7.7986	0.969782	5014.37	55.6562	10301.6	755.953	6236.62	151.129
204-01_C1_51		699.981	13881.3	11749.4	29687.5	84.6073	58985.7	0.00143437	0.181509	0.000338482	0.23598	3.77247	2.46047	0.855444	1.18163	31.2516	2.7295	0.265079	2.46047	0.901436	5016.97	33.5171	1515.77	66.1293	3527	52.3387
204-01_C1_52		bd	300.416	267.006	637.486	31.4913	3397.32	0.00926944	0.00395352	0.000125985	0.0135914	9.98293	7.8162	0.924247	8.71218	12.7596	11.7045	0.100171	7.8162	0.667795	5126.43	245.965	615.411	91.1072	2662.06	199.474
204-01_C1_53		670.72	15165.7	12873.2	32600	15.3801	6495.04	0.00236798	0.198967	6.15302e-05	0.0259843	0.259854	13.0215	0.850769	0.694641	451.219	13.04	3.84831	13.0215	0.99858	5009.2	19.7102	10176.5	1211.29	6208.22	234.847
204-01_C1_54		bd	278.86	218.794	551.275	12.3246	1002.73	0.012291	0.00344172	4.9306e-05	0.00401156	3.49247	4.96882	0.838805	6.38595	33.1005	8.09132	0.28633	4.96882	0.614092	4989.1	181.359	1623.16	141.045	3583.6	148.145
204-01_C1_55		bd	445.969	401.831	969.546	-0.175439	2624.19	-6.68544e-05	0.00596303	-7.01865e-07	0.0104984	5.65675	8.28353	0.868703	4.71494	21.1646	9.53139	0.17678	8.28353	0.869078	5038.78	133.613	1049.36	158.472	3146.16	169.804
204-01_C1_56		45127.9	816777	734249	1872019	178.992	233546	0.00076641	11.2316	0.00071608	0.93433	0.274789	9.83549	0.854175	0.538453	428.403	9.85022	3.63915	9.83549	0.998505	5014.87	15.2746	9892.22	925.065	6155.65	182.199
204-01_C1_57		46157.5	860902	744745	1904687	189.014	193834	0.000975136	11.518	0.000756177	0.775458	0.190328	7.83701	0.859426	0.449536	622.317	7.84989	5.25409	7.83701	0.998359	5023.56	12.7475	11817.8	797.432	6534.05	147.851
204-01_C1_58		6851.77	125772	108539	276304	252.528	106075	0.00238065	1.67542	0.00101027	0.424368	0.750851	3.92472	0.85903	0.488117	157.674	3.95496	1.33182	3.92472	0.992355	5022.9	13.8419	5457.86	282.716	5144.8	76.8285
204-01_C1_59		18947.2	345879	298701	757272	9958.54	51119.2	0.19481	4.59972	0.0398404	0.204509	0.129037	6.34574	0.859829	0.478615	918.342	6.36376	7.74973	6.34574	0.997168	5024.22	13.5717	13982.4	686.728	6928.63	121.522
204-01_Line1-4_01		11482.3	207535	178796	458558	2218.77	45212.8	0.049074	2.51433	0.0091455	0.186361	0.231269	3.12736	0.856322	0.204993	510.301	3.13408	4.32398	3.12736	0.997859	5018.43	5.81427	10779.8	319.426	6332.9	61.6135
204-01_Line1-4_02		11276.3	212202	181181	500270	1681.91	53132.3	0.0316552	2.65945	0.00693262	0.219004	0.227603	5.5903	0.85682	0.240759	518.821	5.59549	4.39361	5.5903	0.999074	5019.25	6.82846	10863.6	561.902	6349.68	107.514
204-01_Line1-4_03		3809.64	69266.1	61324.1	153501	46.967	7735.3	0.00607177	0.845437	0.000193592	0.0318839	0.102033	3.98719	0.864413	0.315293	1167.58	3.99963	9.80076	3.98719	0.996888	5031.76	8.93755	15340	450.362	7172.2	78.0737
204-01_Line1-4_04		bd	655.164	572.551	1398.49	10.2482	654.116	0.0156672	0.0078154	4.22416e-05	0.00269618	0.839576	8.45446	0.860768	3.20518	141.297	9.04163	1.19108	8.45446	0.935059	5025.77	90.8801	5056.53	566.868	5034.18	167.683
204-01_Line1-4_05		bd	541.727	352.599	870.745	7.76019	75.4413	0.102864	0.00525273	3.19865e-05	0.000310959	0.136187	8.35117	0.884382	3.51759	894.975	9.06176	7.34286	8.35117	0.921584	5064.11	99.5732	13675.5	884.144	6902.49	168.949
204-01_Line1-4_06		bd	5782.9	5116.78	12866.4	81.5941	2165.99	0.0376706	0.0707261	0.00033632	0.00892793	0.347704	2.18175	0.861851	0.856068	341.609	2.34369	2.87601	2.18175	0.930904	5027.55	24.2712	8733.64	205.41	5926.37	46.3804
204-01_Line1-4_07		8892.09	158398	135364	357392	27.1009	2221.14	0.0122013	1.93779	0.000111706	0.00915526	0.0130325	5.21353	0.850158	0.279162	8990.39	5.221	76.7313	5.21353	0.99857	5008.18	7.92149	28062.9	631.552	9244.07	100.837
204-01_Line1-4_08		bd	923.11	672.719	1980.79	11.2278	389.685	0.0288125	0.0106438	4.62797e-05	0.00160623	0.384049	5.95461	0.851552	1.65584	305.584	6.18055	2.60383	5.95461	0.963444	5010.5	46.9812	8264.29	532.112	5813.57	117.976
204-01_Line1-4_09		7814.87	142598	122657	313444	45.4045	8124.71	0.00558845	1.72217	0.000187151	0.033489	0.0583371	4.73592	0.855546	0.235973	2021.18	4.74179	17.1418	4.73592	0.998761	5017.14	6.69335	18683.1	552.564	7729.03	91.9547
204-01_Line1-4_10		bd	1282.9	1138.44	2797.07	23.5294	3661.43	0.0064263	0.0155297	9.69853e-05	0.0150919	2.6608	3.47067	0.866051	2.08637	44.8578	4.04951	0.375827	3.47067	0.85706	5034.44	59.1351	2056.76	121.088	3884.39	77.4152
204-01_Line1-4_11		349.412	4202.52	3995.54	10107.4	62.9235	1832.37	0.03434	0.0544757	0.000259362	0.00755278	0.358043	8.88956	0.858205	1.10791	330.34	8.95833	2.79296	8.88956	0.992323	5021.54	31.4196	8594.01	793.096	5892.42	166.877
204-01_Line1-4_12		735.071	11025.2	9415.78	24093.9	96.1859	7295.55	0.0131842	0.132533	0.000396466	0.0300713	0.608898	3.69382	0.853487	0.919274	193.178	3.80649	1.64231	3.69382	0.9704	5013.72	26.0789	6263.68	289.408	5349.83	74.1298
204-01_Line1-4_13		328.292	5709.03	4862.15	12611.9	51.7041	3958.95	0.01306	0.0689912	0.000213118	0.0163183	0.68502	2.68928	0.846569	0.810165	170.32	2.80866	1.45981	2.68928	0.957494	5002.18	22.9952	5802.32	202.552	5222.65	55.1776
204-01_Line1-4_14		bd	916.528	799.107	1891.13	22.3756	1232.3	0.0181577	0.0107335	9.22293e-05	0.00507936	0.95794	8.16292	0.875288	1.94119	125.927	8.39056	1.04391	8.16292	0.97287	5049.47	54.9843	4608.3	516.282	4918.12	156.367
204-01_Line1-4_15		476.762	9567.17	8308.87	20572.3	27.5617	1852.32	0.0148795	0.11442	0.000113606	0.00763503	0.191834	5.47478	0.866373	0.795462	622.422	5.53227	5.21284	5.47478	0.989609	5034.97	22.5456	11775.1	566.597	6534.22	106.393
204-01_Line1-4_16		47860.8	891742	768973	1976371	656.349	44060.6	0.0148965	10.8237	0.00270539	0.181612	0.0472184	3.76481	0.857757	0.196364	2503.57	3.76993	21.1782	3.76481	0.998643	5020.8	5.56893	19978.1	447.6	7946.26	73.7812
204-01_Line1-4_17		1107.65	22645.6	19285.4	50378.9	183.686	22172.7	0.00828436	0.274708	0.000757131	0.0913928	0.941218	2.55675	0.85246	0.632129	124.822	2.63374	1.06245	2.55675	0.97077	5012.02	17.9342	4666.54	167.612	4909.24	51.7201
204-01_Line1-4_18		bd	1069.37	948.601	2287.14	6.46593	179.504	0.036021	0.0128117	2.66517e-05	0.000739893	0.153438	3.98452	0.875092	1.99069	786.008	4.45413	6.51729	3.98452	0.894568	5049.16	56.3872	13003.7	430.667	6770.82	86.5428
204-01_Line1-4_19		3913.63	69031	59458	152116	1343.01	31762.2	0.0422831	0.835061	0.00553569	0.13092	0.445442	1.42225	0.855202	0.254142	264.596	1.44478	2.24496	1.42225	0.984407	5016.57	7.20888	7588.09	125.628	5667.84	28.8168
204-01_Line1-4_20		676.853	12665.4	10781	28637	116.499	4639.2	0.0251118	0.154997	0.000480192	0.0191222	0.360967	2.70257	0.848571	0.589356	323.986	2.76609	2.77034	2.70257	0.977038	5005.53	16.7255	8555.45	251.069	5872.75	54.5102
204-01_Line1-4_21		1605.11	29734.2	25515	65807.3	164.936	3620.49	0.0455563	0.360256	0.000679846	0.0149232	0.116352	2.00439	0.848109	0.469395	1004.58	2.05861	8.59459	2.00439	0.973658	5004.76	13.3215	14576.6	227.428	7019.66	40.928
204-01_Line1-4_22		624.24	11482.5	10113	25353.4	66.7835	3331.82	0.0200441	0.139717	0.000275273	0.0137333	0.26507	2.90244	0.865753	0.694552	450.131	2.98439	3.77259	2.90244	0.972542	5033.95	19.6865	10075	289.214	6205.78	58.7394
204-01_Line1-4_23		6333.44	111265	92254.8	247901	115.453	10223.2	0.0112932	1.3434	0.000475881	0.0421387	0.0885364	4.15761	0.862832	0.269574	1343.1	4.16634	11.2948	4.15761	0.997905	5029.16	7.64243	16175.2	474.533	7314.3	81.2099
204-01_Line1-4_24		7175.74	131592	113295	289976	153.217	7164.37	0.021386	1.59172	0.000631542	0.0295306	0.0516838	4.46511	0.85397	0.262937	2277.16	4.47285	19.3484	4.46511	0.998271	5014.53	7.45901	19423.1	525.385	7850.05	86.9607
204-01_Line1-4_25		5322.87	93619.9	80466.9	208780	58.3656	1244.53	0.0468978	1.13939	0.000240575	0.00512978	0.0124346	5.41461	0.852814	0.290518	9452.12	5.42239	80.4209	5.41461	0.998564	5012.6	8.24213	28361.8	655.081	9294.92	104.534
204-01_Line1-4_26		868.613	13583.7	11700.7	29903.2	45.2508	2192.7	0.020637	0.164235	0.000186518	0.00903803	0.156099	1.40183	0.856712	0.54206	756.38	1.50298	6.40618	1.40183	0.932698	5019.07	15.3741	12907.7	154.466	6731.85	30.0331
204-01_Line1-4_27		970.491	17771.2	15310.5	40625.8	49.2987	2315.59	0.0212899	0.219349	0.000203203	0.00954455	0.122186	2.00431	0.852636	0.53376	961.722	2.07416	8.18427	2.00431	0.966322	5012.31	15.1432	14294.9	226.258	6975.44	41.2292
204-01_Line1-4_28		bd	5023.93	4395.4	11183	41.6064	485.81	0.0856433	0.0613113	0.000171496	0.00200245	0.0904835	2.27495	0.857055	1.11132	1305.4	2.53189	11.0517	2.27495	0.898521	5019.64	31.5191	16046.5	263.509	7285.41	50.1198
204-01_Line1-4_29		1303.35	23426.1	20332.4	52288.5	268.531	22472.7	0.0119492	0.285829	0.00110685	0.0926296	0.926618	2.55708	0.854239	0.545935	127.053	2.61471	1.07919	2.55708	0.97796	5014.97	15.4868	4718.65	168.887	4927.09	51.3626
204-01_Line1-4_30		594.019	12627	10626.7	27283.6	232.905	5873.16	0.0396559	0.150395	0.000960006	0.0242084	0.452168	2.32478	0.839038	0.656413	255.734	2.41567	2.21157	2.32478	0.962373	4989.49	18.6416	7521.42	203.166	5633.39	47.7262
204-01_Line1-4_31		2048.29	37778.1	32440	80964.4	173.927	11662	0.0149139	0.449909	0.000716904	0.0480694	0.308176	3.53667	0.851672	0.422187	380.872	3.56178	3.2449	3.53667	0.99295	5010.7	11.9786	9319.7	339.462	6036.54	69.6945
204-01_Line1-4_32		803.884	12059.3	10436.3	26506.3	117.577	3708.77	0.0317025	0.145826	0.000484639	0.0152871	0.298232	2.97393	0.860356	0.622989	397.585	3.03848	3.35309	2.97393	0.978755	5025.09	17.6648	9481.94	288.777	6080.03	59.7563
204-01_Line1-4_33		320.566	4720.94	4163.01	10604.3	77.7603	2777.75	0.027994	0.0579957	0.000320518	0.0114495	0.569864	4.05191	0.868055	1.01007	209.934	4.17591	1.75481	4.05191	0.970306	5037.72	28.6248	6532.45	324.467	5433.87	81.0761
204-01_Line1-4_34		13749.7	263556	227222	575847	253.292	20789.2	0.0121838	3.1742	0.00104404	0.0856905	0.0763997	4.23264	0.855322	0.249727	1542.92	4.24	13.0891	4.23264	0.998264	5016.77	7.08357	17053.3	488.026	7455.02	82.5963
204-01_Line1-4_35		640.269	8947.23	7747.17	19617.5	70.4045	1645.24	0.042793	0.108062	0.000290198	0.00678145	0.179944	2.41399	0.85893	0.746127	657.85	2.52667	5.55729	2.41399	0.955404	5022.74	21.1586	12123	258.515	6590.34	49.9822
204-01_Line1-4_36		1303.38	22467.3	19485.5	49410.6	151.704	4684.88	0.0323818	0.271891	0.000625306	0.0193104	0.180985	4.02247	0.853899	0.463246	650.236	4.04905	5.52533	4.02247	0.993434	5014.41	13.1415	12091.5	424.823	6578.54	78.9501
204-01_Line1-4_37		436586	8587799	7378998	19176640	602.572	16792.5	0.0358834	104.585	0.00248373	0.0692166	0.00205382	3.13903	0.854864	0.309795	57364.1	3.15428	486.897	3.13903	0.995165	5016.01	8.78772	39904	391.734	11125.7	62.1157
204-01_Line1-4_38		957.466	19426.2	17182.3	41883.8	89.9358	2557.86	0.0351605	0.233588	0.000370704	0.0105432	0.128571	3.00924	0.858546	1.20272	920.293	3.24069	7.7778	3.00924	0.928581	5022.1	34.1075	14003.1	334.923	6930.78	63.6988
204-01_Line1-4_39		638.849	12172.1	10235.3	25540.6	40.717	52584.8	0.00077431	0.14269	0.00016783	0.216748	4.02627	3.58022	0.817222	0.768991	27.9733	3.66187	0.248369	3.58022	0.977702	4952.05	21.875	1430.06	91.1879	3418.16	69.3727
204-01_Line1-4_40		806.476	15721.9	13269.3	33304.6	71.6065	61657.9	0.00116135	0.185388	0.000295153	0.254146	3.22684	6.60959	0.820005	0.690312	35.0224	6.64554	0.309901	6.60959	0.99459	4956.89	19.6326	1740.22	198.519	3639.27	123.398
204-01_Line1-4_41		1711.2	33434.4	28471.9	72831.1	54.0851	77211.5	0.000700479	0.40097	0.000222932	0.318256	2.06417	3.48925	0.84914	0.457799	56.6942	3.51915	0.484455	3.48925	0.991502	5006.48	12.9914	2546.64	145.167	4117.54	67.9049
204-01_Line1-4_42		6819.76	128089	105881	283795	53.4475	13571.6	0.00393819	1.54083	0.000220304	0.0559404	0.108188	11.6655	0.852602	0.289416	1086.1	11.6691	9.24314	11.6655	0.999692	5012.25	8.21098	14998.3	1231.66	7098.82	212.81
204-01_Line1-4_43		16754.1	304564	264578	675625	61.0295	11898.8	0.00512906	3.70435	0.000251556	0.0490452	0.0374261	2.8694	0.854207	0.280827	3145.54	2.8831	26.7194	2.8694	0.995245	5014.92	7.96637	21415.8	347.086	8177.95	56.9057
204-01_Line1-4_44		47916	893213	767289	1966460	101.607	72474.8	0.00140196	10.7936	0.000418809	0.298732	0.0823726	7.03025	0.853591	0.278484	1428.15	7.03577	12.14	7.03025	0.999216	5013.9	7.90028	16603.8	787.321	7376.59	133.593
204-01_Line1-4_45		8082.02	152528	130656	334644	105.561	143830	0.000733927	1.83862	0.000435108	0.592849	0.903121	2.45172	0.851423	0.247654	129.929	2.46419	1.10727	2.45172	0.994937	5010.29	7.02676	4805.12	163.99	4949.64	48.4836
204-01_Line1-4_46		81082.2	1490742	1277079	3334481	323.147	18415	0.017548	18.16	0.00133197	0.0759043	0.0115178	2.57751	0.857179	0.212962	10256.7	2.58629	86.8221	2.57751	0.996604	5019.85	6.03992	28849.7	320.432	9377.86	51.2034
204-01_Line1-4_47		909.247	17377.4	14974.6	38262.6	139.299	4441.52	0.0313629	0.210144	0.000574172	0.0183074	0.241215	1.63801	0.854399	0.638821	488.161	1.75817	4.14568	1.63801	0.931655	5015.24	18.1215	10560.2	167.938	6287.95	35.0205
204-01_Line1-4_48		529.267	10597.8	8739.75	24335.7	49.3107	2204.2	0.0223713	0.129969	0.000203252	0.00908543	0.221026	4.52196	0.847276	0.806435	528.308	4.59331	4.52435	4.52196	0.984467	5003.36	22.8882	11018	460.619	6368.05	89.0789
204-01_Line1-4_49		3203.11	57940.1	49549.2	125954	69.6233	5996.97	0.0116097	0.694713	0.000286978	0.0247187	0.0994934	3.69918	0.851676	0.41189	1179.74	3.72204	10.0509	3.69918	0.993858	5010.71	11.6865	15487.6	419.8	7182.71	72.8452
204-01_Line1-4_50		22320.1	411999	356113	911699	101.704	10182.1	0.00998857	4.99901	0.000419212	0.0419692	0.0253272	6.83572	0.858779	0.236916	4673.05	6.83982	39.4833	6.83572	0.9994	5022.49	6.71851	23857.5	806.876	8579.76	130.16
204-01_Line1-4_51		2294.45	40447.7	34299.8	87991	77.5618	2056.8	0.03771	0.484299	0.0003197	0.00847785	0.0482709	3.72136	0.851432	0.510967	2430.92	3.75628	20.7164	3.72136	0.990705	5010.3	14.4978	19842.5	442.178	7916.37	73.5226
204-01_Line1-4_52		800.206	16564.4	14347.6	36236.4	68.2265	6654.38	0.0102529	0.199829	0.000281221	0.0274285	0.391067	1.64381	0.859557	0.624391	302.921	1.7584	2.55711	1.64381	0.934832	5023.77	17.7056	8180.16	150.581	5804.71	34.982
204-01_Line1-4_53		bd	2529.32	2149.56	5345.66	22.723	3309.51	0.00686595	0.0298324	9.36612e-05	0.0136414	1.23965	3.16442	0.842948	1.49619	93.7144	3.50031	0.806677	3.16442	0.904042	4996.09	42.4782	3812.98	179.637	4620.87	68.0036
204-01_Line1-4_54		1879.41	34168.7	29906.5	76646.5	129.175	5483.68	0.0235562	0.418778	0.000532442	0.022603	0.158556	1.89548	0.860405	0.456365	747.87	1.94964	6.30692	1.89548	0.972218	5025.17	12.9402	12820.8	207.558	6720.38	38.7894
204-01_Line1-4_55		820.377	16369.4	14078.4	35903	67.2795	5689.52	0.0118252	0.197456	0.000277317	0.0234515	0.340001	1.8835	0.846279	0.534958	343.036	1.958	2.94117	1.8835	0.961953	5001.69	15.1842	8841.12	178.721	5930.59	38.8924
204-01_Line1-4_56		426.969	5774.11	4946.27	12546	17.3819	6518.66	0.00266648	0.0692393	7.16459e-05	0.0268691	1.11479	4.44942	0.852432	0.682625	105.383	4.50148	0.897027	4.44942	0.988435	5011.97	19.3669	4127.56	265.707	4738.84	86.7423
204-01_Line1-4_57		3819.15	69540.3	60415.2	154502	140.717	17827.3	0.00789334	0.846528	0.000580018	0.073482	0.233591	3.9797	0.857685	0.247424	506.032	3.98739	4.28099	3.9797	0.998073	5020.68	7.01705	10727.6	403.069	6324.39	77.7598
204-01_Line1-4_58		4466.61	84547.3	72415.3	185007	157.26	7048.24	0.022312	1.01768	0.000648206	0.0290519	0.0734855	7.61851	0.855852	0.386135	1605.1	7.62829	13.6081	7.61851	0.998718	5017.65	10.9524	17286.6	855.622	7495.12	144.091
204-01_Line1-4_59		bd	3707.12	3241.92	8188.3	22.7482	11141.1	0.00204183	0.0450477	9.37651e-05	0.0459221	2.84438	2.78424	0.864878	1.43398	41.9057	3.13182	0.35157	2.78424	0.889016	5032.52	40.6475	1942.09	92.7048	3816.83	60.2917
204-01_Line1-4_60		bd	2098.04	1857.53	4728.35	9.13548	3921.44	0.00232962	0.0258428	3.76553e-05	0.0161637	1.70458	4.78748	0.888652	1.60446	71.8488	5.04919	0.586654	4.78748	0.948169	5070.92	45.4044	2975.84	224.274	4354.35	96.4048
204-01_Line1-4_61		bd	8645.88	7393.16	19093.9	92.974	52068.8	0.0017856	0.104553	0.000383227	0.214621	5.85869	5.78065	0.84805	0.799371	19.9493	5.83565	0.170687	5.78065	0.990574	5004.66	22.6864	1015.89	107.758	3088.9	107.009
204-01_Line1-4_62		421.736	7268.36	6202.99	16064	68.2017	23548.7	0.00289619	0.0878952	0.000281118	0.0970649	3.13797	1.73536	0.842575	0.956337	37.0055	1.98143	0.318678	1.73536	0.875813	4995.46	27.1521	1783.27	53.8439	3693.69	38.4425
204-01_Line1-4_63		bd	3011.86	2535.51	6582.81	29.1746	1363.32	0.0213997	0.0360986	0.000120254	0.00561942	0.437999	2.29819	0.840837	1.35292	264.572	2.66684	2.28311	2.29819	0.861763	4992.53	38.4166	7663.44	202.827	5667.75	52.5688
204-01_Host_Line1_01		455953	9032426	7614888	20175260	9240.78	154519	0.0598033	80.2014	0.030482	0.509703	0.0165713	4.10168	0.843971	0.521796	7019.02	4.13473	60.3453	4.10168	0.992005	4997.81	14.8132	26536.8	500.277	8992.76	80.6642
204-01_Host_Line1_03		107384	2020747	1740179	4481333	8122.9	91192.6	0.0890741	17.952	0.0267945	0.300811	0.0430863	1.69288	0.856551	0.436108	2739.81	1.74815	23.2092	1.69288	0.968383	5018.81	12.3692	20543	205.92	8037.78	34.8818
204-01_Host_Line1_04		606076	12097570	10313910	26427760	7409.91	164438	0.0450621	106.374	0.0244426	0.54242	0.0132259	3.25098	0.839405	0.540917	8746.86	3.29568	75.6092	3.25098	0.986439	4990.11	15.3612	27969.2	400.942	9216.19	64.807
204-01_Host_Line1_05		46925.7	864750	746326	1913990	5993.04	75927.4	0.0789311	7.67777	0.0197689	0.250457	0.0798277	2.18897	0.855393	0.423976	1476.79	2.22965	12.527	2.18897	0.981754	5016.89	12.0261	16790.9	256.198	7410.57	44.2692
204-01_Host_Line1_06		56015.4	1050329	900291	2314584	8514.55	77693	0.109592	9.28983	0.0280864	0.256281	0.0729566	1.53813	0.854674	0.437363	1614.51	1.5991	13.7068	1.53813	0.961871	5015.69	12.4065	17329.9	182.224	7501.05	31.9461
204-01_Host_Line1_07		254524	4996478	4079232	11500370	7846.69	110887	0.0707632	44.8157	0.0258834	0.365775	0.0219931	5.864	0.853496	0.442471	5348.37	5.88067	45.4689	5.864	0.997165	5013.74	12.5525	24746.4	700.311	8716.79	112.886
204-01_Host_Line1_08		562287	11376900	9680304	25033640	11555.2	162405	0.0711507	100.388	0.0381164	0.535714	0.0136913	3.08886	0.846927	0.588439	8525.23	3.14441	73.0389	3.08886	0.982334	5002.78	16.7014	27749.2	381.357	9190.13	61.9211
204-01_Host_Line1_09		363910	6997618	5914604	16025020	10474.8	153763	0.0681235	63.0267	0.0345527	0.507207	0.0192765	3.81363	0.85047	0.470396	6080.47	3.84253	51.8766	3.81363	0.992479	5008.7	13.3476	25579.1	465.19	8847.03	75.1678
204-01_Host_Line1_10		1441077	28686420	24705850	63120800	10454.6	283515	0.036875	253.771	0.034486	0.935214	0.00972529	2.33271	0.852436	0.459397	12080	2.37752	102.825	2.33271	0.981154	5011.98	13.0336	29928.8	291.18	9543.98	47.1653
204-01_Host_Line1_11		337947	6328126	5446047	14677520	6361.36	104396	0.0609352	57.6131	0.0209838	0.344363	0.01576	2.61163	0.851353	0.43925	7444.94	2.64831	63.452	2.61163	0.986149	5010.17	12.463	26855.2	323.247	9052.57	52.3982
204-01_Host_Line1_12		315081	5961708	5051102	14354590	5118.4	102317	0.050025	55.2515	0.0168837	0.337506	0.0154772	2.85751	0.854656	0.477404	7610.36	2.89711	64.6113	2.85751	0.986329	5015.66	13.5423	26970.2	352.957	9074.88	57.1849
204-01_Host_Line1_13		26155.3	478639	413412	1058012	2875.76	40289.3	0.0713777	4.24733	0.00948607	0.1329	0.0800716	1.19526	0.858198	0.471286	1477.12	1.28481	12.4888	1.19526	0.930295	5021.53	13.3654	16772.7	141.122	7410.8	25.7448
204-01_Host_Line1_14		68171.4	1267090	1092841	2806778	3809.82	48512	0.0785336	11.2533	0.0125672	0.160023	0.0370082	2.59534	0.856537	0.424918	3189.73	2.62989	27.0211	2.59534	0.986861	5018.78	12.0519	21485.6	314.855	8192.12	52.0339
204-01_Host_Line1_15		27120.8	503345	432135	1103893	2727.75	38106.3	0.0715827	4.44186	0.00899787	0.125699	0.0711769	1.28542	0.851802	0.487408	1649.32	1.37473	14.0495	1.28542	0.935038	5010.92	13.829	17478.4	152.888	7522.69	27.5242
204-01_Host_Line1_16		20265.4	372233	322406	820130	2529.68	33224	0.0761401	3.29924	0.0083445	0.109594	0.0842316	1.78633	0.858783	0.459427	1405.12	1.84446	11.872	1.78633	0.968482	5022.5	13.0285	16471	208.992	7360.1	36.7567
204-01_Host_Line1_17		13379.3	246334	211933	538169	1507.69	25244	0.0597246	2.17029	0.00497332	0.0832709	0.0977188	1.24596	0.851796	0.445389	1201.33	1.32317	10.2334	1.24596	0.941645	5010.91	12.6368	15593.2	144.703	7201.12	26.4993
204-01_Host_Line1_18		3935.36	73257.6	63297.4	161035	102.229	4129.25	0.0247574	0.648167	0.000337218	0.0136209	0.0532232	2.58674	0.8537	0.573852	2210.6	2.64962	18.7888	2.58674	0.976265	5014.08	16.2794	19243.3	309.119	7819.94	52.4073
204-01_Host_Line1_19		2122.28	38924.6	33489.8	85851.5	-1.86916	1102.46	-0.00169545	0.344711	-6.16568e-06	0.0036366	0.0254897	4.08435	0.85254	0.509241	4609.53	4.11597	39.2316	4.08435	0.992317	5012.15	14.4477	23817.3	494.072	8565.87	80.3065
204-01_Host_Line1_20		18643.4	345869	297273	757975	1550.59	25927	0.0598059	3.0517	0.00511483	0.0855238	0.071372	1.44323	0.85305	0.435971	1647.22	1.50764	14.0111	1.44323	0.957276	5013	12.3685	17462	171.379	7521.4	30.1461
204-01_Host_Line1_21		32947.2	611764	529059	1333616	2749.86	45090.3	0.0609857	5.38945	0.00907079	0.148736	0.0708788	3.9837	0.856422	0.421622	1665.24	4.00595	14.1086	3.9837	0.994446	5018.59	11.9585	17503.7	462.613	7532.44	78.2116
204-01_Host_Line1_22		32366.9	590164	510769	1303972	4362.35	51740.5	0.0843122	5.238	0.0143898	0.170673	0.0842882	5.2772	0.857842	0.420876	1402.64	5.29395	11.8641	5.2772	0.996835	5020.94	11.9361	16467	598.798	7358.3	102.119
204-01_Host_Line1_23		19085.9	371054	319746	815412	4468.11	53394.6	0.0836809	3.2806	0.0147387	0.176129	0.137815	3.6639	0.853903	0.437873	853.924	3.68997	7.25612	3.6639	0.992934	5014.41	12.4217	13608.1	402.343	6854.86	72.2169
204-01_Host_Line1_24		14444.6	264220	228934	580924	1858.02	31778.5	0.0584678	2.33939	0.00612893	0.104826	0.115007	1.5566	0.858162	0.463375	1028.38	1.62411	8.69516	1.5566	0.958435	5021.47	13.1411	14643.8	177.523	7043.42	32.4264
204-01_Host_Line1_25		39362.4	735348	634208	1598037	538.459	12425.2	0.0433361	6.46357	0.00177618	0.0409862	0.016732	4.25627	0.855519	0.43047	7046.75	4.27799	59.7658	4.25627	0.994924	5017.1	12.2102	26475.6	518.316	8996.76	83.3473
204-01_Host_Line1_26		134216	2503704	2153239	5569985	17517.6	159571	0.109779	22.2748	0.0577843	0.526367	0.0610263	1.61218	0.85279	0.422551	1925.89	1.66664	16.3864	1.61218	0.967326	5012.56	11.988	18408.9	192.983	7680.01	33.2766
204-01_Host_Line1_27		839542	16647490	14382880	36562400	18943.7	263844	0.0717989	147.22	0.0624884	0.870326	0.0150574	2.39414	0.856542	0.507363	7839.79	2.44731	66.4125	2.39414	0.978274	5018.79	14.3902	27144.8	297.14	9105.04	48.5152
204-01_Host_Line1_28		1154417	22933680	19918300	50254390	11691.5	281576	0.0415215	202.79	0.0385659	0.928819	0.0116801	1.55875	0.856514	0.471057	10106.4	1.62838	85.616	1.55875	0.957245	5018.74	13.3605	28760.6	195.648	9362.87	32.5383
204-01_Host_Line1_29		2989534	58617350	50692220	129834500	35118.2	631633	0.0555992	520.868	0.115842	2.08353	0.0104989	1.34817	0.856174	0.440356	11239	1.41826	95.2485	1.34817	0.950577	5018.18	12.49	29440.3	169.756	9470.71	28.3982
204-01_Host_Line1_30		50384.5	935177	809257	2060842	9108.4	94403.3	0.0964839	8.28808	0.0300453	0.311402	0.0976716	1.92034	0.858374	0.451587	1211.2	1.97272	10.2384	1.92034	0.973446	5021.82	12.8066	15596	221.699	7209.41	39.2595
204-01_Host_Line1_31		217337	4047674	3485785	9360662	13703.5	153343	0.0893653	36.7962	0.045203	0.505822	0.0355046	3.34455	0.854032	0.422357	3315.09	3.37111	28.1653	3.34455	0.992121	5014.63	11.9814	21743.6	403.524	8231.24	66.2309
204-01_Host_Line1_32		948597	18942500	16307370	41504560	12045.6	230120	0.0523446	167.175	0.0397339	0.759083	0.0117508	2.18372	0.853523	0.482519	10010.5	2.23639	85.1007	2.18372	0.976447	5013.78	13.6886	28722.1	272.434	9353.19	44.4251
204-01_Host_Line1_33		118185	2209611	1906128	4983687	2596.36	48981.3	0.0530071	19.819	0.00856444	0.161572	0.0220803	3.05456	0.855637	0.420838	5340.6	3.08342	45.2891	3.05456	0.990642	5017.29	11.9369	24721.4	374.236	8715.32	60.7511
204-01_Host_Line1_34		651131	12575350	10672460	27486900	7070.67	178202	0.0396779	110.503	0.0233236	0.587823	0.0136992	3.4346	0.837116	0.524102	8421.63	3.47436	72.9969	3.4346	0.988557	4986.23	14.8862	27745.5	422.668	9177.72	68.2048
204-01_Host_Line1_35		530071	10489450	8977660	23235510	7598.3	207034	0.0367008	93.0084	0.025064	0.682929	0.0187865	2.85025	0.849118	0.53983	6229.13	2.90092	53.2296	2.85025	0.982533	5006.44	15.3193	25742	350.972	8871.56	57.2564
204-01_Host_Line1_36		313896	5975603	5146487	13839860	10088.3	169071	0.059669	54.3684	0.0332776	0.557703	0.0262905	1.69432	0.856648	0.426023	4490.65	1.74706	38.0365	1.69432	0.969812	5018.97	12.0831	23622.9	209.411	8539.35	34.8652
204-01_Host_Line1_37		450306	8780813	7625464	20033270	7407.44	247275	0.0299562	79.3671	0.0244344	0.815671	0.0267774	1.79079	0.852147	0.441494	4385.84	1.84441	37.345	1.79079	0.970929	5011.49	12.526	23507.6	221.03	8515.37	36.7732
204-01_Host_Line1_38		136477	2590599	2232869	5778487	5473.85	112125	0.0488193	23.0916	0.0180562	0.369859	0.0414069	1.80484	0.854847	0.41439	2845.26	1.8518	24.1506	1.80484	0.97464	5015.98	11.7547	20788.9	219.658	8076.11	36.9134
204-01_Host_Line1_39		110413	2064550	1783618	4582100	5154	80437.2	0.0640748	18.3615	0.0170012	0.265333	0.0389908	1.77134	0.854427	0.416899	3020.08	1.81974	25.6471	1.77134	0.973403	5015.28	11.8262	21161.5	216.141	8136.64	36.2863
204-01_Host_Line1_40		204585	3857562	3332372	9138936	6210.19	94300.7	0.0658552	35.5651	0.0204852	0.311064	0.0232705	2.06314	0.857434	0.425899	5078.1	2.10664	42.9729	2.06314	0.97935	5020.27	12.0789	24390.5	254.843	8664.15	41.8961
204-01_Host_Line1_41		181885	3433661	2963086	7703006	4342.86	116020	0.037432	30.71	0.0143255	0.382708	0.0325033	1.37233	0.855608	0.419192	3627.88	1.43492	30.7661	1.37233	0.956377	5017.24	11.8902	22294.3	169.124	8322.77	28.7218
204-01_Host_Line1_42		77262.9	1450520	1251809	3211005	5454.14	80528.2	0.0677295	12.8795	0.0179912	0.265633	0.0531796	1.85065	0.855875	0.422277	2218.05	1.89822	18.8042	1.85065	0.974942	5017.69	11.9775	19248.3	222.663	7823.36	37.8179
204-01_Host_Line1_43		22666.5	426333	369152	932398	1721.13	34268.1	0.0502253	3.76342	0.00567737	0.113038	0.076085	1.87044	0.856175	0.467197	1550.85	1.92791	13.1432	1.87044	0.970193	5018.18	13.2513	17078.1	220.295	7460.22	38.391
204-01_Host_Line1_44		45445.3	851582	736684	1885091	2060.49	46099.2	0.0446969	7.56514	0.00679681	0.152064	0.0514517	1.71347	0.856056	0.427373	2293.02	1.76596	19.4357	1.71347	0.970275	5017.99	12.1219	19450.7	206.753	7857.1	35.2287
204-01_Host_Line1_45		13780.2	249692	217993	548885	277.039	8530.64	0.0324757	2.21414	0.00091385	0.0281395	0.0326277	1.77235	0.855839	0.46153	3615.03	1.83146	30.6488	1.77235	0.967727	5017.63	13.0909	22270.4	217.573	8319.17	36.5178
204-01_Host_Line1_46		10443.5	189429	163972	417334	1403.81	16694.5	0.084088	1.6787	0.00463065	0.0550691	0.0831516	2.12775	0.856755	0.436967	1420.01	2.17215	12.0262	2.12775	0.979557	5019.14	12.3934	16547.7	248.419	7370.79	43.1503
204-01_Host_Line1_47		15408.2	284680	246424	627829	2438.7	28509.4	0.0855401	2.52422	0.00804438	0.0940422	0.0954159	3.59126	0.857947	0.433747	1239.21	3.61736	10.4804	3.59126	0.992785	5021.11	12.301	15733.4	409.404	7232.61	70.8692
204-01_Host_Line1_48		9837.54	182868	157645	401254	1848.18	17752.6	0.104108	1.6156	0.00609649	0.0585594	0.093384	1.38447	0.854937	0.446362	1261.73	1.45465	10.7085	1.38447	0.951757	5016.13	12.6615	15860.2	161.219	7250.89	29.0962
204-01_Host_Line1_49		10072.1	194718	166197	434375	1168.79	13131	0.0890099	1.73218	0.00385541	0.0433144	0.063354	2.94257	0.854288	0.462988	1858.39	2.97877	15.7843	2.94257	0.987847	5015.05	13.1338	18181.8	347.254	7643.81	58.7278
204-01_Host_Line1_50		10325.9	189710	163939	418497	1369.35	14708.1	0.0931017	1.68177	0.00451697	0.0485165	0.0726347	1.63262	0.857369	0.478372	1626.78	1.70126	13.7675	1.63262	0.959653	5020.16	13.5672	17356.5	193.31	7508.73	33.9533
204-01_Host_Line1_51		95173.4	1783199	1538903	3972377	5483.84	49628.2	0.110498	15.8877	0.0180892	0.163705	0.0279778	6.11123	0.855949	0.413727	4216.38	6.12522	35.7426	6.11123	0.997716	5017.81	11.7349	23232.5	724.219	8475.37	117.314
208-01_Line1_01		11568.2	220845	188154	478373	11855.3	23920	0.495625	2.64076	0.0488662	0.0985951	0.103578	3.64641	0.845736	0.241203	1125.32	3.65438	9.65458	3.64641	0.997819	5000.78	6.84657	15252.2	412.516	7134.8	71.5638
208-01_Line1_02		2735.32	63708.3	53854.1	137912	4289.34	10906.6	0.393278	0.760274	0.0176801	0.0449557	0.169406	6.89512	0.83769	0.322246	681.492	6.90264	5.90298	6.89512	0.99891	4987.21	9.15246	12454.2	718.61	6626.14	131.128
208-01_Line1_03		1631.61	30053.5	25508.4	63657.7	1109.84	7386.79	0.150246	0.35479	0.00457461	0.0304474	0.241992	4.84968	0.840701	0.364309	478.792	4.86334	4.13237	4.84968	0.99719	4992.3	10.3448	10543.5	484.743	6268.32	94.0627
208-01_Line1_04		11415.4	218014	182655	465388	3487.61	104969	0.0332251	2.57733	0.0143755	0.432669	0.456541	4.60537	0.832491	0.213195	251.308	4.6103	2.19038	4.60537	0.99893	4978.37	6.05754	7478.75	395.282	5615.73	89.2166
208-01_Line1_05		2710.15	49527.4	42048.4	105523	4521.5	50113.4	0.0902254	0.586553	0.018637	0.206561	0.900616	2.99619	0.834429	0.226708	127.69	3.00475	1.11035	2.99619	0.99715	4981.67	6.44055	4814.53	200.108	4932.12	58.8089
208-01_Line1_06		4460.15	85802.3	72378.7	184953	7023.88	28891.7	0.243111	1.02115	0.0289515	0.119088	0.340724	2.20852	0.838875	0.228003	339.313	2.22026	2.93493	2.20852	0.994713	4989.22	6.47519	8830.9	208.955	5919.55	43.989
208-01_Line1_07		1573.98	33337.2	28058.3	73884.1	3725.79	13739.1	0.271182	0.402583	0.0153572	0.0566307	0.402402	6.41177	0.839243	0.361527	287.431	6.42195	2.48508	6.41177	0.998414	4989.84	10.2669	8048.29	564.047	5751.59	122.293
208-01_Line1_08		601.973	9048.67	7546.93	19388.3	2531.7	6048.93	0.418537	0.107086	0.0104353	0.0249329	0.655268	2.40067	0.824297	0.609457	173.369	2.47682	1.52609	2.40067	0.969254	4964.31	17.3274	5973.72	184.327	5240.57	48.8175
208-01_Line1_09		1797.18	32567.7	27578.6	70254.7	3130.22	14450.3	0.216619	0.388065	0.0129024	0.0595624	0.426778	3.65651	0.840358	0.339836	271.374	3.67227	2.34314	3.65651	0.995709	4991.72	9.65013	7780.24	322.225	5693.43	71.7086
208-01_Line1_10		1426.01	27686.5	23191	59070.1	4051.17	17802	0.227568	0.327197	0.0166984	0.0733774	0.641109	2.9111	0.831766	0.346727	178.803	2.93167	1.5598	2.9111	0.992982	4977.13	9.85215	6059.16	224.737	5271.73	57.5426
208-01_Line1_11		2517.44	47279.7	39761.1	101708	5063.44	21180.5	0.239061	0.561703	0.0208708	0.0873034	0.436088	5.39896	0.837687	0.294773	264.736	5.407	2.29312	5.39896	0.998513	4987.2	8.37216	7683.06	467.347	5668.38	103.89
208-01_Line1_12		2706.25	50988.6	43028.1	108366	5982.68	46680.5	0.128162	0.602278	0.0246598	0.192411	0.820317	5.50132	0.838547	0.293801	140.881	5.50916	1.21904	5.50132	0.998577	4988.66	8.34402	5138.28	378.322	5031.21	105.422
208-01_Line1_13		3366.67	63608.4	53742.2	136346	15858.1	26756.5	0.592681	0.754983	0.065365	0.110287	0.402765	3.33323	0.839858	0.297792	287.383	3.34651	2.48284	3.33323	0.996033	4990.88	8.45654	8044.14	299.301	5751.42	65.5613
208-01_Line1_14		5757.4	106781	92496.3	233555	7241.13	35897.9	0.201715	1.28808	0.029847	0.147966	0.334091	2.70375	0.841068	0.225297	346.954	2.71312	2.9932	2.70375	0.996546	4992.92	6.39728	8925.66	256.137	5942.09	53.504
208-01_Line1_15		2843.46	54632	45702.4	117821	8639.35	27043.1	0.319466	0.649216	0.0356103	0.111468	0.483241	2.26097	0.835836	0.28275	238.376	2.27858	2.06936	2.26097	0.992271	4984.06	8.03179	7229.46	193.595	5562.31	45.0644
208-01_Line1_16		9035.56	163535	140060	354902	16020.4	54801.9	0.292334	1.95964	0.0660342	0.225886	0.317633	5.1926	0.846077	0.32896	367.105	5.20301	3.14829	5.1926	0.997999	5001.35	9.33732	9171.28	489.059	5999.26	100.257
208-01_Line1_17		4544.6	81577.4	69260.8	176341	6805.4	21987.9	0.309507	0.973664	0.028051	0.0906312	0.258243	11.3048	0.840699	0.274813	448.66	11.3082	3.87232	11.3048	0.999705	4992.3	7.80351	10208.3	1065.29	6202.46	206.61
208-01_Line1_18		3811.67	72696.8	62021.9	158081	3341.56	7268.27	0.459746	0.871354	0.0137735	0.0299589	0.0937545	2.83782	0.848388	0.243805	1247.12	2.84828	10.6662	2.83782	0.99633	5005.22	6.9191	15836.9	326.124	7239.07	56.2105
208-01_Line1_19		876.56	16843.2	14972.2	38126.9	135.038	928.57	0.145426	0.208144	0.000556608	0.00382744	0.0510717	1.94219	0.856218	0.461268	2310.52	1.99621	19.5803	1.94219	0.972937	5018.25	13.0831	19496.1	233.94	7864.81	39.7333
208-01_Line1_20		503.073	8132.72	6849.77	17937.1	24.3107	528.883	0.0459661	0.0979665	0.000100206	0.00217999	0.0634559	2.99491	0.855507	0.669074	1858.05	3.06874	15.759	2.99491	0.975942	5017.08	18.9782	18172	353.232	7643.62	60.4498
208-01_Line1_21		bd	3837.18	3352.54	8729.86	11.8628	301.779	0.0393094	0.0473756	4.88967e-05	0.00124389	0.0706633	5.712	0.869607	1.1709	1696.03	5.83078	14.1516	5.712	0.97963	5040.25	33.1789	17522	653.556	7551.04	111.937
208-01_Line1_22		bd	3237.87	3118.38	7211.42	6.42415	287.005	0.0223834	0.0403765	2.64795e-05	0.001183	0.0723227	4.14305	0.863575	1.04138	1645.63	4.27193	13.8269	4.14305	0.969832	5030.38	29.5216	17382.4	479.822	7520.42	83.1967
208-01_Line1_23		bd	3988.17	3463.13	8480.96	12.4639	335.542	0.0371454	0.0474134	5.13744e-05	0.00138306	0.0738426	4.04762	0.857833	1.06847	1601.04	4.18627	13.5423	4.04762	0.96688	5020.93	30.3019	17257.5	468.522	7492.54	81.5924
208-01_Line1_24		315.167	5064.49	4369.4	11107.7	14.9229	334.818	0.0445701	0.0611303	6.15101e-05	0.00138008	0.0648173	4.29807	0.857779	1.01612	1823.86	4.41655	15.428	4.29807	0.973174	5020.84	28.8174	18043.4	500.471	7624.77	85.9022
208-01_Line1_25		bd	4375.13	4019.39	10321.7	32.6564	413.725	0.0789327	0.0556981	0.000134606	0.00170532	0.0820592	4.32013	0.855801	1.12987	1437.31	4.46544	12.1863	4.32013	0.96746	5017.56	32.0479	16626.5	495.229	7383.08	86.8014
208-01_Line1_26		324.1	5555.99	4726.26	11985.7	47.7358	535.002	0.0892255	0.0662679	0.000196761	0.00220521	0.0954189	3.98582	0.857611	0.87402	1238.69	4.08052	10.4801	3.98582	0.976791	5020.56	24.7877	15733.2	452.838	7232.18	79.5961
208-01_Line1_27		336.708	6657.64	5674.59	14400.1	51.7041	574.91	0.0899342	0.0795535	0.000213118	0.00236971	0.0922508	3.99206	0.846004	0.789699	1263.89	4.06942	10.84	3.99206	0.98099	5001.23	22.4152	15932.2	454.792	7252.62	79.3889
208-01_Line1_28		327.111	5292.01	4642.38	11749.9	121.546	846.087	0.143656	0.064531	0.000500995	0.00348746	0.13905	2.8939	0.84238	0.831819	834.916	3.01108	7.19165	2.8939	0.961085	4995.14	23.6171	13557.6	319.508	6832.03	59.3084
208-01_Line1_29		308.107	5684.55	4700.35	12240.3	103.292	1296.6	0.0796634	0.0673311	0.000425755	0.00534442	0.188275	6.06963	0.852611	0.869692	624.113	6.13162	5.31137	6.06963	0.98989	5012.27	24.6739	11876.6	627.047	6536.97	117.278
208-01_Line1_30		458.368	7602.73	6575.29	16827.9	259.3	1477.82	0.175461	0.0922714	0.0010688	0.00609137	0.184808	2.53336	0.864495	0.841088	644.684	2.66933	5.41101	2.53336	0.949061	5031.89	23.842	11977.5	269.943	6569.84	52.7308
208-01_Line1_31		750.264	15489.5	13278.9	33680.1	1000.97	6078.93	0.164662	0.185843	0.00412586	0.0250565	0.283576	4.90496	0.849665	0.465651	412.937	4.92701	3.52639	4.90496	0.995524	5007.36	13.2138	9733.6	474.757	6118.41	95.208
208-01_Line1_32		1296.29	24531.8	20812.1	53214.6	1146.24	6490.92	0.176592	0.293303	0.00472467	0.0267547	0.251673	2.05739	0.842128	0.401745	461.155	2.09625	3.97341	2.05739	0.981463	4994.71	11.4066	10340.7	208.512	6230.29	41.6133
208-01_Line1_33		487.088	10116.1	8735.23	22052	529.784	2909.48	0.182089	0.121726	0.0021837	0.0119925	0.273953	1.66039	0.859066	0.564749	432.172	1.75381	3.65026	1.66039	0.946735	5022.96	16.0149	9907.64	165.885	6164.53	34.9259
208-01_Line1_34		2097.51	39782.8	33791.4	85847.6	2361.69	10044	0.235134	0.474429	0.00973459	0.0414001	0.254506	2.8851	0.843007	0.388358	456.499	2.91112	3.92918	2.8851	0.991062	4996.19	11.0258	10283.1	289.891	6220.01	57.339
208-01_Line1_35		7287.43	139279	119107	305013	10532.2	13806.3	0.762854	1.67664	0.0434124	0.0569079	0.092833	3.18259	0.851654	0.254612	1264.35	3.19276	10.772	3.18259	0.996815	5010.67	7.22406	15895.1	364.942	7252.99	62.8033
208-02_Line1_01		8113.63	149450	126302	322736	3513.33	621649	0.00565164	2.02442	0.0157967	2.79507	3.50266	8.71229	0.835562	0.485588	32.8766	8.72582	0.285498	8.71229	0.99845	4983.59	13.7939	1618.99	244.76	3576.91	158.868
208-02_Line1_02		1091.66	25428.3	19217.4	47371.4	4340.1	349024	0.012435	0.311253	0.019514	1.56929	12.1644	5.5659	0.732126	0.967066	8.29472	5.64929	0.0822072	5.5659	0.985239	4795.1	27.7076	509.284	54.2817	2263.74	97.5421
208-02_Line1_03		bd	7099.71	1194.33	2438.21	2253.61	525206	0.00429091	0.0363024	0.0101327	2.36144	68.5678	1.38902	0.160995	4.32149	0.323593	4.53924	0.0145841	1.38902	0.306004	2466.14	145.981	93.3362	2.57373	284.662	22.2901
208-02_Line1_04		3130.42	55532.8	45873.8	116924	5328.18	1334791	0.00399177	0.738517	0.0239567	6.00151	23.4392	2.24616	0.818288	0.507174	4.81137	2.30271	0.0426636	2.24616	0.975443	4953.9	14.4261	269.322	11.8387	1786.89	37.996
208-02_Line1_05		bd	1951.71	505.439	1185.28	96.4997	106102	0.000909503	0.0123207	0.000433884	0.477056	45.5849	5.52326	0.330924	5.68038	1.00049	7.92295	0.0219371	5.52326	0.697122	3621.37	174.095	139.887	15.2681	704.059	77.4386
208-02_Line1_06		3314.38	72046.8	53763.2	134740	2213.3	932414	0.00237373	0.881323	0.00995148	4.19234	10.967	4.214	0.726208	0.738547	9.12599	4.27823	0.0911829	4.214	0.984987	4783.47	21.1719	562.529	45.2412	2350.72	75.4286
208-02_Line1_07		4295.12	83850.5	70638.6	180592	3334.4	171526	0.0194396	1.13343	0.0149922	0.771218	1.70736	3.22298	0.836365	0.485542	67.5112	3.25935	0.585699	3.22298	0.988842	4984.96	13.7918	2971.96	151.684	4292.02	63.2143
208-02_Line1_08		7288.16	152860	118259	306266	3327.6	880161	0.00378067	1.95304	0.0149616	3.9574	5.80092	3.71682	0.782274	0.58553	18.5852	3.76266	0.172386	3.71682	0.987818	4889.8	16.7029	1025.25	70.0793	3020.54	70.0374
208-02_Line1_09		4729.53	93132.5	75245.2	194172	3991.96	674276	0.00592036	1.22634	0.0179487	3.03169	5.00043	8.76301	0.805434	0.546101	22.1988	8.78001	0.199983	8.76301	0.998064	4931.38	15.5489	1175.23	185.589	3192.46	157.709
208-02_Line1_10		13149.3	251237	214037	548113	4592.23	364057	0.0126141	3.42784	0.0206477	1.63688	1.3427	3.10045	0.840486	0.439553	86.2694	3.13145	0.744767	3.10045	0.990099	4991.94	12.4816	3588.21	168.411	4537.75	60.9945
208-02_Line1_11		1433.53	27208.5	22962	59046.1	1479.35	309865	0.00477416	0.369431	0.00665147	1.39322	10.3943	3.91517	0.829848	0.686761	11.003	3.97495	0.0962067	3.91517	0.984962	4973.85	19.5169	592.14	44.1493	2523.38	71.4247
208-02_Line1_12		bd	1715.39	804.767	2045.74	216.813	60169.1	0.00360339	0.0154444	0.000974838	0.270533	31.3688	2.88261	0.461343	2.90493	2.0269	4.09244	0.0318789	2.88261	0.704374	4122.19	86.2282	202.297	11.4715	1124.58	54.1799
208-02_Line1_13		4072.88	79423.7	64557.4	168073	4545.26	395770	0.0114846	1.05554	0.0204365	1.77947	5.42809	4.93938	0.798362	0.621534	20.2702	4.97833	0.184227	4.93938	0.992176	4918.82	17.7067	1090.03	98.3158	3104.34	92.0444
208-02_Line1_14		2331.03	48005.6	37673.7	94669.1	1591.07	363475	0.00437739	0.610039	0.0071538	1.63426	6.35385	5.51896	0.77446	0.75314	16.7984	5.57011	0.157385	5.51896	0.990817	4875.48	21.4982	942.228	96.0399	2923.4	101.513
208-02_Line1_15		3425.94	60427.9	51242.7	125698	921.091	25636.6	0.0359288	0.802914	0.00414143	0.115268	0.247299	9.28567	0.842015	0.499692	469.248	9.2991	4.04368	9.28567	0.998555	4994.52	14.1877	10431.2	894.752	6247.92	172.856
208-02_Line1_16		2996	56270.3	47438.3	118917	687.589	61144	0.0112454	0.753043	0.00309155	0.274917	1.056	6.21724	0.838659	0.596134	109.452	6.24576	0.946966	6.21724	0.995435	4988.85	16.9302	4295.07	378.537	4776.96	118.497
208-02_Line1_17		422.726	6637.09	5413.23	13796.5	2931.28	830756	0.00352845	0.0874282	0.0131797	3.73526	111.401	19.7847	0.677981	3.64094	0.838754	20.117	0.00897659	19.7847	0.983485	4684.74	104.869	57.6086	22.654	618.458	171.092
208-02_Line1_18		bd	7138.78	2383.16	5495.19	2376.34	375811	0.00632322	0.0507963	0.0106845	1.68973	29.4248	13.8232	0.373121	6.47197	1.7476	15.2633	0.033985	13.8232	0.905651	3804.14	195.932	215.441	58.3128	1026.28	180.175
208-02_Line1_19		1488.32	27907.4	23700.7	61164.4	538.394	8036.3	0.0669952	0.381459	0.00242074	0.036133	0.257357	6.78661	0.839235	0.722378	449.422	6.82495	3.88566	6.78661	0.994383	4989.82	20.5147	10226	660.834	6204.18	129.65
208-02_Line2_01		567.433	8015.46	7594.13	19277	268.555	19595.5	0.0137049	0.118006	0.00120748	0.0881058	2.37616	4.61536	0.812727	1.65744	47.1384	4.90394	0.420847	4.61536	0.941153	4944.21	47.1644	2264.32	173.884	3933.67	93.1156
208-02_Line2_02		25787.1	484706	416719	1061564	12879.1	32937.9	0.391013	6.63992	0.0579074	0.148096	0.0665442	2.64262	0.849574	0.453207	1759.53	2.6812	15.0276	2.64262	0.985611	5007.2	12.8607	17884.4	311.788	7588.33	53.0098
208-02_Line2_03		11408.8	214523	183352	465568	2993.6	18203	0.164456	2.92065	0.0134599	0.0818449	0.0820797	5.29551	0.842501	0.603596	1414.62	5.3298	12.1833	5.29551	0.993567	4995.34	17.1372	16625	601.952	7366.93	102.778
208-02_Line2_04		1496.08	28164.1	23684.8	60311.9	452.681	17668	0.0256215	0.37939	0.00203535	0.0794393	0.590776	8.82823	0.84465	0.622719	197.042	8.85017	1.69269	8.82823	0.997521	4998.96	17.6774	6385.43	678.511	5369.83	164.707
208-02_Line2_05		3492.58	64064.3	55545.9	138710	794.948	8397.07	0.0946697	0.873784	0.00357426	0.0377551	0.098201	8.57937	0.848225	0.514126	1190.42	8.59476	10.1832	8.57937	0.998209	5004.95	14.5909	15564.3	935.87	7191.86	160.937
208-02_Line2_06		24531.2	460827	393518	1004643	998.86	16048.3	0.0622408	6.28813	0.00449109	0.0721567	0.031361	11.4473	0.85159	0.478126	3742.37	11.4573	31.8868	11.4473	0.999129	5010.57	13.5658	22517.8	1292.35	8354.31	209.442
208-02_Line2_07		22006.8	414648	353039	893303	8285.3	200334	0.0413573	5.61839	0.0372525	0.900748	0.435183	4.19336	0.844789	0.604061	267.536	4.23665	2.29788	4.19336	0.989783	4999.19	17.1475	7692.38	366.111	5679.02	82.2896
208-02_Line2_08		10375.2	195271	166971	415959	4548.39	486544	0.00934837	2.63231	0.0204506	2.18761	2.27593	4.92476	0.836049	0.553055	50.6266	4.95572	0.439381	4.92476	0.993753	4984.42	15.7098	2347.87	190.963	4004.71	94.1834
208-02_Line2_09		166814	3181538	2721592	7312309	20094.4	463096	0.0433914	44.702	0.0903488	2.08218	0.132293	1.83541	0.849185	0.43256	884.652	1.88569	7.55899	1.83541	0.973335	5006.56	12.2751	13840.3	205.672	6890.72	37.5479
208-02_Line2_10		2775.22	51656.9	43477.3	108531	2834.92	180627	0.0156949	0.688909	0.0127464	0.81214	3.07261	6.75617	0.82958	0.922285	37.2097	6.81883	0.325456	6.75617	0.990811	4973.39	26.2108	1816.32	210.411	3699.13	126.617
208-02_Line2_11		1175.8	21628	17415.5	44479.4	1723.13	139686	0.0123357	0.282521	0.00774759	0.62806	5.77365	3.74851	0.899479	3.83813	21.4707	5.36494	0.173201	3.74851	0.698705	5088.05	108.536	1029.72	70.9564	3160.09	99.1032
208-02_Line2_12		10806	206952	164969	445986	5812.54	320477	0.0181372	2.76662	0.0261345	1.44093	1.51569	5.51322	0.842632	0.772847	76.6183	5.56713	0.659764	5.51322	0.990317	4995.56	21.9424	3266.24	276.534	4418.75	105.881
208-02_Line2_13		12771.2	235580	199111	504692	1067.92	20895.9	0.0511069	3.17751	0.00480161	0.0939524	0.0876838	4.86698	0.849587	0.9175	1335.35	4.95271	11.4046	4.86698	0.982691	5007.23	26.036	16232.5	552.535	7308.42	95.8344
208-02_Line2_14		31086.8	527387	449812	1181821	6048.62	245179	0.0246703	7.30301	0.0271959	1.10238	0.415093	9.87592	0.84422	0.533271	280.296	9.8903	2.4091	9.87592	0.998545	4998.23	15.1386	7906.19	842.286	5726.16	182.672
208-02_Line2_15		120064	2262583	1934497	5026750	15388	438018	0.0351308	31.2001	0.0691876	1.96943	0.184915	4.09334	0.848333	0.503111	632.266	4.12414	5.40788	4.09334	0.992531	5005.13	14.2781	11974.4	430.676	6550.12	80.3544
208-02_Line2_16		29133	564746	470055	1208527	9011.82	378086	0.0238354	7.58818	0.0405191	1.69996	0.58636	9.09611	0.842085	0.633725	197.923	9.11816	1.70544	9.09611	0.997582	4994.64	17.9932	6415.88	699.864	5374.34	169.304
208-02_Line2_17		2086.28	42461	34260.6	86130.9	2073.13	549463	0.00377301	0.550858	0.00932125	2.47051	12.347	14.2997	0.772307	2.69123	8.62053	14.5507	0.0809913	14.2997	0.982747	4871.5	76.8346	502.037	136.672	2298.73	235.283
208-02_Line2_18		2658.91	56073.6	42743.3	106639	7097.37	591603	0.0119968	0.694967	0.0319113	2.65998	10.2551	10.7776	0.682923	1.96399	9.17779	10.9551	0.0975125	10.7776	0.983799	4695.2	56.5395	599.815	122.291	2355.9	183.071
208-02_Region1_01		bd	299.711	185.791	445.718	324.271	6623.48	0.0489578	0.0030555	0.00129729	0.0264981	18.2834	6.37784	0.615654	7.70416	4.64072	10.0015	0.0546943	6.37784	0.637685	4545.39	223.447	343.278	42.5016	1756.62	154.695
208-02_Region1_02		1374.75	50152.2	23026	55381.5	1728.44	2061196	0.000838564	0.421827	0.00691487	8.24608	36.796	2.26318	0.448684	1.94639	1.68053	2.98503	0.0271769	2.26318	0.758175	4080.85	57.9169	172.855	7.71544	1001.18	37.3105
208-02_Region1_03	outlier	bd	3741.73	2641.98	6734.98	1348.09	99141.2	0.0135976	0.0430447	0.00539319	0.396627	22.5619	4.90933	0.699166	1.73113	4.27081	5.2056	0.0443225	4.90933	0.943086	4729	49.7547	279.57	26.8075	1687.75	82.2354
208-02_Region1_04		bd	219.036	176.074	386.36	162.537	3586.7	0.0453165	0.00256414	0.00065025	0.0143491	13.9696	7.20095	0.798005	6.21474	7.8728	9.51192	0.0715842	7.20095	0.757045	4918.18	177.055	445.693	61.7232	2216.57	158.375
208-02_Region1_05	outlier	428.853	8843.84	7733.13	19507.7	879.838	106667	0.00824845	0.1184	0.00351991	0.426735	10.2117	8.2372	0.850962	1.37912	11.4846	8.35185	0.0979267	8.2372	0.986272	5009.52	39.1315	602.247	94.0338	2563.33	145.136
208-02_Region1_06		bd	16724.8	1197.81	1019.89	1006.98	1361778	0.000739462	0.0621538	0.00402857	5.44797	72.3861	1.32869	0.0712091	2.3969	0.135577	2.74054	0.0138148	1.32869	0.484827	963.423	97.901	88.4465	2.33388	129.097	6.62291
208-02_Region1_07		bd	392.063	253.824	495.392	468.946	11278.1	0.0415803	0.00374473	0.00187608	0.0451194	26.2745	4.99856	0.587992	5.41982	3.08421	7.37293	0.0380598	4.99856	0.677962	4478.6	157.736	240.795	23.5853	1428.77	107.203
208-02_Region1_08		1159.28	37616.2	22299.7	54945.1	9589.02	1099838	0.00871857	0.376879	0.0383621	4.40005	26.5136	2.24871	0.585122	1.03536	3.04148	2.47561	0.0377166	2.24871	0.908344	4471.48	30.1437	238.664	10.5288	1418.09	37.1465
208-02_Region1_09		bd	345.445	249.329	470.441	175.235	7059.7	0.0248219	0.00349516	0.00070105	0.0282433	19.3207	5.92316	0.676907	6.06	4.82849	8.47393	0.0517579	5.92316	0.698986	4682.46	174.564	325.305	37.4713	1789.87	133.401
208-02_Region1_10		3188.15	82359.7	51143.5	127074	2662.23	2083125	0.001278	0.855	0.0106506	8.33381	22.075	1.84594	0.615285	0.738552	3.84133	1.98821	0.0453001	1.84594	0.928446	4544.51	21.4215	285.602	10.3057	1601.45	31.541
208-02_Region1_11		6791.69	126020	105680	269724	2628.62	204596	0.0128479	1.64526	0.0105161	0.818511	1.45096	2.58344	0.832258	0.445672	79.0512	2.6216	0.689199	2.58344	0.985444	4977.97	12.6631	3379.56	134.484	4450.09	51.2576
208-02_Region1_12		bd	9668.62	2019.99	4375.66	499.829	631351	0.00079168	0.0527097	0.00199963	2.5258	59.0242	1.90733	0.193847	4.57042	0.452622	4.95244	0.0169422	1.90733	0.385129	2775.08	149.879	108.302	4.09552	379.114	30.8635
208-02_Region1_13		bd	6083.04	4806.91	11423.9	279.588	60947.7	0.00458734	0.0732156	0.00111853	0.243829	8.07165	7.14986	0.755859	3.58879	12.9058	7.99999	0.12389	7.14986	0.893733	4840.75	102.605	752.917	100.823	2672.8	140.581
208-02_Region1_14		bd	1629.72	625.449	1661	552.955	76194.5	0.00725714	0.0128497	0.00221217	0.304826	41.3112	3.57373	0.379746	4.027	1.26687	5.38407	0.0242065	3.57373	0.663759	3830.76	121.702	154.187	10.8805	830.989	59.3369
208-02_Region1_15		bd	230.978	153.998	444.131	169.123	2708.7	0.0624372	0.00272045	0.0006766	0.0108365	10.7024	6.37347	0.837719	10.9301	10.7876	12.6526	0.0934374	6.37347	0.503727	4987.26	310.438	575.834	69.8387	2505	211.506
208-02_Region1_16		7363.66	141508	114304	287874	3437.74	760782	0.0045187	1.78393	0.0137531	3.04361	4.9302	3.11151	0.800956	0.54604	22.3898	3.15906	0.202831	3.11151	0.984948	4923.44	15.5527	1190.51	67.2948	3200.79	59.625
208-02_Region1_17		2244.78	53291.7	35835.3	89441.6	2587.23	968945	0.00267015	0.585915	0.0103506	3.87639	15.7621	1.63935	0.667523	0.620143	5.83656	1.75273	0.0634431	1.63935	0.935315	4662.34	17.8814	396.531	12.597	1951.85	29.9416
208-02_Region1_18		bd	680.708	508.349	1202.78	234.111	10279.8	0.022774	0.00784802	0.000936593	0.0411255	14.968	4.84072	0.80221	6.60744	7.38634	8.1909	0.066809	4.84072	0.590987	4925.67	188.179	416.902	38.9667	2159.32	136.852
208-02_Region1_19		bd	136.441	104.062	220.588	109.825	1607.42	0.0683236	0.00151292	0.000439368	0.0064307	10.2615	6.78478	0.899715	9.83749	12.0837	11.9503	0.0974513	6.78478	0.56775	5088.42	278.183	599.455	77.2117	2610.92	202.524
208-02_Region1_20		847.935	14579.2	11876.3	31189.2	768.957	88796.6	0.00865976	0.189142	0.00307631	0.355242	5.10674	3.67867	0.838257	1.34445	22.6225	3.91666	0.19582	3.67867	0.939238	4988.17	38.1836	1152.82	77.2018	3210.84	73.4493
208-02_Region1_21		1525.88	43158.4	23891.5	57598.8	5399.19	1458126	0.00370283	0.408994	0.0216002	5.83342	28.9342	2.14656	0.553159	1.21145	2.63478	2.46482	0.0345612	2.14656	0.87088	4389.53	35.424	219.032	9.23876	1310.4	35.6505
208-02_Region2_01		bd	81.0574	70.9282	163.769	32.3643	212.539	0.152275	0.00103605	0.000129478	0.00085029	2.27862	8.58673	0.980712	10.8852	59.3164	13.8643	0.438861	8.58673	0.619339	5209.99	306.252	2345.54	329.118	4162.67	244.842
208-02_Region2_02	low Pb	bd	10.2808	7.81323	7.00583	59.5021	276.594	0.215125	8.23571e-05	0.000238046	0.00110655	25.5429	40.1606	0.268069	39.054	1.44638	56.0187	0.0391498	40.1606	0.716915	3294.77	1225.92	247.561	192.181	908.372	516.082
208-02_Region2_03	low Pb	bd	20.926	10.928	38.9732	11.9213	114.392	0.104215	0.000232396	4.76929e-05	0.00045764	4.30448	17.5017	0.954804	24.9564	30.5703	30.4816	0.232316	17.5017	0.574172	5172.3	703.228	1346.63	411.941	3505.32	471.073
208-02_Region2_04	low Pb	bd	18.3454	14.0766	29.1371	5.38012	35.307	0.152381	0.000201986	2.15239e-05	0.00014125	2.2341	44.8753	0.271228	50.8671	16.7316	67.8326	0.447608	44.8753	0.66156	3313.14	1594.48	2384.61	1578.83	2919.58	836.916
208-02_Region2_05	low Pb	bd	17.6896	3.6567	8.52623	-0.175439	19.307	-0.00908678	9.80171e-05	-7.01865e-07	7.72403e-05	0.973876	22.6944	0.0522471	161.011	7.39375	162.603	1.02682	22.6944	0.13957	296.24	7349.11	4554.2	1334.23	2160.21	1372.66
208-02_Region2_06	low Pb	bd	3.50662	5.35421	-2.01059	13.3839	95.5394	0.140088	2.24769e-05	5.3544e-05	0.000382218	25.3062	107.89	0.0745259	309.354	0.40587	327.628	0.0395161	107.89	0.329306	1055.74	12459.4	249.833	508.206	345.896	1078.18
208-02_Region2_08	low Pb	bd	60.9684	37.9417	121.904	15.0788	82.6996	0.182332	0.000724529	6.03247e-05	0.000330851	1.15701	10.201	0.926011	16.1853	110.303	19.1318	0.864298	10.201	0.533195	5129.12	456.898	4015.37	582.593	4784.74	326.448
208-02_Region2_09	low Pb	bd	13.8292	11.7212	24.219	-0.175439	31.7318	-0.0055288	0.000163302	-7.01865e-07	0.000126947	1.75973	34.5439	0.0869347	131.847	6.80853	136.297	0.56827	34.5439	0.253445	1359.05	5082.37	2900.71	1440.24	2086.83	1235.66
208-02_Region2_11	low Pb	bd	5.44211	4.87021	-0.398571	-0.175439	78.6801	-0.00222977	3.25288e-05	-7.01865e-07	0.00031477	10.6284	75.1964	-0.00907036	1046.82	-0.117615	1049.52	0.0940873	75.1964	0.0716484	#NUM!	#NUM!	579.665	784.054	-127.051	#VALUE!
208-02_Region2_12	low Pb	bd	10.6034	1.58371	-1.23191	8.55473	68.6673	0.124582	3.5946e-05	3.42243e-05	0.000274713	8.14692	59.4255	-1.11713	36.8609	-18.8981	69.9293	0.122746	59.4255	0.849794	#NUM!	#NUM!	746.348	787.498	#VALUE!	#VALUE!
208-02_Region2_13	low Pb	bd	6.012	8.27498	17.3972	7.76107	80.2674	0.0966902	0.000103961	3.10492e-05	0.00032112	6.41697	42.0693	-0.664654	44.9985	-14.2748	61.6011	0.155837	42.0693	0.682931	#NUM!	#NUM!	933.599	692.698	#VALUE!	#VALUE!
208-02_Region2_14	low Pb	bd	5.64692	2.85024	-4.28747	10.6579	84.064	0.126783	1.38127e-05	4.26383e-05	0.000336309	21.7033	87.8818	0.250608	205.65	1.59138	223.64	0.046076	87.8818	0.39296	3188.61	6509.5	290.385	480.69	966.839	1341.21
208-02_Region2_15	low Pb	bd	57.034	47.9772	117.935	11.0315	132.966	0.0829645	0.000731527	4.41328e-05	0.000531948	1.27345	13.6073	0.821567	10.6604	88.9132	17.2859	0.785267	13.6073	0.787191	4959.59	303.147	3736.13	728.874	4568.05	298.591
208-02_Region2_19	low Pb	bd	59.3455	40.9705	116.023	11.8935	830	0.0143296	0.000709846	4.75817e-05	0.00332052	9.01493	15.7439	0.632872	11.4575	9.67519	19.4717	0.110927	15.7439	0.808555	4585.34	331.635	678.13	199.56	2404.35	306.94
208-02_Region2_20	low Pb	bd	12.6787	5.43089	-3.64994	19.9859	811.902	0.0246161	4.74446e-05	7.99561e-05	0.00324812	33.9452	29.9556	-0.303705	199.144	-1.23305	201.384	0.0294593	29.9556	0.148748	#NUM!	#NUM!	187.163	109.583	#VALUE!	#VALUE!
208-02_Region2_21	low Pb	bd	17.3618	8.63291	16.3475	15.6141	1231.31	0.0126808	0.000138932	6.2466e-05	0.00492602	52.7613	31.2974	-1.7542	40.5836	-4.58215	51.2499	0.0189533	31.2974	0.610682	#NUM!	#NUM!	121.037	74.6226	#VALUE!	#VALUE!
208-02_Region2_07		bd	138.981	108.174	211.927	13.1579	143.307	0.0918159	0.00150633	5.26399e-05	0.00057332	1.24822	18.3105	0.479738	16.4328	52.9685	24.6031	0.801138	18.3105	0.744235	4180.13	486.141	3793.19	972.808	4049.75	400.09
208-02_Region2_10		bd	125.12	107.609	237.103	252.246	979.18	0.257609	0.0015416	0.00100914	0.00391734	2.13781	17.3472	0.918421	7.07191	59.2079	18.7333	0.467769	17.3472	0.926008	5117.5	199.732	2473.77	676.052	4160.84	318.5
208-02_Region2_16		bd	773.195	572.211	1407.86	9650.53	80086.8	0.120501	0.00903396	0.0386082	0.320398	83.5783	5.13759	0.741877	2.53133	1.22333	5.72735	0.0119648	5.13759	0.897028	4814.04	72.4616	76.6724	7.82681	811.298	62.0603
208-02_Region2_17		bd	1264.73	434.702	1027.1	5377.5	755967	0.00711341	0.00894621	0.0215134	3.02434	413.131	6.81158	0.376077	3.65439	0.125457	7.72996	0.00242054	6.81158	0.881193	3816.08	110.547	15.5849	2.12025	120.007	17.3495
208-02_Region2_18		bd	73.0996	61.7478	163.769	11.1149	1470.03	0.00756102	0.000979813	4.44666e-05	0.00588103	14.1081	13.339	1.04554	17.8046	10.2136	22.2471	0.0708811	13.339	0.599586	5299.88	499.111	441.462	112.838	2454.31	345.458
208-02_Region2_22		bd	665.02	574.146	1358.8	72.481	12850.4	0.00564035	0.00852439	0.00028997	0.0514099	16.7911	3.02706	0.826632	2.60642	6.78484	3.99456	0.0595555	3.02706	0.757795	4968.33	74.0895	372.922	21.8993	2083.75	68.3472
210-01_Line1_01		851.193	14697.5	12372.4	31782.5	1316.06	12524.5	0.105079	0.199072	0.0059173	0.0563127	0.662185	4.87211	0.826698	0.703817	172.057	4.92268	1.51015	4.87211	0.989726	4968.44	20.0064	5932.91	367.245	5232.9	94.8219
210-01_Line1_02		508.786	9568.44	6731.04	16854.2	3897.52	156519	0.0249013	0.112144	0.0175241	0.703744	15.0964	4.62483	0.668619	1.58596	6.10396	4.8892	0.066241	4.62483	0.945927	4664.71	45.7248	413.469	36.9378	1990.81	81.9168
210-01_Line1_03		bd	3574.62	2933.37	7723.12	611.914	3595.66	0.170181	0.0481376	0.0027513	0.0161669	0.943557	2.45444	0.839308	1.10869	122.591	2.69323	1.05982	2.45444	0.911338	4989.95	31.4853	4658.3	160.796	4891.08	52.8511
210-01_Line1_04		bd	2485.13	2163.5	5518.95	539.196	5281.56	0.10209	0.0343924	0.00242434	0.023747	1.87899	5.38777	0.853887	1.17696	62.6298	5.51482	0.532199	5.38777	0.976961	5014.39	33.3882	2750.71	236.872	4216.97	104.65
210-01_Line1_05		bd	2239.19	2052.5	4959.72	790.815	1886.12	0.419282	0.0312934	0.00355568	0.0084804	0.805338	3.83483	0.891578	1.22957	152.576	4.02713	1.24172	3.83483	0.952249	5075.57	34.7887	5203.81	268.207	5111.64	78.162
210-01_Line1_06		bd	3365.85	2847.87	7112.44	446.527	7558.05	0.0590796	0.0450765	0.00200768	0.0339827	2.17861	2.53661	0.845775	1.24734	53.5032	2.8267	0.459007	2.53661	0.897375	5000.84	35.4057	2435.17	102.075	4059.77	54.8423
210-01_Line1_07		3845.34	68923.9	59925.4	152287	2482.91	9511.78	0.261035	0.95096	0.0111637	0.0427671	0.127897	2.78921	0.853217	0.560493	919.403	2.84496	7.8188	2.78921	0.980401	5013.27	15.901	14033.1	311.196	6929.8	56.1313
210-01_Line1_08		913.68	18567.8	15856.7	40997.6	524.629	3599.99	0.145731	0.25512	0.00235885	0.0161864	0.181738	2.41213	0.853743	0.617785	647.421	2.48999	5.50242	2.41213	0.968732	5014.15	17.5256	12068.8	257.935	6574.14	49.2728
210-01_Line1_09		463.849	8260.56	6833.06	17100.2	4993.77	7067.28	0.706604	0.108897	0.0224531	0.031776	0.82097	3.08326	0.839154	0.812317	140.871	3.18847	1.21807	3.08326	0.967003	4989.69	23.0689	5135.46	214.686	5031.14	62.3405
210-01_Line1_10		1349.05	25893.7	22183.9	56505.7	4577.31	11747.2	0.389651	0.353759	0.0205806	0.052818	0.426642	1.88123	0.847182	0.580295	273.665	1.9687	2.34388	1.88123	0.955571	5003.2	16.47	7781.68	167.807	5701.94	39.0726
210-01_Line1_11		1427.28	24768.4	22662.8	53260	5274.7	12577.2	0.419386	0.340594	0.0237162	0.0565498	0.411705	4.04851	0.85892	0.780147	287.523	4.12299	2.42892	4.04851	0.981935	5022.72	22.1233	7943.57	359.528	5751.92	80.1869
210-01_Line1_12		1534.51	29595.2	23451	62635.4	17548.9	167106	0.105016	0.391299	0.0789035	0.751345	4.91216	3.26329	0.789964	0.668492	22.1637	3.33106	0.203577	3.26329	0.979656	4903.75	19.0574	1194.51	70.7738	3190.93	62.7464
210-01_Line1_13		9215.96	175407	139843	381295	9981.22	20978.9	0.475775	2.3561	0.0448778	0.0943256	0.11318	6.83329	0.845612	0.476646	1029.69	6.84989	8.83547	6.83329	0.997576	5000.57	13.5298	14736.5	746.49	7044.71	130.248
210-01_Line1_14		5124.04	100448	85001.2	213159	4137.77	35836.1	0.115464	1.34831	0.0186043	0.161127	0.351126	5.09684	0.840726	0.452784	329.987	5.11691	2.84798	5.09684	0.996077	4992.34	12.8571	8686.86	468.882	5891.33	98.6476
210-01_Line1_15		13859.1	260576	222269	567789	29561.1	110285	0.268043	3.55383	0.132913	0.495865	0.387515	4.76527	0.846583	0.424762	301.083	4.78416	2.58054	4.76527	0.996051	5002.2	12.0562	8222.5	428.245	5798.55	92.4902
210-01_Line1_16		8046.07	153445	130115	333557	8743.08	92685.2	0.0943308	2.08743	0.0393108	0.416733	0.539107	4.01102	0.842606	0.459189	215.405	4.03722	1.85492	4.01102	0.993511	4995.52	13.0371	6762.57	327.533	5459.87	78.4939
210-01_Line1_17		bd	536.495	451.991	1163.24	253.448	855.912	0.296114	0.00727832	0.00113956	0.00384837	1.43583	6.83377	0.801279	5.42245	76.9105	8.72372	0.69646	6.83377	0.783355	4924.01	154.442	3407.21	351.927	4422.56	161.357
210-01_Line1_18		1216.48	22203.3	18573.1	48016.5	529.128	20087.2	0.0263415	0.300347	0.00237908	0.0903165	0.851243	3.6808	0.838793	0.601592	135.802	3.72964	1.17475	3.6808	0.986905	4989.08	17.085	5008.32	251.381	4994.2	72.5331
210-01_Line1_19		5218.38	89631.8	76007.2	191482	1481.94	17475	0.0848037	1.20798	0.00666315	0.0785714	0.176588	3.83901	0.845486	0.603776	659.858	3.8862	5.66288	3.83901	0.987857	5000.36	17.1386	12226	407.514	6593.43	75.8919
210-01_Line1_20		14804.1	284573	239286	611163	6235.43	15432.8	0.404037	3.83928	0.0280358	0.0693892	0.0511542	3.89063	0.847294	0.43001	2282.75	3.91432	19.5487	3.89063	0.993948	5003.39	12.2045	19486.2	460.365	7852.54	76.5004
210-01_Line1_21		1326.01	26017.3	22493.7	56754.7	2800.54	19037.5	0.147106	0.356067	0.0125918	0.085597	0.815909	5.20059	0.863328	0.878014	145.828	5.27418	1.22563	5.20059	0.986046	5029.98	24.8908	5157.38	359.051	5066.01	101.166
210-01_Line1_22		2088.75	36973.2	31608.6	82456.9	3564.64	15082.5	0.236342	0.510897	0.0160274	0.0678145	0.389987	2.36663	0.840553	0.534537	297.044	2.42625	2.56419	2.36663	0.975429	4992.05	15.1787	8192.99	215.862	5784.88	47.9556
210-01_Line1_23		1068.81	20719.4	17755.5	44142.7	4503.81	19138.3	0.235329	0.279459	0.0202501	0.0860501	0.771199	3.27075	0.842716	0.64761	150.599	3.33425	1.29668	3.27075	0.980956	4995.7	18.3866	5359.97	233.792	5098.48	65.1299
210-01_Line1_24		746.217	13235.3	11019.3	29895.9	3953.14	39000.7	0.101361	0.183167	0.0177742	0.175356	3.11127	5.51796	0.809842	0.849581	35.8731	5.58298	0.321412	5.51796	0.988354	4939.14	24.1814	1796.62	170.76	3662.98	104.713
210-01_Line1_25		bd	2913.27	2439.28	6274.32	164.729	1642.54	0.100289	0.0393285	0.000740659	0.00738522	0.531694	2.90989	0.838418	1.36772	217.323	3.2153	1.88078	2.90989	0.905015	4988.44	38.844	6820.7	240.398	5468.83	63.0006
210-01_Line1_26		706.091	13613.5	11688	29592.4	1491.17	13540.1	0.110131	0.185682	0.00670465	0.0608791	0.929974	1.58368	0.842471	0.840588	124.85	1.79294	1.0753	1.58368	0.883287	4995.29	23.866	4706.56	104.936	4909.47	35.4935
210-01_Line1_27		627.49	9555.24	8380.43	20733.1	2668.52	10641	0.250777	0.130799	0.0119983	0.0478443	0.976384	1.93383	0.855916	0.802284	120.814	2.09365	1.02419	1.93383	0.923666	5017.75	22.756	4545.81	124.934	4876.37	41.316
210-01_Line1_28		17881.9	337717	289420	741218	15537.7	56048.4	0.27722	4.62854	0.0698611	0.252006	0.158814	2.80204	0.844946	0.438971	733.238	2.83621	6.29666	2.80204	0.98795	4999.45	12.461	12811.7	304.448	6700.34	55.9483
210-01_Line2_09	low U	bd	160.357	145.084	292.894	-1.93799	25.512	-0.0759636	0.0020239	-8.71361e-06	0.000114708	0.147396	10.8006	1.14638	8.98874	1071.88	14.0517	6.78444	10.8006	0.768632	5428.6	250.72	13228.9	1111.95	7085.45	251.269
210-01_Line2_10	low U	bd	141.607	142.087	295.238	8.50978	26.7188	0.318495	0.00195827	3.82619e-05	0.000120133	0.132313	11.2805	0.988485	8.51474	1029.61	14.1333	7.55782	11.2805	0.79815	5221.09	239.45	13839.5	1171.28	7044.63	252.554
210-01_Line2_01		bd	419.423	361.18	909.699	140.92	1166.92	0.120762	0.00571754	0.000633605	0.00524672	2.66879	5.35366	0.909811	4.43073	46.9832	6.94932	0.374702	5.35366	0.770387	5104.19	125.207	2051.49	185.445	3930.4	129.555
210-01_Line2_02		1911.13	33970.8	28855.5	73484	733.227	8768.02	0.0836251	0.461077	0.00329675	0.0394229	0.23671	2.69817	0.846629	0.614758	492.927	2.76731	4.22458	2.69817	0.975013	5002.28	17.4488	10658.3	275.322	6297.8	54.5898
210-01_Line2_03		797.256	16206.1	13697.4	35372.7	390.373	3093.36	0.126197	0.2208	0.0017552	0.0139084	0.171938	2.26457	0.84237	0.652853	675.207	2.35679	5.81606	2.26457	0.960867	4995.12	18.5359	12372.5	244.438	6616.74	46.6996
210-01_Line2_04		bd	3228.56	2765.28	6686.59	181.396	711.622	0.254905	0.0428923	0.000815596	0.00319961	0.204142	2.02361	0.863722	1.32863	583.106	2.4208	4.89855	2.02361	0.835927	5030.63	37.6642	11440.5	213.108	6468.07	47.9274
210-01_Line2_05		bd	4679	4005.99	10123.3	66.5237	591.98	0.112375	0.0636201	0.000299105	0.00266167	0.120239	2.71619	0.835715	1.16522	957.901	2.95558	8.3168	2.71619	0.919006	4983.86	33.0994	14387.2	305.264	6971.4	58.2547
210-01_Line2_06		336.889	4088.66	3500.95	8907.62	120.096	756.01	0.158855	0.0558028	0.000539979	0.00339919	0.183481	2.61729	0.861683	1.11735	647.234	2.84582	5.45015	2.61729	0.919697	5027.27	31.6794	12016.8	279.002	6573.85	56.1228
210-01_Line2_07		966.664	15565.6	13130.6	33628.9	158.669	1992.89	0.0796174	0.210818	0.000713409	0.00896047	0.118271	2.02051	0.833432	0.664577	971.175	2.127	8.45515	2.02051	0.949935	4979.97	18.8814	14482.3	228.84	6985.36	42.2583
210-01_Line2_08		803.162	16320.8	13749.8	35390.1	186.524	1152.55	0.161837	0.221425	0.000838654	0.0051821	0.0640794	2.42971	0.842529	0.807365	1812.06	2.56034	15.6056	2.42971	0.94898	4995.39	22.9226	18112.8	287.869	7618.19	50.6797
210-01_Line2_11		2498.33	44975.1	38150.3	97632.6	432.681	20237.9	0.0213798	0.611424	0.00194543	0.0909939	0.353549	6.47334	0.836565	0.537571	326.104	6.49563	2.82846	6.47334	0.99657	4985.3	15.2694	8654.08	588.865	5879.35	123.662
210-01_Line2_12		bd	239.769	218.789	536.648	26.187	143.364	0.182662	0.00336634	0.000117743	0.000644594	0.434676	10.3335	1.01478	8.27723	321.745	13.2399	2.30056	10.3335	0.780485	5257.98	232.423	7697.62	867.545	5865.73	237.867
210-01_Line2_13		bd	293.671	236.647	543.828	379.125	1734.69	0.218555	0.00363336	0.00170463	0.00779956	5.34381	5.91046	0.91309	5.97738	23.5488	8.40611	0.187132	5.91046	0.703115	5109.28	168.878	1105.82	119.016	3249.9	151.817
210-01_Line2_14		bd	3629.22	3218.94	8073.9	1479.56	2604.8	0.568012	0.0504747	0.00665243	0.0117118	0.578182	3.93589	0.858737	1.13717	204.692	4.09687	1.72956	3.93589	0.960706	5022.42	32.2481	6473.1	313.777	5408.32	79.591
210-01_Line2_15		14845.3	285502	241634	617544	45381.2	48444.7	0.936764	3.87194	0.204044	0.217818	0.149508	6.32996	0.837836	0.43463	772.325	6.34486	6.6886	6.32996	0.997651	4987.46	12.3443	13149	673.522	6753.01	121.158
210-01_Line2_16		22273.4	426558	361402	912783	31566.1	49533.1	0.637272	5.75286	0.141928	0.222712	0.10167	2.97819	0.839683	0.422274	1138.22	3.00797	9.83571	2.97819	0.990097	4990.58	11.9917	15360.8	339.441	7146.37	59.2675
210-01_Line2_17		37280.3	714300	604887	1576115	21329.9	59328.2	0.359524	9.79352	0.095904	0.266753	0.08176	3.2891	0.841792	0.421508	1418.96	3.316	12.2309	3.2891	0.991888	4994.14	11.968	16648.2	380.55	7370.04	65.1567
210-01_Line2_18		25676.6	485408	413003	1053258	33626.1	77820.4	0.432099	6.60163	0.151191	0.349898	0.178547	3.53211	0.840897	0.430645	649.078	3.55827	5.60078	3.53211	0.992649	4992.63	12.2283	12165.6	375.262	6576.73	69.701
210-01_Line2_19		85308.7	1626087	1385157	3604107	24847	85665.7	0.290046	22.3768	0.111718	0.385172	0.0393384	5.90907	0.844072	0.418368	2957.12	5.92386	25.4205	5.90907	0.997503	4997.98	11.8769	21106.5	694.248	8115.26	113.654
210-01_Line2_20		4101.17	80189.3	67297	171137	3603.5	20364	0.176955	1.07776	0.0162021	0.091561	0.219614	4.2934	0.841837	0.542909	528.293	4.32759	4.55345	4.2934	0.9921	4994.22	15.415	11051.9	438.601	6368.02	84.1334
210-01_Line2_21		24816.5	476225	404466	1034899	1211.8	23065.8	0.0525366	6.47959	0.00544852	0.103709	0.0554743	7.81225	0.843962	0.45638	2096.7	7.82557	18.0264	7.81225	0.998298	4997.8	12.9561	18990	889.928	7766.26	147.579
210-01_Line2_22		2894.98	53304.5	45507.5	113911	2001.25	12237.5	0.163534	0.719547	0.00899806	0.0550226	0.2218	3.02186	0.846648	0.645045	526.075	3.08994	4.50857	3.02186	0.977968	5002.31	18.3085	10999.6	311.241	6363.75	60.7748
210-01_Line2_23		bd	5657.57	4753.52	11792.7	259.174	2172.48	0.119299	0.0751055	0.0011653	0.00976796	0.364596	2.7007	0.838648	2.09826	317.011	3.42002	2.74276	2.7007	0.789676	4988.83	59.5907	8508.13	250.244	5850.72	66.9758
210-01_Line2_24		bd	4429.06	3855.01	9057.5	146.5	1377.69	0.106337	0.0586588	0.000658696	0.00619442	0.296651	2.6635	0.877478	2.30794	407.659	3.52432	3.37097	2.6635	0.755749	5053.01	65.3626	9508.36	259.541	6105.38	68.9972
210-01_Line2_25		368.997	6535.47	5542.4	13786.6	244.217	2477.45	0.098576	0.0874882	0.00109805	0.0111391	0.397584	4.84566	0.840697	1.90456	291.418	5.20651	2.51519	4.84566	0.930692	4992.3	54.0812	8103.74	432.198	5765.53	100.254
210-01_Line2_26		3649.66	69573.6	58173.9	146502	1266.84	19789.6	0.0640154	0.927663	0.00569599	0.0889784	0.284007	3.01481	0.842205	0.485361	408.691	3.05363	3.52105	3.01481	0.987287	4994.84	13.7806	9725.98	295.827	6107.94	60.0495
210-01_Line2_27		3931.72	74348.5	62783.5	160220	980.168	16016.3	0.0611982	1.00581	0.00440705	0.0720127	0.205138	1.88911	0.839481	0.499863	563.988	1.95413	4.87476	1.88911	0.96673	4990.24	14.1952	11414.4	198.998	6434.28	38.8603
210-01_Line2_28		3170.72	56440.8	47566.6	122398	684.223	12482.5	0.0548144	0.765829	0.00307642	0.0561242	0.204336	1.45214	0.84248	0.512875	568.227	1.54005	4.89391	1.45214	0.942918	4995.3	14.5615	11435.4	153.612	6441.87	30.7496
210-01_Line2_29		5535.6	101516	86138.4	218393	1111.79	19070.7	0.0582985	1.37348	0.00499886	0.0857459	0.176637	2.05732	0.842224	0.471307	657.13	2.11062	5.66133	2.05732	0.974749	4994.87	13.3816	12224.5	221.576	6589.23	41.9192
210-01_Line2_30		387.923	6007.53	5183.21	12874.3	256	6188.81	0.0413649	0.0814012	0.00115103	0.0278263	0.824249	4.15468	0.841745	1.28492	140.743	4.34884	1.21323	4.15468	0.955354	4994.06	36.4833	5121.36	287.14	5030.23	84.1098
210-01_Line2_31		1351.01	24608.7	20695.7	53181.2	1146.52	10664.3	0.10751	0.333133	0.00515502	0.0479491	0.379726	3.93151	0.837848	0.64324	304.089	3.98379	2.63348	3.93151	0.986879	4987.48	18.2691	8317.1	357.293	5808.6	77.5944
210-01_Line2_32		1264.95	25908.6	21872	54357.6	1808.63	6792.67	0.266263	0.345488	0.00813202	0.0305413	0.217315	3.15615	0.854561	0.733465	541.95	3.24025	4.60161	3.15615	0.974044	5015.51	20.8061	11107.5	325.896	6393.88	63.6439
210-01_Line2_33		1480.74	27496.3	23070.1	58864.1	734.957	7419.55	0.0990569	0.370155	0.00330453	0.0333599	0.236097	2.14415	0.830555	0.538701	484.824	2.21079	4.23555	2.14415	0.969859	4975.06	15.3084	10671.9	219.849	6281	43.8432
210-01_Line2_34		695.41	12009.4	10113	25774.4	526.639	7836.11	0.0672066	0.162014	0.00236788	0.0352329	0.620495	2.09463	0.827674	0.747475	183.834	2.224	1.61162	2.09463	0.941828	4970.12	21.2459	6188.36	164.533	5299.75	43.9547
210-01_Line2_35		3969.3	78045.9	66150.4	170401	3539.02	52821.6	0.0669996	1.06414	0.0159122	0.237497	0.594345	3.87026	0.840616	0.478469	194.924	3.89973	1.68252	3.87026	0.992445	4992.16	13.5865	6361.05	305.613	5358.91	75.8827
210-01_Line2_36		bd	411.211	256.087	647.383	545.794	8773.19	0.0622116	0.00444698	0.00245401	0.0394462	19.6941	3.74313	0.637566	3.99749	4.46164	5.4764	0.0507766	3.74313	0.683502	4596.03	115.645	319.288	23.2784	1723.87	87.0133
210-01_Region1_08	low Pb	bd	41.6788	32.775	61.7523	357.085	577.543	0.618282	0.000446916	0.00142856	0.00231054	13.4655	13.1472	0.686799	20.2844	7.02933	24.1724	0.074264	13.1472	0.543895	4703.34	583.718	461.794	116.127	2115.14	358.364
210-01_Region1_16	low Pb	bd	29.8208	20.4258	44.7109	63.3167	253.668	0.249604	0.000311572	0.000253307	0.00101483	7.61544	16.0865	0.219493	63.0641	3.97221	65.0835	0.131312	16.0865	0.247167	2976.98	2031.47	795.346	236.345	1628.54	723.858
210-01_Region1_17	low Pb	bd	46.005	25.8861	62.632	22.165	307.986	0.0719676	0.000441394	8.8674e-05	0.00123214	6.0693	13.181	0.542844	17.0208	12.3266	21.5278	0.164764	13.181	0.612276	4361.99	498.446	983.195	236.018	2629.6	340.377
210-01_Region1_19	low Pb	bd	56.2026	43.7751	71.9581	8.75314	107.807	0.0811925	0.000564151	3.50181e-05	0.000431297	1.94515	23.756	0.53913	25.579	38.1986	34.9089	0.5141	23.756	0.680514	4351.93	749.475	2674.11	964.125	3725.07	526.996
210-01_Region1_01		329.61	5854.63	5012.64	12456.3	486.925	2680.24	0.181672	0.0765286	0.00194801	0.0107226	0.406714	2.557	0.859717	0.999733	291.321	2.74549	2.45873	2.557	0.931346	5024.04	28.3487	7999.37	230.195	5765.2	54.0968
210-01_Region1_02		bd	616.354	561.406	1368.25	182.029	2040.89	0.089191	0.0083539	0.00072823	0.00816483	2.53527	4.76395	0.891085	3.31367	48.4396	5.80307	0.394435	4.76395	0.820936	5074.79	93.7579	2143.36	171.437	3960.76	109.357
210-01_Region1_03		bd	3640.53	1915.18	4595.27	16971	138740	0.122322	0.0333072	0.0678946	0.555049	31.7607	5.69688	0.526872	3.1762	2.28623	6.52248	0.0314854	5.69688	0.873423	4318.21	93.2357	199.838	22.3809	1208.04	88.2053
210-01_Region1_04		bd	628.898	496.224	1226.75	905.498	4894.93	0.184987	0.0077169	0.00362256	0.0195828	7.06688	3.39957	0.791852	3.10615	15.4427	4.60492	0.141505	3.39957	0.738248	4907.15	88.5368	853.168	54.1057	2842.95	84.2351
210-01_Region1_05		bd	972.965	758.971	2037.06	295.858	1735	0.170523	0.0123667	0.00118362	0.00694111	1.65313	2.83023	0.811549	2.6983	67.6573	3.91038	0.604914	2.83023	0.723775	4942.14	76.7908	3049.61	136.088	4294.18	75.3851
210-01_Region1_06		bd	68.3456	59.9418	130.777	93.2674	223.443	0.41741	0.000850036	0.000373128	0.000893912	3.13274	10.9546	0.885496	13.9902	38.9554	17.7688	0.319209	10.9546	0.61651	5065.89	395.994	1785.87	332.999	3744.49	302.071
210-01_Region1_07		bd	69.8209	63.3871	154.495	135.309	363.41	0.372331	0.000944004	0.00054132	0.00145387	4.61779	7.68793	0.888762	7.35517	26.5251	10.6397	0.216554	7.68793	0.722572	5071.1	208.142	1263.64	174.067	3366.09	189.401
210-01_Region1_09		bd	116.733	69.4305	185.141	28.396	1858.19	0.0152815	0.00121831	0.000113602	0.00743395	13.6964	7.50393	0.694463	12.0817	6.98793	14.2224	0.0730119	7.50393	0.527614	4719.31	347.405	454.276	65.4965	2109.9	225.632
210-01_Region1_10		bd	177.346	135.519	341.435	119.986	1214.92	0.0987603	0.00214687	0.00048002	0.00486046	5.52437	7.00672	0.784745	6.18974	19.5772	9.34917	0.181016	7.00672	0.749448	4894.3	176.533	1072.52	136.994	3070.71	166.249
210-01_Region1_11		bd	2870.69	2301.93	6116.34	543.273	4047.76	0.134216	0.037041	0.00217343	0.0161936	1.26715	3.76345	0.816245	1.27516	88.7768	3.97361	0.789175	3.76345	0.947111	4950.35	36.2762	3750.23	210.544	4566.51	76.8156
210-01_Region1_12		1016.81	17872.3	15098.2	38339	5552.72	12714.7	0.436716	0.233979	0.0222144	0.0508669	0.634425	2.8827	0.838553	0.621923	182.161	2.94902	1.57623	2.8827	0.97751	4988.67	17.6628	6100.42	223.477	5290.52	57.8794
210-01_Region1_13	outlier	bd	403	341.301	860.806	2495.27	10752.6	0.232061	0.00526664	0.00998264	0.0430173	24.3043	3.43252	0.873839	4.30357	4.95511	5.50481	0.0411449	3.43252	0.62355	5047.13	121.911	259.926	17.4654	1811.7	89.0007
210-01_Region1_14		bd	198.992	158.68	409.47	156.382	743.192	0.21042	0.00251713	0.000625628	0.00297324	3.5356	6.40462	0.894582	7.8942	34.8709	10.1655	0.282838	6.40462	0.630034	5080.33	223.308	1605.64	179.533	3635	183.129
210-01_Region1_15		bd	79.3625	58.1412	151.269	95.0629	487.864	0.194855	0.000947514	0.000380311	0.00195177	5.19654	8.94173	0.753663	9.82375	19.988	13.2839	0.192436	8.94173	0.673128	4836.59	280.919	1134.56	183.412	3090.77	229.025
210-01_Region1_18		bd	161.794	143.442	302.937	35.3085	182.474	0.193498	0.00199553	0.000141256	0.000730012	0.979277	6.47368	0.815474	8.63971	114.765	10.796	1.02116	6.47368	0.599638	4949.01	245.801	4536.16	408.471	4824.66	196.949
210-01_Region1_20		bd	2343.36	1922.17	5065.65	1509.03	2630.6	0.573645	0.0306173	0.00603708	0.0105241	1.02443	2.34562	0.824988	1.48052	110.987	2.77379	0.976157	2.34562	0.845639	4965.5	42.0902	4391	147.68	4790.97	54.3455
210-01_Region1_21		428.818	8275.73	7200.9	17912.7	3911.54	15075.6	0.259462	0.109556	0.0156486	0.0603119	1.62045	2.00332	0.854671	0.802058	72.6892	2.15791	0.617113	2.00332	0.92836	5015.69	22.7517	3098.42	97.8191	4366	42.3326
210-01_Region1_22		bd	4675.54	4025.87	10023.6	685.317	6283.09	0.109073	0.06144	0.0027417	0.0251363	1.2173	3.81898	0.847787	1.18426	95.9836	3.99839	0.821494	3.81898	0.955131	5004.22	33.6104	3865.64	218.322	4644.91	77.3391
210-01_Region1_23		bd	5109.9	4312.04	10775.6	726.149	3043.16	0.238616	0.0662716	0.00290505	0.0121746	0.521233	2.41978	0.844129	1.09826	223.194	2.65735	1.91853	2.41978	0.910599	4998.08	31.1779	6904.62	201.888	5495.77	52.3509
210-01_Region1_24		332.52	6374.47	5382.23	13700.9	852.296	2040.67	0.417655	0.0835308	0.00340972	0.00816395	0.274515	2.02201	0.849074	0.934294	426.271	2.22742	3.64279	2.02201	0.907778	5006.37	26.5136	9897.28	201.366	6150.6	44.1538
210-01_Region1_25		bd	292.722	231.047	546.73	45.1371	251.828	0.179238	0.0035125	0.000180577	0.00100747	0.7488	6.72917	0.805566	7.96047	148.266	10.4236	1.33547	6.72917	0.645572	4931.61	226.653	5467.93	477.937	5082.73	191.095
210-01_Region1_26		bd	266.347	219.746	589.458	79.6493	260.956	0.305221	0.00352907	0.000318647	0.00104399	0.861166	4.65274	0.834954	4.0903	133.623	6.19504	1.16122	4.65274	0.751042	4982.56	116.197	4968.07	314.51	4977.89	117.771
210-01_Region1_27		bd	203.052	154.957	357.154	92.4718	346.445	0.266916	0.00234658	0.000369946	0.001386	1.55839	7.39474	0.865083	11.9244	76.5047	14.0311	0.641688	7.39474	0.527023	5032.86	338.002	3195.65	362.28	4417.26	248.277
210-01_Region1_28		bd	293.014	224.882	587.639	196.416	680.844	0.288489	0.00362746	0.000785789	0.00272381	2.07878	4.655	0.757258	5.13606	50.2043	6.93168	0.481051	4.655	0.671555	4843.4	146.824	2531.84	192.046	3996.37	129.409
210-01_Region1_29		930.142	18614.9	15744.9	39880.8	17801.4	29643.5	0.600514	0.243597	0.0712167	0.118593	1.43828	2.319	0.835435	0.79988	80.0526	2.45307	0.695275	2.319	0.945345	4983.38	22.7221	3402.71	121.47	4462.71	48.0467
210-01_Region1_30		bd	652.105	521.861	1257.65	290.149	462.144	0.627832	0.00797857	0.00116078	0.00184887	0.729591	5.5789	0.808057	2.73777	152.64	6.21446	1.37063	5.5789	0.897729	4936	77.9354	5564.26	403.003	5112.06	118.222
210-01_Region1_31		bd	100.802	71.8942	180.217	86.8937	349.118	0.248895	0.00115797	0.00034763	0.00139669	3.59265	8.24433	0.873061	8.68111	33.4916	11.9721	0.278346	8.24433	0.68863	5045.86	245.931	1583.03	227.383	3595.18	212.26

## Sheet: G48019
Rochelle-Bates, N., et al., 2020, Geochronology of volcanically associated hydrocarbon charge in the pre-salt carbonates of the Namibe Basin, Angola: Geology, v. 49, https://doi.org/10.1130/G48019.1
